# Supplementary material for: Should we care: a qualitative exploration of the factors that influence the decision of early marriage among young men in urban slums of Bangladesh
Source: PubMed Central journal article supplement — BMJ Open. 2020 Oct 26;10(10):e039195. doi: 10.1136/bmjopen-2020-039195 (PMC7592268; doi:10.1136/bmjopen-2020-039195), 2020-10-26
Supplement: bmjopen-2020-039195.draft_revisions.pdf [file bmjopen-2020-039195.draft_revisions.pdf]

# BMJ Open

BMJ Open is committed to open peer review. As part of this commitment we make the peer review history of every article we publish publicly available.

When an article is published we post the peer reviewers' comments and the authors' responses online. We also post the versions of the paper that were used during peer review. These are the versions that the peer review comments apply to.

The versions of the paper that follow are the versions that were submitted during the peer review process. They are not the versions of record or the final published versions. They should not be cited or distributed as the published version of this manuscript.

BMJ Open is an open access journal and the full, final, typeset and author-corrected version of record of the manuscript is available on our site with no access controls, subscription charges or pay-per-view fees (<http://bmjopen.bmj.com>).

If you have any questions on BMJ Open's open peer review process please email [info.bmjopen@bmj.com](mailto:info.bmjopen@bmj.com)

# BMJ Open

**Should we care: A qualitative exploration of the factors influence the decision of early marriage among young males in urban slums of Bangladesh.**

|                               |                                                                                                                                                                                                                       |
|-------------------------------|-----------------------------------------------------------------------------------------------------------------------------------------------------------------------------------------------------------------------|
| Journal:                      | <i>BMJ Open</i>                                                                                                                                                                                                       |
| Manuscript ID                 | bmjopen-2020-039195                                                                                                                                                                                                   |
| Article Type:                 | Original research                                                                                                                                                                                                     |
| Date Submitted by the Author: | 09-Apr-2020                                                                                                                                                                                                           |
| Complete List of Authors:     | Biswas, Subas; BRAC University James P Grant School of Public Health Karim, Shuchi; BRAC University James P Grant School of Public Health, Rashid, Sabina Faiz; BRAC University James P Grant School of Public Health |
| Keywords:                     | Health policy < HEALTH SERVICES ADMINISTRATION & MANAGEMENT, QUALITATIVE RESEARCH, Risk management < HEALTH SERVICES ADMINISTRATION & MANAGEMENT, Change management < HEALTH SERVICES ADMINISTRATION & MANAGEMENT     |
|                               |                                                                                                                                                                                                                       |

SCHOLARONE™  
Manuscripts

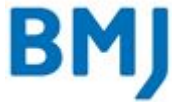

I, the Submitting Author has the right to grant and does grant on behalf of all authors of the Work (as defined in the below author licence), an exclusive licence and/or a non-exclusive licence for contributions from authors who are: i) UK Crown employees; ii) where BMJ has agreed a CC-BY licence shall apply, and/or iii) in accordance with the terms applicable for US Federal Government officers or employees acting as part of their official duties; on a worldwide, perpetual, irrevocable, royalty-free basis to BMJ Publishing Group Ltd ("BMJ") its licensees and where the relevant Journal is co-owned by BMJ to the co-owners of the Journal, to publish the Work in this journal and any other BMJ products and to exploit all rights, as set out in our [licence](#).

The Submitting Author accepts and understands that any supply made under these terms is made by BMJ to the Submitting Author unless you are acting as an employee on behalf of your employer or a postgraduate student of an affiliated institution which is paying any applicable article publishing charge ("APC") for Open Access articles. Where the Submitting Author wishes to make the Work available on an Open Access basis (and intends to pay the relevant APC), the terms of reuse of such Open Access shall be governed by a Creative Commons licence – details of these licences and which [Creative Commons](#) licence will apply to this Work are set out in our licence referred to above.

Other than as permitted in any relevant BMJ Author's Self Archiving Policies, I confirm this Work has not been accepted for publication elsewhere, is not being considered for publication elsewhere and does not duplicate material already published. I confirm all authors consent to publication of this Work and authorise the granting of this licence.

1  
2  
3  
4 **Should we care: A qualitative exploration of the factors influence the decision of early marriage**  
5 **among young males in urban slum of Bangladesh.**

6 Subas Biswas<sup>1</sup>, Shuchi Karim<sup>1,2</sup>, Sabina F Rashid<sup>1</sup>  
7  
8  
9

10  
11 **Abstract**  
12

13 **Objectives** To explore how adolescent and young males negotiate their complex realities to explain their  
14 pathways into and reasons for early marriage in urban slum of Bangladesh.  
15

16 **Design** Qualitative data were used from a three years study from where both quantitative and  
17 qualitative methods were used to collect data.  
18

19 **Setting** Interviews were conducted in two biggest slums in Dhaka and Chittagong city of Bangladesh  
20 from December 2015 to March 2018.  
21

22 **Participants** This paper uses qualitative data from 22 In-depth interviews (IDIs) and 3 focus group  
23 discussions (FGD) with married and unmarried adolescent and young males aged 15-24 years; 13 IDIs  
24 and 4 FGDs with parents and 11 key-informant interviews (KIIs) with community leaders. The  
25 purposively selected respondents were interviewed in their respective settings.  
26  
27

28 **Results** In the context of the urban slums, study revealed that the perceived phenomena of adulthood;  
29 drop out from education earlier due to poverty which influence early initiation to income; their  
30 aspiration, choice and practicing agency; and desire for family formation and sexuality influence the  
31 marriage decision making process especially early marriage among the young males in the context of  
32 urban slums of Bangladesh.  
33  
34

35 **Conclusions** Study findings shed light on the complex structural factors, social and gender norms, driving  
36 the phenomenon of early marriage for both adolescent boys and young males in Bangladesh's urban  
37 slums, where conservatism, poverty and urbanization intersect. It is critical that young males should be  
38 included in the national and global conversations around child marriage and in the design of research  
39 and interventions to prevent child marriage  
40  
41  
42

43  
44  
45  
46 Key words: Early marriage, Young males, Urbanslums, Bangladesh  
47  
48  
49

50  
51 **Strengths and limitations of this study**  
52

- 53 ➤ This is one of the pioneer studies which explored the complex realities, pathways into and  
54 reasons for early marriage of adolescent and young males in urban slums of Bangladesh.  
55  
56  
57

- The in-depth qualitative data were collected using follow-up interview sessions spending long days with respondents to capture and understand holistic scenario of the realities and practices of early marriage.
- Data were collected from two slums of two cities may not represent the whole adolescent and young males realities of other slums in Bangladesh.

Due to the issue sensitivity, our respondents might have some conservativeness to open up and alter the information.

## Introduction

Child marriage is a major concern and a public health problem particularly in developing countries. The agenda of 'child marriage' as it pertains to girls has been extensively researched, reviewed and advocated, in an effort to eradicate the practice of Early and Child Marriage (ECM) and comprehend how it impacts the social, cultural, health and economic identity of a girl(1-5).Most of the literature explores that the root causes of child marriage of girls are poverty, gender discrimination, discriminative social norms, patriarchal attitude, customs and many others(6, 7).However, there is a huge gap in the existing literature with regards to young males' child marriage and its impact on their life (8). Nevertheless, young males also suffer too as their marriage also brings early fatherhood, lowers education and job opportunities which limits their earning power and economic prospects, creates pressure to have income and to provide economic support and take care of families, affects life expectation, freedom, physical and psychological health and social life(9-13).

Although the prevalence of child marriage among boys and young males are lower than the girls, however, these are not uncommon. In a recent UNICEF analysis, it was shown that globally, 115 million boys were married before the age of 18. Among them, one in five was wed before his 15th birthday(14). An evaluation of 82 low and middle income countries data showed that about one in twenty-five boys marry before their age of 18. However, in South Asian context, this rate is about to be 5%(15, 16).

Despite this massive figure, there is a dearth of knowledge about these young males/adolescent grooms, which essentially means that millions of young males are almost non-existent and invisible from past and ongoing research, advocacy, policy and preventive programs surrounding early and child marriage. Recent few researches indicate that in urban slums in Bangladesh, there is an increasing trend for young males to marry before legal age of marriage(17). Keeping this rising but mostly unaddressed issue of ECM of young males in general, and in urban low income/slum context in Bangladesh. This paper aims at understanding the factors influencing and contributing to the causes of early marriage among young males, and what implications does this have on the discourse as well as interventions related to early marriage prevention strategy for all stakeholders. The paper also aims to engage with a deeper understanding of masculinity and sexuality – which hopefully will contribute in a more nuanced analysis of gender and marriage as a social construction in the hetero patriarchal society of Bangladesh.

1  
2  
3 The paper is divided into the following sections: 1) Contextual & conceptual framework or background,  
4 2) methodology, 3) Results, 4) Discussion and 5) Conclusion.  
5  
6  
7

## 8 **Section 1: Contextual Background**

9

### 10 ***Early marriage and Young males: Context of Slums in Bangladesh***

11

12 The Bangladesh demographic health survey stated that about four per cent of men aged 20-24 in  
13 Bangladesh get married by the age of 18 in 2011(18). However, a survey conducted in some selected  
14 slums in Dhaka, Bangladesh reported that approximately 80% of the females and 46% of the males in  
15 the slums are the victims of child marriage before they turn 18(17). So, it is observed that the child  
16 marriage among males in slums are relatively higher than the national prevalence. Early literature also  
17 explored poor socioeconomic condition, like the context of slum, adolescents are more vulnerable to be  
18 victimized and experience child marriage(19, 20). In urban slums context of Bangladesh, adolescents  
19 living in exacerbated socio-economic conditions, lack scopes for proper information and life  
20 opportunities. Poor people in urban slums pass their everyday live in scarcity and uncertainty, lack of  
21 scope of opportunities increases the risks of adolescent young males engaging in harmful practices (i.e.  
22 gang involvement, early marriage) intersecting with societal gendered expectations about male roles  
23 and responsibilities and rapidly evolving urbanization that harm their development and wellbeing(21).  
24 Therefore, these new phenomena of child marriage practice amongst young males in a low income, high  
25 population density urban slum context which are usually not discussed or focused on, but it is important  
26 to understand factors that are shaping early marriage among young males in these contexts. This has  
27 implications not only the young males' emotional well-being and health but also on their wives and  
28 extended families.  
29  
30  
31  
32

### 33 **Framing marriageable age**

34

35 Internationally 18 years is set for adulthood and marriage for males(22), however, Bangladesh has set  
36 legal age for marriage for males at 21 years. Though there is a provision that marriage can be arranged  
37 before this age in any special circumstances with consent of legal guardians to get a court order(23).  
38

39 Moreover, marriage in Bangladesh is largely regulated by personal laws which allow marriage before  
40 18(24)(25). Thus, legal loopholes and personal laws, many other religious and customary provisions  
41 create challenge to stop child marriage in the patriarchal society of Bangladesh{Ferdous, 2019 #1982}.  
42  
43

44 These perceptions of marriageable age for girls and boys come from the basic social construction of  
45 marriage where the male is ideally responsible for financial care of household, to be the provider and  
46 protector of the woman/wife. On the other hand woman/wife is expected to be responsible for  
47 household and reproduction(26). This binary of roles of provider and dependent creates a gender power  
48 relation, tilted favorably towards the man in terms of decision making. In other words, a man's eligibility  
49 centers around financial capacity and virility, while a woman's eligibility is centered around her sexual  
50 and reproductive ability. However, the issues of boy's marriageable age remains unaddressed and  
51 unchallenged.  
52  
53  
54  
55  
56  
57

## Boys and young males in the SRHR and Child marriage framework

The SDGs have prioritized on 'leaving no one behind' regarding health and wellbeing, education and gender equality and also specified targets in goals 3, 4 and 5 to increase access to sexual and reproductive health (SRHR) for all. Furthermore, Bangladesh government also sets a target to end child marriage by 2041. Therefore, this paper is particularly positioned in the SRHR and child marriage framework. There is a lack of sense of urgency of addressing the issue of boys and young men within the child marriage space, and this particular paper is a part of a broader research which would like to understand normative perceptions and gender dynamics in the poor urban setting in Bangladesh, focusing on the child marriage phenomena.

### Section 2: Methods

This paper is based on a broader research project conducted to investigate the underlying issues that lead to early, child and forced marriages in the contexts of urban slums and specific realities of life in urban slums that lead families to choose child marriage for their children or adolescents to choose child marriage for themselves.

#### Study settings, respondents and data collection methodology

The broader study was conducted in two purposively selected slums: Bhashantek slum and Shantinagar slum located within Dhaka (capital city) and Chittagong (industrial city) city corporations respectively; two of the oldest and largest urban slums in Bangladesh.

Broader research project collected both quantitative and qualitative data using questionnaire survey with 2136 adolescent girls and young women aged 13-24 years and 96 In-depth interview (IDI), and 12 focus group discussion (FGD) were conducted with married and unmarried adolescents and young girls and boys aged 15-24 years, their parents and 33 key-informant interviews (KII) with community leaders, teachers, marriage registrars and program people.

To understand the reasons and pathways into child marriage among young males, this paper uses qualitative data from 22 In-depth interviews (IDIs) and 3 focus group discussions (FGD) with married and unmarried adolescent and young males aged 15-24 years; 13 IDIs and 4 FGDs with parents and 11 key-informant interviews (KIIs) with community leaders. Among 22 IDIs with adolescent and young males, 12 were early married and 10 were unmarried.

Adolescent and young male participants were selected as interviewee covering diverse groups, married and unmarried, working and not working, in education and not in education. The question guide aimed to extract information regarding the perception, attitude and practice towards marriage, early marriage and their expectations from marriage and in married life. The guideline also included questions to understand the context that influences to young males to get married early and what are the roles they play in these circumstances leading to their marriage, in the decision-making process. After collecting data, verbatim transcript and translation were done of interview recordings, data were coded using Atlasti, followed by thematic analysis.

1  
2  
3 Data were collected using pretested guidelines phase by phase in two study sites from December 2015  
4 to March 2018 by trained interviewers. All the interviews took place at the participant's own settings.  
5 Written informed consent was obtained from all the interview participants. The ethical approval of the  
6 study was obtained from the ethical review committee of the BRAC James P. Grant School of Public  
7 Health (JPGSPH), BRAC University, Dhaka, Bangladesh.  
8  
9

### 10 **Patient and public involvement**

11 Neither patients nor community people of the study sites were involved during the design and  
12 development of the study. However, the study team sought expert consultation meetings with the key  
13 persons from the academia, researchers as well as practitioners and policy makers. The study results  
14 are also shared with national and international communities for advocacy.  
15  
16  
17  
18  
19

### 20 **Section 4: Results : Reasons of early marriage among young males in urban slums**(Pseudonyms are 21 used to maintain confidentiality)

22 Findings revealed that there are many underlying factors that influence a boy's decision to get married  
23 early within the context of the urban slum. Theme 1 describes the perception of adulthood among the  
24 respondents and how this influence marriage decision making. Theme 2 states the practices and  
25 pathways to making of child marriage decision. Under this theme 2, several sub-themes are identified:  
26 capacity to earn a living and play role of a breadwinner, to ensure a fruitful endings of romantic  
27 relationship, to fulfill sexual desire, aspiration to form a family and expand social support network  
28 through kinship, and finally parental perception of 'protecting' family 'honor' as well the need to  
29 'stabilize' a boy's future. However, decisions pertaining to child marriages of young males are not made  
30 in isolation or made specific to one of these factors.  
31  
32  
33  
34

### 35 **Theme 1: Perceptions of adulthood, being a 'real man' and readiness for marriage**

36 Regarding perception of adulthood, data from IDI and FGD with male respondents and their parents, it  
37 was revealed that there were two stages *na-balok*(*balok*, is a noun, male child around 15/16 years of  
38 age, inexperienced and lacks understanding, *na-Balok* is an adjective, not-adult, underage, someone  
39 who is not yet old enough to get citizenship rights) and *sa-balok*(adjective, adult or coming of age),  
40 which conceptually and colloquially mean childhood and adulthood respectively, and the application of  
41 the concepts is for male youth usually aged 13-24. From parent's point of views, *na-balok* is not an age,  
42 but rather a life stage when young males are under parent's care, who are not capable of understanding  
43 and differentiating between what is good or bad for them. It also implies lack of financial capacity as  
44 they are not able to generate steady income or take responsibilities for themselves or their families. One  
45 the other hand, when a boy can earn, he is understood to be capable differentiating between good or  
46 bad things and take responsibilities – therefore, irrespective of the age, this capacity of earning and  
47 awareness of the world grants him adulthood, and he transitions from being a '*na-balok*' to a '*sa-balok*'.  
48  
49  
50  
51

52 *"A boy is considered as a man (barohoyese-become grown up or adult) when he can work and*  
53 *earn enough to feed his parents and family members. He can understand good or bad things for*  
54 *his life and capable of taking his own decisions - the right decisions. He can take responsibilities*  
55  
56  
57



1  
2  
3 *of his own and also a wife . . . then he can marry as he has capacity to feed his wife including his*  
4 *parents.” (Mother of adolescents, 55yrin FGD, Bhashantek slum)*  
5

6 It is significant to notice that adulthood for a boy includes capacity to take responsibilities of his  
7 immediate family along with the potential of taking a wife, thus starting his own family in time.  
8 Therefore, adulthood for male gender is also about having the capacity of becoming a breadwinner and  
9 society given gendered responsibility of financially carry an extended version of a family – not a nuclear  
10 unit of his own. Here, age is just a number, and adulthood relates to social and gendered concepts of  
11 roles and norms. And when a boy earns these characteristics of adulthood, he is also granted the right of  
12 marriage and considered as a ‘real man’.  
13  
14

15  
16 But we also see change in this social concept and practice of adulthood for young males, as increasing  
17 exposure to education and social advocacy awareness programs convince young men to marry at a later  
18 age:  
19

20 *“For adult, 18 is not enough, you need more 6-7 years You need job and income, enough income.*  
21 *. . . Before 27-28-30 (years of age), you will not be able to establish financially. Only age,*  
22 *physical growth is not enough (to be an adult)”. (Unmarried boy, age 21, in FGD, Shantinagar*  
23 *slum)*  
24  
25

26 There is also an awareness that income only cannot make a young male ready for big responsibilities of  
27 life, like marriage. In the context of Bangladesh, and increasing financial hardship, some felt that it is  
28 okay for a male to delay his marriage as long as needed. Higher the educational aspiration and  
29 qualification the later he is able to financially become independent and hence delay the marriage. But  
30 the bottom line of either side of the argument is that age of marriage for a young male is dependent on  
31 being perceived as a financially capable man, who is ready to take on family responsibilities – depending  
32 on whatever socio-economic-educational background one belongs to – but never depending on what  
33 the legal framework might dictate.  
34  
35

36 It is important to briefly compare perceptions of boy’s age of marriage with that of girls by the same  
37 respondents as it clearly indicates differences in norms and practices based on genders. A girl’s  
38 readiness for marriage is viewed as being sometime dependent on her biology, at the wake of puberty.  
39 When a girl reaches puberty, her body shows physical forms of womanhood and reaches menarche –  
40 she is believed to be ready for marriage. The social understanding of girl’s purpose and readiness of  
41 marriage is her capacity of reproduction, to be able to take care of household responsibilities and be in  
42 service of her husband and in laws. Financial dependence, not independence is a primary concern for  
43 girl’s marriage as female gender is considered as responsibility (and burden) for her male custodians  
44 (Father, brother and/or husband). Therefore, reasons influencing the age and readiness of marriage for  
45 male and female have almost polar opposite positioning of age, income and responsibilities. In the poor  
46 socio-economic contexts of slums in Bangladesh, adolescents have to play adult’ roles for which they are  
47 not ready for- be it marriage or income generating activities. For the greater benefits of their families  
48 they have to engage in income generating activities earlier to extend financial help to their family (in  
49 case of young males), or marry into another family (in case of girls) – as a strategy for their respective  
50 survival. Thus, community people, parents, even young males in both slums considered income of a boy  
51 as the primary attribute to be able to get married.  
52  
53  
54  
55  
56  
57

## Theme 2: Decision and pathway into early child marriage of young males

The data revealed that a very common pathway of young males' lives in urban slums is poverty that results in discontinuation of education. Even though young males, because of their social privileges of gender get priorities in families to continue education, usually – poverty is nevertheless a reason for them to drop out from school due to lack of financial resources. There is also an additional reason of peer pressure as young males from similar age group and backgrounds tend to drop out of schools for various reasons and manage to secure some kinds of job or the other in the informal sector as they are expected to support the family. Seeing peers earning money and gaining independence and markers of adulthood – encouraged many to leave school and aspire to earn, take control of life decisions and feel that they are adults. Besides these, many of the young males get married early to bring fruition to their romantic relationships, to fulfill their desires to form a family and expand social support network through kinship, and finally to fulfill newly found sexual desire, which can continue under the umbrella of marriage. Many times parents and families also encourage and support young males at a young age to fulfill these desires and aspirations to start their adult lives as it is considered to socially more acceptable and respectable to organize marriage by families than allowing children to elope or take independent decisions.

### 2.1 Out of school, into adulthood: Incomplete education, lack of social capital

As presented in previous section that adulthood and age of marriage for young males in urban slums are primarily gained through work and economic capacity before reaching legal age of adulthood. Slum populations are consisted of internally migrated people/families from rural areas often caused by poverty, displacement and economic aspirations for better future in the cities. Slum dwelling is also a socio-economically instable reality for its dwellers live a marginalized existence with a constant threat of evictions and lack of basic amenities. The pressure to earn a living to keep households running is on almost every member of slum households, especially on young males because of their gender. This happens in households where the father is not working, has died, is very sick or has left the household or there is a stepparent who is unwilling to support the rest of the household. These social and economic instabilities in slum communities lead a majority of adolescent boys to drop out of school if they were studying and become early seekers of employment. IDI and FGD with young males and parents found that school dropout is very common in urban slums and the most cited reason is lack of financial support. Parents prefer to send their young sons to work so as to provide the family with additional income and ease the burden of ever increasing expenditures of urban living, with cash required to pay for rent, use of water and other services, food costs, etc. Sometimes, because of the pressure of economic uncertainties, adolescent young males themselves often decide to drop out of school and engage in income-generating activities.

Generating income for a household also translates into a sense of agency or freedom for young males. Monetary freedom can grant them a degree of control over family decisions, including ones regarding his personal life. Saiful, a 23 year old young man in Bhashantek slum, got married at 20, explained the context of economic freedom, agency and decision making process:

1  
2  
3 *'I had an income. . . I could feed a family. I don't know whether I was at the marriageable age or*  
4 *not but personally I think, I was ready to get married. So, I did (got married).. . I think, age was*  
5 *never a problem.'*  
6

7 During a KII, a male community leader (55 years old) in Bhashantekslum explained it further:  
8

9 *"As he (a boy) earns and feeds his family members, parent also have some kinds of economical*  
10 *dependency. If he (the boy) wants to marry, parent may try to prohibit or may not readily agree*  
11 *to his proposal but they cannot create pressure. If they do so, the boy may be get married by*  
12 *himself without the consent of his parents. It is disgraceful (for parents). So, parents agree with*  
13 *such marriage."*  
14  
15

16 However, Asad who worked as a carpenter for last four years, did not want to get married at that  
17 moment as he felt that he had many responsibilities to his family and parents. Even though he is now  
18 economically capable of making his own decisions, he prefers to leave marriage decision on his parents:  
19

20 *It will be in future. I can't tell about this. However, all the parents want what will be good for*  
21 *their children. If they decide anything about my marriage, they want to marry me off and even if*  
22 *they do not ask for my opinion, I will have no say and will not refuse their decision. (Asad,*  
23 *unmarried boy, age 17, education-5, Bhashantek slum).*  
24  
25

26 Thus, the idea of having income and potential responsibilities and capacities to take care of a wife define  
27 the age of marriageable stage and lead young males to the decision of marriage. However, the lack of  
28 options for many of these young couples in the slums, this is seen as pragmatic behavior although there  
29 are consequences as many are too young to handle the responsibilities of marriage and children.  
30  
31

## 32 **2.2 Desire for family formation, building kinship and expansion of social networks: Marriage as a** 33 **medium of social and economic stability:** 34

35 Saiful, a 23 years old young male, got married at 20 talks about role of marriage as a pathway or means  
36 to bringing regularity and stability in one's life. His father remarried after his mother's death and lived in  
37 a separate household in the same slum as Saiful and his brother. He feels that marriage brought back  
38 stability, motivation and discipline in his life, which was very much lacking when he lived without a  
39 guardian or loved one:  
40

41 *"Before my marriage, I had enough earnings and could feed my family members. But I would*  
42 *spend all my money to buy cloths, hang out with friends and at the end of the month, I was*  
43 *empty handed. Then I thought, if I get married, I would have to push myself to work hard and*  
44 *earn more. I thought, I need a family life otherwise I wouldn't be going forward with my life."*  
45  
46 (Saiful, age 23, married at 20, Bhashantek slum)  
47  
48

49 All adolescent boy respondents mentioned that marriage is a mandatory and obligatory social norm  
50 which is unavoidable and non-negotiable. As boys they are expected to get married at some stage of  
51 their lives and head the family household. There is a common perception that everybody must form a  
52 family and everyone should get married at some stage of their lives. This role of a husband, a father and  
53 potential head of family – is a role that one must fulfill as part of his duty in life. Because boys in urban  
54  
55  
56  
57

1  
2  
3 slums are either forced by circumstances to earn a living and be economically independent earlier in life  
4 – most did not see any good reason to delay marriage.  
5

6 *“As I am a boy, one day I have to be married. I will have to form a family, I will have one or two*  
7 *kids. As I loved this girl, I didn’t want to lose her, so we got married...”*(an early married boy, age  
8 18, married at 17, worked in a garment factory, Shantinagar slum, he has a romantic relationship  
9 with his colleague in same garment factory and got married by eloping).  
10  
11

12 Marriage, in a traditional South Asian/ Bangladeshi cultural context is not only a norm but it is a social  
13 institution that is used as the basis of expanding kinship, social network and resources. Kinship and  
14 families work as social safety networks, especially for low income urban poor slum dwellers that depend  
15 heavily on kinship and such networks for survival in cities. For many young people, life in slums is devoid  
16 of experiences of extended family, support and nurturing – and marriage is seen as a way to acquire  
17 these experiences along with gaining valuable social capitals. Desiring kinship and extension of social  
18 network, is cited by Mojnu (24) an orphan boy. Monjulived with his distant maternal uncles before his  
19 marriage (at the age of 16). He stated that his uncles also influenced his decision of getting married at a  
20 young age:  
21  
22

23  
24 *“They (uncles) told if I got married, I would have a family, I would have in-laws and a guardian*  
25 *through them. As I had no one, I thought my wife and her family would give me the support I*  
26 *needed. . . At that time, I also thought, it would be better if I got married since my wife would be*  
27 *able to take care of my family, my food, washing my cloths.’* (An early married male, age 24,  
28 married at 16, Bhashantek slum)  
29  
30

31 In hetero-patriarchal social arrangement of marriage, if the boy is expected to bring financial support,  
32 the girl (wife) is expected to bring free labor to support and care for her husband and his household.  
33 Marriage is not only about love or sexual desires being fulfilled, but the economic aspect of providing in  
34 exchange of free labor at household level in terms of care services – is a transactional reality.  
35  
36

37 Fahim, an early married adolescent supported this aspect and utility of early marriage:

38 *I decided to get married as we needed a support for household work. My mother cannot do any*  
39 *work, she is a diabetic patient. My sister goes to work in a garment factory. It is not possible for*  
40 *her to do all the household chores. I felt that I needed to bring in a support. As she (wife) was*  
41 *able to do household works and she could also earn. I though, it would be better to run our*  
42 *family with her income and my income. .”*(An early married boy, age 18, married at 17, worked  
43 in a garment factory, Shantinagar slum, he has a romantic relationship with his colleague in  
44 same garment factory and got married).  
45  
46  
47

48 Unfortunately, a few months after their marriage, Fahim lost his job and at the time of interview, he was  
49 very much worried regarding inability to maintain household financial responsibilities. All of the early  
50 married males expressed that marriage brought many and overburdened responsibilities into their  
51 young males’ life, which they were not prepared for. The pressure to earn and be responsible for a  
52 family or household, gave rise to psychological stress to them. An early married boy expressed his  
53 feelings-  
54  
55  
56  
57

1  
2  
3 *'At times I do not feel good since I am unable to give anything to my wife. I have no income and I*  
4 *have to depend on my father. But I am married, and when my wife asks for something, I cannot*  
5 *provide it to her. It is not always possible to ask money (from my father) for me and my wife.'*  
6 (Maruf, 21, married at 20, Bhashantek slum)  
7

8 Moreover, it was common for young males to stop their education mid-way or opt for low income  
9 employment opportunities as they had no previous experience, skill in job which limited their scope to  
10 earn more, forcing them to opt for low income, unskilled and physically hardworking jobs. Furthermore,  
11 lack of awareness and poor participation in sexual and reproductive health services, early fatherhood  
12 was a common phenomenon to the early married young males in urban slums. It created an extra  
13 psychological stress as they were not able to meet the demands and proper care of children.  
14

15  
16 As our respondents stated that adjusting to new adult responsibilities like adulthood and parenthood,  
17 financial responsibilities of running a household and balancing new relationship dynamics in the family  
18 and society, settling down to a routine of domestic situation yet remaining entitled to young masculinity  
19 challenges their gender and sex role performance, create a stressful situation in their lives. Though  
20 culturally most of these new life situations are often fallen on the bride/young girls' shoulders as she is  
21 expected to become an adult all on a sudden – it is not that different or easy for the young men.  
22

### 23 **2.3 Fulfillment of sexual desire**

24  
25 Sex is a taboo topic in Bangladeshi society, even though fulfillment of sexual desire is considered as the  
26 primary basis of all marriages. In the discussion of marriage, issues of sexual and reproductive health  
27 and rights are still difficult to bring into discussions, especially with young people. Fulfillment of sexual  
28 desire is nevertheless cited as one of the reasons to influence young males' decision to get married  
29 early. During one to one interviews and some informal discussions, some respondents did admit that sex  
30 was one of the driving forces to get married so early. Sex outside marriage and before marriage is  
31 considered sinful, is socially condemned and is matter of public shaming (when revealed) – marriage  
32 remains the only legal and socially acceptable way of fulfilling sexual desires, which is natural for  
33 everyone. To pursue a regular sexual relationship without negative consequences, marriage is  
34 considered as a valid pathway for young men.  
35

36  
37  
38  
39  
40 *"Outside of marriage, I will not always get to fulfill my sexual desires. Even if I want to have sex*  
41 *with a prostitute, I need money! But then she (partner outside marriage) may complain about*  
42 *me or file a case against me! So many people think it is better off to marry a girl instead. Then I*  
43 *can have with her anytime and no one will say anything."* (age 24, married at 16, in IDI,  
44 Bhashantek slum)  
45

46  
47 Sexual satisfaction, or at least fulfilling sexual urges/desires is considered to be a male entitlement.  
48 Through marriage, a young male desires to have easy access to sex with his wife without having to  
49 spend money. Regarding this issue young male's sexuality, sexual awareness and desires, a local school  
50 teacher tried to explain social reasons:  
51

52 *"Most of the adolescent now a days, have access to the internet. Those who do not have their*  
53 *own mobile phones, their friends have it and they share phones for watching pornography. It*  
54 *may also influence sexual desire. Adolescents get involved in sexual relation out of marriage to*  
55  
56  
57

1  
2  
3 *meet up this desire, which is not socially accepted. Also partners are not always available (to*  
4 *monitor). They are also involved in some risks as society does not approve of sex out of marriage.*  
5 *It may be another cause of getting married earlier for the adolescents.” (Teacher, age 39, in*  
6 *teaching profession-17 years, Shantinagar slum)*  
7  
8

9 Pre-marital relationships are not socially or morally accepted in the social fabric of Bangladesh, such  
10 relationships attract varying degrees of punishments from communities, families and other social/legal  
11 structures. Study findings suggested that the desire for sexual fulfillment among adolescent boys plays a  
12 vital role as a cultural factor influencing decisions pertaining to child marriage. However, many of young  
13 male respondents reported that husbands lost attraction to wife day by day and they involved in  
14 extramarital relationships.  
15  
16

#### 17 18 19 **2.4 To ensure fruitful endings to romantic relationships**

20 There was a common perception across all of our respondents that the prevalence of romantic  
21 relationships between adolescent boys and girls in the slums was increasing compared to before, or  
22 at least young people were more open about being involved in relationships. They mentioned that  
23 mobile phone affordability and accessibility had made it easier for adolescents to communicate with  
24 each other, engage in romantic relationships and bypass guardian’s surveillance. Moreover, due to the  
25 very congested nature of slums, young males and girls could easily interact with one another and  
26 neighborhood surveillance of adolescents is far lower than it is in rural areas.  
27  
28

29 Findings showed that once adolescents engaged in a teen romance, there is a fear of losing ‘love’, which  
30 results in decisions about getting marry as early as possible. A few respondents decided to marry  
31 “simply out of love” and due to a fear of losing their girlfriend to someone else if they were late by  
32 waiting for adulthood. Young males often become emotionally insecure and frustrated in romantic  
33 relationships at this age. Under emotional pressure they assume that only marriage can provide social  
34 acceptance to an otherwise frowned-upon romantic relationship. Among four cases of elopement, all  
35 respondents made the decision of elopement as they feared succumbing to family pressure to end  
36 relationships otherwise.  
37  
38

39  
40  
41 *“In our area, most of the early marriage occurred here due to love relation. Parents allow early*  
42 *marriage in a crucial situation. . . . In our area, most of the marriage occurred due to the*  
43 *relation. When the boy & girl left home and elope together for love affection and come back in*  
44 *the slum after some days, that time parents arranged for their marriage. . . . Out of 100, 80*  
45 *early marriages occurred here for love affair and most of the formal marriages were performed*  
46 *for leaving home with the partner.” (Participants of FGD with young males, Bhashantek slum)*  
47  
48

49 Unlike other cases, where young males made independent decisions (in agreement with parents) to  
50 marry early because they had financial agency and independence, in most cases of elopement, young  
51 males did not have any earning and were dependent on their parents. The rushed decision of getting  
52 married before reaching ‘adulthood’ was based on fear of losing the loved one. Rejection of romantic  
53 relations by parental families can put tremendous pressure on young couples. For example, Rusel (19,  
54 married at 17) and Tinni (19, married at 17) who were college students, had two years of relationship  
55  
56  
57

1  
2  
3 but the girl's family did not accept the relationship, so they decided to elope and get married. After  
4 getting married in the Kazi (marriage registrar) office, they stayed outside the slum for six months and  
5 afterwards both families accepted their marriage. Respondents mentioned that publicly declaring one's  
6 romance and being seen to be in a relationship are considered to be tabooed, and as a marker of  
7 dishonor to the family. There is always a fear of a girl being led to romantic relation with a promise of  
8 marriage and that promise being unfulfilled – that fear of disgrace is real and parents keep vigilance over  
9 young people all the time. On the other hand, it is also disgraceful for a boy if he fails to marry his  
10 girlfriend. When family member and guardian do not accept this relationship, or boys and girls fall into  
11 an uncertain situation about their future around this relationship, from the fear of losing this  
12 relationship, they decide to get married.  
13  
14  
15

16 Peer influences play a role when young males get into romantic relations. Some young males shared  
17 that they were influenced to engage in romantic relationship by listening and observing their other  
18 friends/co-workers who may be older or in a similar age group who are engaging in such relationships.  
19 In an FGD, respondents also mentioned that married adolescents could influence their unmarried  
20 adolescent peers through sharing stories of their sexual encounters, which instigates the desires and  
21 curiosity of young minds. Friends can influence young lovers to marry immediately as they offer social  
22 and moral support to the couples, even assisting them with their elopement plans.  
23  
24  
25

### 26 **Theme 3: Parental interference and influence: marriage as a disciplinary act**

27  
28 According to respondents, especially parents and young males who are dropped out of education and  
29 searched for any employment opportunities or were unemployed, remained at risk of engaging in risky  
30 practices such as drug addiction, gang involvement and violence which were prevalent in slum  
31 communities. As a result, most families lived with a constant fear that adolescent boys might easily  
32 become involved in these risky practices. To reduce the chance of their young sons engaging in risky  
33 behaviors, some parents resorted to their son's marriage as an effective means of ensuring young males  
34 would be kept away from gangs and other addictive and risky behaviors (i.e. drug and alcohol abuse,  
35 gambling, violence).  
36  
37

38 During an interview, Josna (age 45), mother of an early married adolescent boy in Shantinagar,  
39 mentioned that her son was eager to get married at the age of 16, at the onset of his puberty. He was  
40 already working as a daily labor at that time and therefore had an earning. Josna and her husband did  
41 not agree with their son's wish to be married so early in life. In response the young male stopped  
42 working regularly, started hanging out with friends, stayed away from home and started using drugs.  
43 After some time, Josna and her husband gave into their son's wish and arranged for his marriage  
44 because they feared their son was going astray and would be derailed in life. Marriage was, therefore,  
45 not only a fulfillment of their young son's desire, but also a socially acceptable method of controlling an  
46 unruly young male in a difficult environment where rule of law was absent.  
47  
48  
49

50 Parents culturally have control and ownership over children's lives. Important life decisions are made by  
51 parents, or at least in agreement and consent with them.  
52  
53

54 *'... if our parents want, then we have to marry. We cannot do anything else at that time. But we*  
55 *are not some guys who want to marry without doing anything. We have to wait for our family*  
56  
57

1  
2  
3 *order, we cannot break the order'* (FGD interview with adolescent boys and young males,  
4 Bhashantek slum).  
5

6 Marriage often is used as a disciplinary act to reign in an otherwise unruly son and help his guide back to  
7 a disciplined homely life:  
8

9 *'Suppose someone at 15 earns a lot, like 1000 BDT a day by driving. Now his parents can marry*  
10 *him off. Parents think that the boy has his own income and he may involve in bad practice such*  
11 *as drug use, buy sex . . .they think of getting him married...it will pull him to his wife and not*  
12 *towards bad things. And if there is a child – he will not go towards drugs and alcohol, because*  
13 *when he sees his child's potential future, he is discouraged'* (an unmarried young male in FGD,  
14 age 22, Shantinagar slum).  
15  
16

17 On the flip side of the previous section, i.e. early marriage as an outcome of young love – it is also true  
18 that early marriages are sometimes organized by parents who want to save family honor from being  
19 tarnished by their adolescent children's love/romantic relationships. Young respondents expressed that  
20 no matter what might be the nature of a romantic relation between a young boy and a girl – in slum  
21 societies, it is always seen with suspicion of immorality and of sexual nature. The collective suspicion  
22 and condemnation of any kind of relation between a young boy and girl can put a seal of disapproval  
23 and shame on family's name. Parents not only fear children engaging in premarital sexual relations, but  
24 also untimely elopement of young lovers – both of which are matter of disgrace.  
25  
26  
27

28 Sometimes social scrutiny and pressure can cause parents to arrange for their children's untimely and  
29 early marriages, for example, Masud (age 21, married at 20) had friendship with a girl, now his  
30 wife(age17, married at 16) near to their house. Both of them were in class nine and their relation at that  
31 point was nothing more than a likeable friendship. They exchanged notes and met for friendly chitchats  
32 in school. But their neighbors accused them of having premarital sex and complained to his parents  
33 about his conduct based on their suspicion. This brought tremendous pressure on the families, and on  
34 the adolescents. To save families and the young people from social shame and condemnation, his family  
35 arranged his marriage with her even though they both were below their legal age of marriage.  
36  
37  
38

39 Thus, the community plays an important role in early marriage, in both rural as well as urban slum  
40 locations. In the tightly spaced and squeezed living arrangements of slums, it is impossible to ignore or  
41 avoid neighbors, their opinions and influences, particularly in those sections that are tightly bounded.  
42 Slums are also socially organized through common norms, influences of religious bodies and social  
43 leaders. Sometimes, local leaders and society can interfere, support and even organize early marriages if  
44 they deem a situation to be crucial to uphold social morality. Local leaders and heads accept early  
45 marriage to 'save family honor' in cases where adolescents engage in romantic relationships with each  
46 other.  
47  
48  
49

#### 50 **Section 4: Discussion**

51  
52 Our study findings show that gendered social norms and masculine construction shape the decision and  
53 pathway into marriage of males. Our findings shows that the decision of marriage for young males is not  
54 based on their age rather their economic capacity to earn, capacity to provide financial responsibilities  
55 to family, willingness to form a family and expand social network, enjoy sexual life, to bring a girl to  
56  
57



1  
2  
3 support household work. It is also perceived that marriage is a medium to control sexuality, body and  
4 mind including bad habits like addiction, extramarital sexual relation. Our study results also support  
5 other research findings regarding the key drivers of child marriage practice among young males and  
6 young males conducted in the low and middle income countries in South Asia and Africa (27). However,  
7 our study findings and analysis focuses on particularly poor urban context in Bangladesh to understand  
8 deeply the determinants and pathways into the child marriage among young males. What we see in this  
9 research discussion is how gender, adulthood and marriage is lived through the social constructions of  
10 masculinity, gender stereotype roles and patriarchal ideology. Each of these shapes the attitude towards  
11 marriage and decision of child marriage among young males in these particular settings. Early marriage  
12 here is understood under the broader framework of adolescent sexual and reproductive health and  
13 rights (ASRHR). Hopefully findings from this research will help us to incorporate issues of gender and  
14 adulthood along with masculinity in ASRHR and child marriage prevention framework to address the  
15 problems for a sustainable solution.

16  
17  
18  
19  
20 The findings show that the decision towards child marriage among young males and young males in  
21 urban slum does not follow a linear pathway, rather it is multidimensional and context specific. Our  
22 findings showed that the decision of marriage among the married respondents was influenced by  
23 dominant masculine and gender role ideologies. In patriarchal domain, males are the main breadwinner  
24 for family and they mainly take the financial responsibilities of family. In the context of the patriarchal  
25 society of Bangladesh, males and husbands are considered as the breadwinner for family and it is  
26 essential to establish dominance in his family and society (28). Perceptions of masculinity in Bangladesh  
27 are dominated by concepts of strength, fear, honor, power, sexuality – and marriage plays a central role  
28 in fulfilling all these roles for men as it indicates health, power and financial capacity(17). Thus, it is seen  
29 in this research that when a young male has income, it automatically elevates him to the stage of  
30 adulthood. This strong sense of an emerging adult identity pushes young males to think that they are  
31 now capable of getting married as they are assuming the role of a breadwinner.

32  
33  
34  
35  
36 Respondents in the study showed a clear trend of thinking of peer support as a strong backup system in  
37 decisions of child or early marriages. Other studies showed that peers are the one of the most  
38 influencing group for adolescents in working place, schools or neighborhood (29, 30). Evidence in  
39 Bangladesh in urban slum showed that peer influences, parental will and care, social environment and  
40 adolescent's personal choice also play role in how adolescents will continue their lives in slum  
41 environment (31). Our study showed that peers had a significant influence to think about marriage as  
42 marriage gives them an adult identity which gradually places them as a significant and powerful male  
43 member of the family. Young males also get influenced by observing other married young males of  
44 similar age and contextual background. In the workplace, there are examples of many other peers who  
45 already are married at a relatively early age. Interaction with them, discussion about their married life  
46 also may have influence on adolescent young males into desire to get married.

47  
48  
49  
50  
51 Construction of gender roles in married life has also influence to think to get marriage. Our findings  
52 show that bringing a girl as wife in family would help to do household affairs. Therefore to get a free  
53 labor for household activities they wanted to get married. Marriage, through which a young male can  
54  
55  
56  
57

1  
2  
3 add support to household work, a care taker of his parents and family – is understood as a compliance  
4 to his role as a son.  
5

6 According to study respondent, there is an increasing trend of love relationship among adolescent and  
7 young generation is prominent than before. Young males who are in romantic relation, expressed that  
8 losing their girlfriend as wife is disgraceful for them, counted it as a defeat of being as a man. So, they  
9 marry by eloping and out of guardians consent as they want to prove their power as a man. This  
10 masculine attitude also accelerate child marriage among young males in the study context like urban  
11 slum.  
12  
13

14 Our findings revealed that access to movies, pornography influence and shape the need to be sexually  
15 active and in a relationship. Other studies also support this findings that watching pornography/adult  
16 sexual content can negatively influence young males, which motivates them to get involved in  
17 premarital sexual relationships and shapes their ideas of sex, sexuality and relationships (32, 33).  
18 Respondents agreed that marriage guarantees regular sex and a sexual partner. With marriage, sexual  
19 desire can be fulfilled without any additional costs or hassles.  
20  
21

22 Findings revealed that, parents are always in fear of their adolescent and young male child as children  
23 may get involved in gang violence, drug addiction or other anti-social activities. There are also evidence  
24 that norms, attitude and perceptions about heterogeneous masculinity often instigates adolescent  
25 young males to engage in unsafe harmful practices such as practicing violence against others, risky  
26 sexual practice, involvement in gangs, and substance abuse (34). In the economically, socially and  
27 politically marginalized slum setting, where adolescents lack parental guidance and are surrounded by  
28 violence, exploitation and abuse, these vulnerabilities of adolescence can be far greater and more  
29 damaging (35). Respondents informed that crimes, sexual and physical violence, drug addiction in urban  
30 slum area are very common. Earning capacity at a relatively early age in life not only grants some  
31 privileges of adulthood in terms of autonomy in spending money, but it also gives resistance to  
32 otherwise omnipresent parental surveillance. This capacity to earn and spend money can easily draw  
33 young males to 'bad habits and influences'. Other studies (36)also showed that same evidences. So,  
34 parents feel insecure about their sons' lifestyle, and their lack of control. Therefore, they try to engage  
35 their sons into work and often in marriages. It also helps parents to secure their financial needs for  
36 family. Parents along with (and often under pressure from) other people in society perceive 'marriage'  
37 of a young male may be a strategy to protect and to keep control from any uneven practice and a  
38 disciplinary act. They perceive that 'marriage' creates some responsibilities and accountabilities to wife  
39 and family.  
40  
41  
42  
43  
44  
45

46 There is definitely a gap between knowledge versus practice. Young males who are in school and have  
47 been part of various NGO led advocacy awareness programs on child marriage seem to 'know' about  
48 early child marriage and prevention issues – they also knew the 'correct' answers and responses to  
49 technical questions (like legal age of marriage, impact of early marriage etc.). But in practice and real life  
50 application of this knowledge, it was obvious that practice is more difficult than preaching. Ingrained  
51 values, beliefs and norms dominated everyday life choices and most adolescent young males subscribed  
52 to socially dominated gendered discriminated practices when it came to marriage. Though young males  
53 enjoys relatively greater degrees of gender privileges when it comes to decision making processes and  
54  
55  
56  
57

1  
2  
3 agency in choosing age, time and partners in marriages – but when it comes to their own sisters, most of  
4 them supported early marriage arrangements in support of family or parental decisions. Parental  
5 ownership and control over child's life and major landmark decisions, like marriage – dominates over  
6 every other forms of agency and freedom of young people, especially girls. Young males do exercise, in  
7 an increasingly more, powerful position within household, and this role is solidified with their economic  
8 power.  
9

10  
11 After parents, it is immediate and extended families, as well as kinship that play significant roles in  
12 shaping children's lives, when it comes to marriage. Reputation, acceptability, social position and  
13 respect – aspects of lives that are considered as prized possessions, especially in newly urbanized lives in  
14 slums, where survival can depend on social networks – neighbor's, local people and leaders' opinion on  
15 relationships and marriages matter. Often time of marriage is decided by these external forces even if  
16 the adolescent boy or his parents might want to decide otherwise.  
17

18  
19 Early marriage takes place for both girls and boys irrespective of what gender norms and values one  
20 might harbor. Adolescent boys negotiate a complex web of gender privilege, emerging adulthood,  
21 agency and social network and influences in making important decisions of life, like marriage. The  
22 matter of early marriage, for adolescent urban slum young males, is rarely a case of vulnerability and  
23 victimhood, like majority of their female counterpart. Agency, consent and desire to start family, sexual  
24 partnership, to run a household and provide support to parental households with additional (free) labor  
25 – are major reasons that influence adolescent boys' decision to marry earlier than legally sanctioned age  
26 by the state.  
27  
28  
29  
30

### 31 32 **Conclusion**

33  
34 Our study has revealed that the issue of early marriage, in low income urban slum contexts, has many  
35 different entry points for young males. Researches show that increasingly both young males and  
36 females are getting married early with their own consent, and in this research, it is evident that young  
37 males have greater voice and agency to give consent to marriage even if they are not technically (legally)  
38 adults.  
39

40  
41 From the findings of this research, we get a glimpse of how in low income socially vulnerable context of  
42 urban slums, adolescent young males negotiate adulthood processes in a complex but gender unequal  
43 spectrum of power and agency, and when it comes to marriage, these gendered power, privileges and  
44 agency pave pathways in asserting decisions that are otherwise not even legally granted to them.  
45  
46

47 In slum contexts, where space and livelihood is earned with a premium, and newly urbanized families  
48 struggle to find a footing in an already crowded and competitive city like Dhaka or Chittagong, there is a  
49 constant conflict, pull and push of norms, traditions and modernity – and young people are at the center  
50 of these shifting norms and ideas. The new realities of urban spaces bring new realities and definitions  
51 of adulthood, and we clearly see that adolescent young males find new agency with new economic  
52 prowess. In the context of the urban slums, the perceived phenomena of adulthood, decision making  
53 capability, aspiration towards marriage, family formation and sexuality influence the marriage decision  
54  
55  
56  
57

1  
2  
3 making process especially child marriage among the young males in the context of urban slums of  
4 Bangladesh.  
5

6 When an adolescent boy is considered as adult mainly based on his income ability and marital status, he  
7 is deprived of opportunities for his growth and development (8). Moreover, child marriage cut short the  
8 adolescence of young males and compromises their fundamental human rights. It affects their  
9 education, earning power and economic prospects, expectation, freedom, physical and psychological  
10 health and social life (8), however, nominal attention given to the vulnerabilities of young males(37, 38).  
11

12 Adolescent and young males' child marriage has many risk profiles that not only negatively affect their  
13 own situation but also have impacts on their partner's and family life. As long as child marriage  
14 prevention program only focuses girls with nominal focus on young males, it will be difficult to address  
15 child marriage holistically. A clear understanding about male's understandings, behavior and practice  
16 regarding child marriage are crucial to design interventions and programs to support this group of young  
17 men to stop child marriage.  
18  
19  
20  
21  
22  
23  
24

#### 25 **Author affiliations**

26 <sup>1</sup>BRAC James P Grant School of Public Health, BRAC University, Dhaka, Bangladesh

27 <sup>2</sup> Women's Studies and Feminist Research, University of Western Ontario, Canada

28  
29 Correspondence: Subas Biswas; [subasbiswas@gmail.com](mailto:subasbiswas@gmail.com)  
30  
31  
32  
33

34 **Acknowledgements** The authors would like to thank the study participants and BRAC field staffs for their  
35 assistance during field work. The authors also thank to the research team and data collectors.  
36

37 **Contributors** SFR and SB conceptualized and designed this study. SB analysed the data; SB and SK  
38 drafted, revised and finalized the manuscript. SFR, Principal Investigator of this study made final review  
39 and feedback on and supervised the manuscript. All authors read and approved the final manuscript.  
40  
41

42 **Funding** This work was supported by the research grant from International Development Research  
43 Centre, Ottawa, Canada; Grant number 108011-001.  
44

45 **Competing interests** None declared **Patient consent for publication** Not required  
46

47 **Ethics approval** The study received ethical approval from the Ethical Review Committee of BRAC James  
48 P Grant School of Public Health, BRAC University, Dhaka, Bangladesh (Ethics Reference No: 91, 18  
49 October 2016).  
50

51 **Data availability statement** Data are available upon reasonable request  
52  
53  
54  
55  
56  
57  
58  
59  
60

## References

1. Parsons J, Edmeades J, Kes A, Petroni S, Sexton M, Wodon Q. Economic impacts of child marriage: a review of the literature. *The Review of Faith & International Affairs* [Internet]. 2015; 13(3):[12-22 pp.]. Available from: <https://doi.org/10.1080/15570274.2015.1075757>.
2. Economic impacts of child marriage: global synthesis report [Internet]. 2017. Available from: <http://documents.worldbank.org/curated/en/530891498511398503/pdf/116829-WP-P151842-PUBLIC-EICM-Global-Conference-Edition-June-27.pdf>.
3. Patton GC, Sawyer SM, Santelli JS, Ross DA, Afifi R, Allen NB, et al. Our future: a Lancet commission on adolescent health and wellbeing. *The Lancet* [Internet]. 2016; 387(10036):[2423-78 pp.].
4. Svanemyr J, Chandra-Mouli V, Raj A, Travers E, Sundaram L. Research priorities on ending child marriage and supporting married girls. *Reproductive health*. 2015;12:80.
5. Haqrcr H. The Development of Global Responses to Child, Early and Forced Marriages 2017. Available from: <https://EconPapers.repec.org/RePEc:ess:wpaper:id:12245>.
6. Marcus R, Harper C. Social Norms, Gender Norms, and Adolescent Girls: a Brief Guide. London: ODI 2015. Available from: <https://www.odi.org/sites/odi.org.uk/files/odi-assets/publications...files/9818.pdf>.
7. Understanding and addressing child marriage: A scoping study of available academic and programmatic literature for the HER CHOICE Alliance [Internet]. Amsterdam Institute for Social Science Research (AISSR). 2016. Available from: <http://hdl.handle.net/11245.1/61e74e50-c05c-40c7-831c-ac634ae4b028>.
8. UNICEF. Early Marriage: Child Spouses. *Innocenti Digest No. 7*, March 2001. Florence, Italy: Unicef, Innocenti Research Centre 2001.
9. Mukherjee A, Sekher T. Do Only Girls Suffer? We Too! *Economic & Political Weekly*. 2017;52(1):75.
10. UNICEF. Child marriage: Child marriage threatens the lives, well-being and futures of girls around the world 2018. Available from: <https://data.unicef.org/topic/child-protection/child-marriage/>.
11. Greene ME, Perlson S, Taylor A, Lauro G. Engaging men and boys to address the practice of child marriage. Washington, DC: Greene Works. 2015.
12. Karim N, Greene M, Picard M. The cultural context of child marriage in Nepal and Bangladesh: Findings from CAREs Tipping Point Project. Community participatory analysis. Reserch report. CARE international, 2016.
13. Misunas C, Gastón CM, Cappa C. Child marriage among boys in high-prevalence countries: an analysis of sexual and reproductive health outcomes. *BMC international health and human rights* [Internet]. 2019; 19(1):[25 p.].
14. Gastón CM, Misunas C, Cappa C. Child marriage among boys: a global overview of available data. *Vulnerable Children and Youth Studies*. 2019:1-10.
15. Asia Child Marriage Initiative: Summary of research in Bangladesh India and Nepal [Internet]. Plan Asia Regional Office. 2013. Available from: <https://www.icrw.org/wp-content/uploads/2016/10/PLAN-ASIA-Child-Marriage-3-Country-Study.pdf>.
16. Solutions to end child marriage: what the evidence shows [press release]. 2011.
17. Khan TZ. Study: 80% slum girls victims of child marriage Dhaka: Kazi Anis Ahmed, 2A Media Limited; 2014 [Nov 13, 2018]. Available from: <https://www.dhakatribune.com/uncategorized/2014/05/22/study-80-slum-girls-victims-of-child-marriage>.
18. NIPORT, Associates Ma, International I. Bangladesh Demographic and Health Survey 2011. Dhaka, Bangladesh, and Rockville, Maryland, USA: 2013.

19. Adolescent girls' capabilities in Bangladesh: The state of the evidence [Internet]. 2017. Available from: [https://www.gage.odi.org/sites/default/files/2018-02/Bangladesh%20Capabilities%20Report\\_0.pdf](https://www.gage.odi.org/sites/default/files/2018-02/Bangladesh%20Capabilities%20Report_0.pdf).
20. Rashid SF. Human rights and reproductive health: political realities and pragmatic choices for married adolescent women living in urban slums, Bangladesh. BMC international health and human rights [Internet]. 2011; 11(3):[S3 p.]. Available from: <http://www.biomedcentral.com/1472-698X/11/S3/S3>.
21. Rashid SF. Marriage practices in an urban slum: vulnerability, challenges to traditional arrangements and resistance by adolescent women in Dhaka, Bangladesh. 2006.
22. UNICEF. Early marriage a harmful traditional practice : a statistical exploration. New York: UNICEF; 2005. Available from: [http://www.unicef.org/publications/files/Early\\_Marriage\\_12.lo.pdf](http://www.unicef.org/publications/files/Early_Marriage_12.lo.pdf).
23. GoB. Child Marriage Restraint Act, 2017 (Act No. 6 of 2017). 2017.
24. Hossain S. Legal Remedies for Forced Marriage in Bangladesh. In: Hossain S, Welchman L, editors. Remedies for Forced Marriage: A Handbook for Lawyers: Interights - The International Centre for the Legal Protection of Human Rights 2014.
25. Rights CFR. Ending Impunity for Child Marriage in Bangladesh: Normative and implementation gaps. 2018.
26. Baden S, Green C, Goetz AM, Guhathakurta M. Background report on gender issues in Bangladesh: University of Sussex:Institute of Development Studies; 1994.
27. Koster W, Miedema E, Hodgkinson K, Pouw N, Meyer P. Her Choice Baseline Study Synthesis Report. Amsterdam The Amsterdam Institute for Social Science Research, 2017.
28. Rao N. Breadwinners and homemakers: Migration and changing conjugal expectations in rural Bangladesh. Journal of Development Studies [Internet]. 2012; 48(1):[26-40 pp.]. Available from: <http://dx.doi.org/10.1080/00220388.2011.629648>.
29. Cairns RB, Leung MC, Buchanan L, Cairns BD. Friendships and social networks in childhood and adolescence: Fluidity, reliability, and interrelations. Child development. 1995;66(5):1330-45.
30. Hasam MA, Mushahid M. Drug Addiction in Urban Life of Bangladesh: A Sociological Study for Exploring the Causes. Asia Pacific Journal of Multidisciplinary Research [Internet]. 2017; 5(2). Available from: [www.apjmr.com/wp-content/uploads/2017/04/APJMR-2017.5.2.01.pdf](http://www.apjmr.com/wp-content/uploads/2017/04/APJMR-2017.5.2.01.pdf).
31. BBS. Child Labor Survey 2013. Dhaka: Bangladesh Bureau of Statistics, Ministry of planning, 2015.
32. Asekun-Olarinmoye OS, Asekun-Olarinmoye EO, Adebimpe WO, Omisore AG. effect of mass media and internet on sexual behavior of undergraduates in Osogbo metropolis, southwestern nigeria. Adolescent health, medicine and therapeutics [Internet]. 2014; 5:[15 p.].
33. Owens EW, Behun RJ, Manning JC, Reid RC. The impact of Internet pornography on adolescents: A review of the research. Sexual Addiction & Compulsivity. 2012;19(1-2):99-122.
34. Dickson-Gomez J, Quinn K, Broaddus M, Pacella M. Gang masculinity and high-risk sexual behaviours. Culture, health & sexuality [Internet]. 2017; 19(2):[165-78 pp.].
35. Unicef. The State of the World's Children-Special Edition: Celebrating 20 Years on the Convention on the Rights of the Child: Executive Summary: Unicef; 2009.
36. Islam A. Crime and Delinquency among Slum Children of Dhaka City: A Sociological Study: Dhaka University Institutional Repository Policy; 2014.
37. Lancet T. Adolescent health: boys matter too. The Lancet. 2015;386(10010):2227.
38. Peate I. Male adolescent health and wellbeing matters too. British Journal of School Nursing [Internet]. 2016; 11(1):[33-5 pp.].

This consolidated criteria for reporting qualitative studies (COREQ) checklist for this article are described as follows-

| No Item                                        | Description                                                                                                                                                                                                                                                                                                                                                                                         |
|------------------------------------------------|-----------------------------------------------------------------------------------------------------------------------------------------------------------------------------------------------------------------------------------------------------------------------------------------------------------------------------------------------------------------------------------------------------|
| <b>Domain 1: Research team and reflexivity</b> |                                                                                                                                                                                                                                                                                                                                                                                                     |
| <b>Personal Characteristics</b>                |                                                                                                                                                                                                                                                                                                                                                                                                     |
| 1. Interviewer/facilitator                     | SubasBiswas with other researchers conducted the interviews and focus group discussion sessions. Sabina F Rashid trained researchers how to conduct interviews and focus group                                                                                                                                                                                                                      |
| 2. Credentials                                 | All of the researchers had minimum Master's degree in Anthropology, Public Health or Social Science Whereas Sabina F Rasid and ShuchKarim have PhD degree.                                                                                                                                                                                                                                          |
| 3. Occupation                                  | All of the researchers were full time engaged in this research; however, Sabina F Rashid and ShuchiKarim were also involved in teaching in universities.                                                                                                                                                                                                                                            |
| 4. Gender                                      | There were a group of researchers and both male and females researchers were in this group                                                                                                                                                                                                                                                                                                          |
| 5. Experience and training                     | All of the researchers had prior experience in conducting research. Moreover, all of the researchers were gone through several training and workshop sessions for present study                                                                                                                                                                                                                     |
| <b>Relationship with participants</b>          |                                                                                                                                                                                                                                                                                                                                                                                                     |
| 6. Relationship established                    | Prior to data collection a good rapport was established with each respondents and also community people. The researchers spent several weeks in the field and collected data.                                                                                                                                                                                                                       |
| 7. Participant knowledge of the interviewer    | Participants were informed about the researcher's identity, objectives and involvement in this study.                                                                                                                                                                                                                                                                                               |
| 8. Interviewer characteristics                 | Researcher informed participants about their designation, affiliation of the organization, aims and objectives of the study and what the involvements of the researchers in this study were. Participants were also informed how researchers would use this data and what would be the role of the researchers in presenting information to other audiences.                                        |
| <b>Domain 2: study design</b>                  |                                                                                                                                                                                                                                                                                                                                                                                                     |
| <b>Theoretical framework</b>                   |                                                                                                                                                                                                                                                                                                                                                                                                     |
| 9. Methodological orientation and Theory       | Content and thematic analysis were done to underpin the study                                                                                                                                                                                                                                                                                                                                       |
| <b>Participant selection</b>                   |                                                                                                                                                                                                                                                                                                                                                                                                     |
| 10. Sampling                                   | Purposive and snowballing methods were used to select participants                                                                                                                                                                                                                                                                                                                                  |
| 11. Method of approach                         | Participants were approached face-to-face                                                                                                                                                                                                                                                                                                                                                           |
| 12. Sample size                                | The broader research project collected both quantitative and qualitative data using questionnaire survey with 2136 adolescent girls and young women aged 13-24 years and 96 In-depth interview (IDI), and 12 focus group discussion (FGD) were conducted with married and unmarried adolescents and young girls and boys aged 15-24 years, their parents and 33 key-informant interviews (KII) with |

|                                        |                                                                                                                                                                                                                                                                                                                                                                                                                                                                                                                                                                        |
|----------------------------------------|------------------------------------------------------------------------------------------------------------------------------------------------------------------------------------------------------------------------------------------------------------------------------------------------------------------------------------------------------------------------------------------------------------------------------------------------------------------------------------------------------------------------------------------------------------------------|
|                                        | <p>community leaders, teachers, marriage registrars and program people.</p> <p>However, this present article used 22 In-depth interviews (IDIs) and 3 focus group discussions (FGD) with married and unmarried adolescent and young males aged 15-24 years; 13 IDIs and 4 FGDs with parents and 11 key-informant interviews (KIIs) with community leaders.</p>                                                                                                                                                                                                         |
| 13. Non-participation                  | About 10-12 young male respondents refused to participate in this study as they were not interested or they had no time enough to spend time as most of the interviews were conducted at the day tome and these potential participants were engaged in work during day time.                                                                                                                                                                                                                                                                                           |
| <b>Setting</b>                         |                                                                                                                                                                                                                                                                                                                                                                                                                                                                                                                                                                        |
| 14. Setting of data collection         | All of the interviews were conducted at participants own setting, whether it was in their home or near to their home where they felt comfort to talk.                                                                                                                                                                                                                                                                                                                                                                                                                  |
| 15. Presence of non-participants       | <p>When interviews were conducted in participant's own home, there were family members near to the interview sessions in some cases. But they were not present full time of the interview sessions.</p> <p>One researcher conduct one interview and audio recorder was used to record all of the conversations with the informed consent of the participants.</p> <p>Two researchers were involved to conduct focus group discussions session. Here researchers also used audio recorder to record all of the conversations with informed consent of participants.</p> |
| 16. Description of sample              | The sample characteristics include age, marital status, age at marriage, income and job status                                                                                                                                                                                                                                                                                                                                                                                                                                                                         |
| <b>Data collection</b>                 |                                                                                                                                                                                                                                                                                                                                                                                                                                                                                                                                                                        |
| 17. Interview guide                    | Data were collected using pretested guidelines phase by phase in two study sites                                                                                                                                                                                                                                                                                                                                                                                                                                                                                       |
| 18. Repeat interviews                  | No repeat interviews were conducted                                                                                                                                                                                                                                                                                                                                                                                                                                                                                                                                    |
| 19. Audio/visual recording             | The research use audio recording with informed consent of the participants to collect the data                                                                                                                                                                                                                                                                                                                                                                                                                                                                         |
| 20. Field notes                        | Field note were taken during and after the In-depth Interview (IDI) and Focus Group discussion (FGD) and also key-Informant Interviews(KII)                                                                                                                                                                                                                                                                                                                                                                                                                            |
| 21. Duration                           | For IDIs, the duration was about 90-100 minutes,<br>For FGDs, the duration was about 120-150 minutes<br>For KIIs, the duration was about 60-80 minutes                                                                                                                                                                                                                                                                                                                                                                                                                 |
| 22. Data saturation                    | Data saturation was not discussed                                                                                                                                                                                                                                                                                                                                                                                                                                                                                                                                      |
| 23. Transcripts returned               | Transcripts were not returned to participants for comment or correction                                                                                                                                                                                                                                                                                                                                                                                                                                                                                                |
| <b>Domain 3: analysis and findings</b> |                                                                                                                                                                                                                                                                                                                                                                                                                                                                                                                                                                        |
| <b>Data analysis</b>                   |                                                                                                                                                                                                                                                                                                                                                                                                                                                                                                                                                                        |
| 24. Number of data coders              | Eight data coders coded the data                                                                                                                                                                                                                                                                                                                                                                                                                                                                                                                                       |



|                                    |                                                                                                                                                         |
|------------------------------------|---------------------------------------------------------------------------------------------------------------------------------------------------------|
| 25. Description of the coding tree | The authors did not provide a description of the coding tree                                                                                            |
| 26. Derivation of themes           | Themes were derived from the data                                                                                                                       |
| 27. Software                       | Atlasti (version 8) software was used to manage the data                                                                                                |
| 28. Participant checking           | Participants did not check the findings                                                                                                                 |
| <b>Reporting</b>                   |                                                                                                                                                         |
| 29. Quotations presented           | Participant quotations are presented to illustrate the findings. Basic characteristics of these participants were also presented with these quotations. |
| 30. Data and findings consistent   | Consistency between the data and findings are discussed                                                                                                 |
| 31. Clarity of the major themes    | Major themes are clearly presented in the findings                                                                                                      |
| 32. Clarity of minor themes        | A description of diverse cases and discussion of minor themes are also presented                                                                        |

# BMJ Open

## Should we care: A qualitative exploration of the factors influence the decision of early marriage among young males in urban slum of Bangladesh.

|                                 |                                                                                                                                                                                                                                  |
|---------------------------------|----------------------------------------------------------------------------------------------------------------------------------------------------------------------------------------------------------------------------------|
| Journal:                        | <i>BMJ Open</i>                                                                                                                                                                                                                  |
| Manuscript ID                   | bmjopen-2020-039195.R1                                                                                                                                                                                                           |
| Article Type:                   | Original research                                                                                                                                                                                                                |
| Date Submitted by the Author:   | 25-Jun-2020                                                                                                                                                                                                                      |
| Complete List of Authors:       | Biswas, Subas; BRAC University James P Grant School of Public Health, CGSRHR<br>Karim, Shuchi; BRAC University James P Grant School of Public Health, Rashid, Sabina Faiz; BRAC University James P Grant School of Public Health |
| <b>Primary Subject Heading</b>: | Public health                                                                                                                                                                                                                    |
| Secondary Subject Heading:      | Sexual health, Public health                                                                                                                                                                                                     |
| Keywords:                       | Health policy < HEALTH SERVICES ADMINISTRATION & MANAGEMENT, QUALITATIVE RESEARCH, Risk management < HEALTH SERVICES ADMINISTRATION & MANAGEMENT, Change management < HEALTH SERVICES ADMINISTRATION & MANAGEMENT                |
|                                 |                                                                                                                                                                                                                                  |

SCHOLARONE™  
Manuscripts

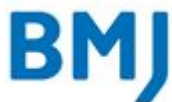

I, the Submitting Author has the right to grant and does grant on behalf of all authors of the Work (as defined in the below author licence), an exclusive licence and/or a non-exclusive licence for contributions from authors who are: i) UK Crown employees; ii) where BMJ has agreed a CC-BY licence shall apply, and/or iii) in accordance with the terms applicable for US Federal Government officers or employees acting as part of their official duties; on a worldwide, perpetual, irrevocable, royalty-free basis to BMJ Publishing Group Ltd ("BMJ") its licensees and where the relevant Journal is co-owned by BMJ to the co-owners of the Journal, to publish the Work in this journal and any other BMJ products and to exploit all rights, as set out in our [licence](#).

The Submitting Author accepts and understands that any supply made under these terms is made by BMJ to the Submitting Author unless you are acting as an employee on behalf of your employer or a postgraduate student of an affiliated institution which is paying any applicable article publishing charge ("APC") for Open Access articles. Where the Submitting Author wishes to make the Work available on an Open Access basis (and intends to pay the relevant APC), the terms of reuse of such Open Access shall be governed by a Creative Commons licence – details of these licences and which [Creative Commons](#) licence will apply to this Work are set out in our licence referred to above.

Other than as permitted in any relevant BMJ Author's Self Archiving Policies, I confirm this Work has not been accepted for publication elsewhere, is not being considered for publication elsewhere and does not duplicate material already published. I confirm all authors consent to publication of this Work and authorise the granting of this licence.

## Title page

**Title of the paper:** Should we care: A qualitative exploration of the factors influence the decision of early marriage among young males in urban slum of Bangladesh.

**Authors:** Subas Biswas, Shuchi Karim, Sabina Faiz Rashid

**Corresponding author:** Shuchi Karim, Assistant Professor, Women's Studies and Feminist Research, University of Western Ontario, Canada. Contact detail: shuchikarim2006@gmail.com; skarim63@uwo.ca; Phone # +1 4379851973; ORCID identifier is 0000-0002-2770-8784, author's full ORCID ID and the link is <https://orcid.org/0000-0002-2770-8784>

**Details of Co-authors:**

Subas Biswas, Senior Research Fellow, James P. Grant School of Public Health, BRAC University, Dhaka, Bangladesh. E-mail: subasbiswas@gmail.com

Sabina Faiz Rashid, Dean and Professor, James P. Grant School of Public Health, BRAC University, Dhaka, Bangladesh. E-mail: Sabina@bracu.ac.bd

**Key words:** Early marriage, Young males, Urban slums, Bangladesh

**Word count:** 9233

## Main text

### Should we care: A qualitative exploration of the factors influence the decision of early marriage among young males in urban slum of Bangladesh.

Subas Biswas<sup>1</sup>, Shuchi Karim<sup>1,2</sup>, Sabina Faiz Rashid<sup>1</sup>

#### Abstract

**Objectives** To explore how adolescent and young males negotiate the complex realities of lives to explain their pathways into and reasons for early marriage in urban slum of Bangladesh.

**Design** The Qualitative data used here came from a larger three years study that used both quantitative and qualitative research methods.

**Setting** Interviews were conducted in two of the largest slums in Dhaka and Chittagong city of Bangladesh between December 2015 and March 2018.

**Participants** This paper uses qualitative data from 22 In-depth interviews (IDIs) and 3 focus group discussions (FGD) with adolescent and young males aged 15-24 years; 13 IDIs and 4 FGDs with parents and 11 key-informant interviews (KIIs) with community leaders. The purposively selected respondents were interviewed in their respective settings.

**Results** In the context of urban slums, this study revealed multiple factors influence early marriage decision making processes among young males. These factors include socially perceived phenomenon of adulthood and readiness of marriage, poverty leading to drop out from schools and early initiation to earning livelihood, manifestations of increasing individual aspiration and agency, fulfillment of romance and erotic desires, and dreams of forming one's own family. In addition parental and immediate societal interference to preserve norms around gender and society can act as catalysts for this decision.

**Conclusions** Study findings imply that complex structural factors, social and gender norms that are contributing to the early marriage for both adolescent boys and young males in Bangladesh's urban slums. These are locations where conservatism, poverty and urbanization intersect resulting in early and often unprepared entry to adulthood for young males impacting on their development and wellbeing. It is therefore, critical that young males should be included in the national and global conversations around child marriage and child marriage prevention program.

Key words: Early marriage, Young males, Urban slums, Bangladesh

#### Strengths and limitations of this study

- This is one of the pioneering studies in the context of urban slums in Bangladesh which explored the complex realities, pathways into and reasons for early marriage of adolescent and young males. .

- The in-depth qualitative data were collected using follow-up interview sessions spending long days with respondents to capture and understand holistic scenario of the realities and practices of early marriage.
- Data collected from two slums of two cities may not represent the whole adolescent and young males realities of other slums in Bangladesh but nevertheless this marks the beginning of an exploration to an otherwise ignored group of adolescents from early marriage discussions.
- Due to the issue sensitivity, our respondents might have some conservativeness to open up and alter the information.

## Introduction

Child marriage is a major public health concern particularly in developing countries like Bangladesh. The agenda of 'child marriage' as it pertains to girls has been extensively researched, reviewed and advocated in an effort to eradicate the practice of Early and Child Marriage (ECM) and to comprehend how it impacts the social, cultural, health and economic identity of young girls[1-5]. Most of the existing literature shows that the root causes of child marriage of girls are poverty, gender discrimination, discriminative social norms, patriarchal attitude, lack of awareness and legal loopholes[6,7]. However, there is a huge knowledge gap in regards to young males' ECM and its impact on their lives [8]. Nevertheless, young males also suffer as their early marriage practices can bring early fatherhood, lack of educational and subsequent better job opportunities— all of which can limit their socio-economic prospects in life, creating pressure to have increased income to provide economic support for family and children. Early life responsibilities, affect their life expectation, freedom. Like in case of girls, early marriage can have negative impacts on the physical, mental and sexual health development of young males especially in low resource environments. [9-13].

Although the prevalence of child marriage among boys and young males are lower than that of girls, however, this is not an uncommon phenomenon. In a recent analysis, UNICEF reported that globally, 115 million boys were married before the age of 18. Among them, one in five was wedded before his 15th birthday[14]. An evaluation of 82 low and middle income countries data showed that about one in twenty-five boys marry before they turn 18. However, in South Asian context, this rate is 5%[15-16]. The Bangladesh demographic health survey (BDHS) 2011 stated that about four per cent of men aged 20-24 in Bangladesh get married by the age of 18[17].

Despite this significant figure, there is a dearth of knowledge about young males/adolescent grooms, which essentially means that millions of young males are almost non-existent and/or invisible from past and ongoing research, advocacy, policy and preventive programs addressing early and child marriage. A handful of recent researches indicate that in urban slums in Bangladesh, there is an increasing trend for young males to marry before legal age of marriage[18]. Keeping this rising but mostly unaddressed issue of ECM of young males in general, and in urban low income/slum context in Bangladesh, this paper aims at understanding the factors influencing and contributing to the causes of early marriage among young

1  
2  
3 males, and what implications does this have on the discourse as well as interventions related to early  
4 marriage prevention strategy for all stakeholders. The paper also aims to engage with a deeper  
5 understanding of masculinity and sexuality – which hopefully will contribute in a more nuanced analysis  
6 of gender and marriage as a social construction in the hetero patriarchal society of Bangladesh.  
7

8  
9 The paper is divided into the following sections: 1) Contextual & conceptual framework or background,  
10 2) methodology, 3) Results, 4) Discussion and 5) Conclusion.  
11  
12  
13

## 14 **Section 1: Contextual Background**

### 15 ***Early marriage and Young males: Context of Slums in Bangladesh***

16  
17 A survey conducted in some selected slums in Dhaka, Bangladesh reported that approximately 80% of  
18 the females and 46% of the males in the slums are the victims of child marriage [18]. Early literature also  
19 explored how poor socioeconomic condition in the context of slums, can make adolescents more  
20 vulnerable to be victims of child marriage[19,20]. In urban slums context of Bangladesh, adolescents  
21 living in exacerbated socio-economic conditions, lack access to correct information, education and life  
22 opportunities. Life of poverty, uncertainties, fear of displacement, violence and social insecurity  
23 inevitably increase the risks of adolescent young males engaging in various harmful practices (i.e. gang  
24 involvement, unsafe sexual practices, drugs etc.). These risk factors intersecting with societal gendered  
25 expectations about male roles and masculinity harm their development and wellbeing[21]. Therefore,  
26 these new phenomena of child marriage practice amongst young males in low income, high population  
27 density urban slum context which are usually not discussed or focused on, but it is important to  
28 understand factors that are shaping early marriage trends. This has implications not only the young  
29 males' emotional well-being and health but also on their young counterparts, children and extended  
30 families.  
31  
32  
33

### 34 **Framing marriageable age**

35  
36 Internationally 18 years is set for adulthood and marriage for males[22], however, Bangladesh has set  
37 legal age for marriage for males at 21 years. Though there is a provision that marriage can be arranged  
38 before this age in special circumstances with consent of legal guardians with a court  
39 order[23]. Moreover, marriage in Bangladesh is largely regulated by personal laws which allow marriage  
40 before 18 for both boys and girls[24, 25]. Thus, legal loopholes and dominance of personal laws along  
41 with many other religious and customary provisions create multiple challenges to prevent child marriage  
42 in the patriarchal society of Bangladesh[26].  
43  
44

45  
46 The perceptions of marriageable age for girls and boys come from the basic social construction of  
47 gender roles in relation to marriage where the male is ideally responsible for financial care of household,  
48 to be the provider and protector of the woman/wife. On the other hand woman/wife is expected to be  
49 responsible for household, care and reproduction[27]. This binary gender roles of provider and  
50 dependent creates an uneven gender power relation, tilted favorably towards the man in terms of  
51 decision making. In other words, a man's eligibility centers on financial capacity and virility, while a  
52 woman's eligibility is centered on her sexual and reproductive ability. However, the issues around the  
53 social construction of boy's marriageable age is much more complex, something that remains  
54 unaddressed and unchallenged.  
55  
56  
57

## Boys and young males in the sexual and reproductive health and rights (SRHR) and Child marriage framework

The SDGs have prioritized on 'leaving no one behind' regarding health and wellbeing, education and gender equality with specified targets in goals 3, 4 and 5 to increase access to SRHR for all. Furthermore, Bangladesh government has also set a target to end child marriage by 2041. Therefore, this paper is particularly positioned in the SRHR and child marriage discourse framework. There is a lack of sense of urgency in addressing the issue of boys and young men within the child marriage space.

### Section 2: Methods

This paper is drawn from a broader research project conducted to investigate the underlying issues that lead to early, child and forced marriages in the contexts of urban slums and specific realities of life in urban slums that lead families to choose child marriage for their children or adolescents to opt for early marriage for them.

#### Study settings, respondents and data collection methodology

The broader study was conducted in two purposively selected slums: Bhashantek slum and Shantinagar slum located within Dhaka (capital city) and Chittagong (industrial city) city corporations respectively; two of the oldest and largest urban slums in Bangladesh.

Broader research project collected both quantitative and qualitative data using questionnaire survey with 2136 adolescent girls and young women aged 13-24 years and 96 In-depth interview (IDI), and 12 focus group discussion (FGD) were conducted with married and unmarried adolescents and young girls and boys aged 15-24 years, their parents and 33 key-informant interviews (KII) with community leaders, teachers, marriage registrars and program people.

To understand the reasons and pathways into child marriage among young males, this paper uses qualitative data from 22 In-depth interviews (IDIs) and 3 focus group discussions (FGD) with married and unmarried adolescent and young males aged 15-24 years; 13 IDIs and 4 FGDs with parents and 11 key-informant interviews (KIIs) with community leaders. Among 22 IDIs with adolescent and young males, 12 were early married and 10 were unmarried. As the main target respondents were adolescent and young males (aged 15-24), the socio-demographic background characteristics of the 22 IDI respondents are presented in Table 1.

Table 1: Socio-demographic background of the In-depth Interviewed (IDI) adolescent and young male respondents in Bhashantek, slum of Dhaka and Shantinagar slum of Chittagong, Bangladesh (n=22)

| Socio-demographic Characteristics | Bhashantek (n=13) |                 | Shantinagar (n=9) |                 |
|-----------------------------------|-------------------|-----------------|-------------------|-----------------|
|                                   | Married (n=7)     | Unmarried (n=6) | Married (n=5)     | Unmarried (n=4) |
| Age (years)                       |                   |                 |                   |                 |
| 18-20                             | 2                 | 5               | 1                 | 3               |
| 21-24                             | 5                 | 1               | 4                 | 1               |
| Education (years of education)    |                   |                 |                   |                 |
| <5                                | 4                 | 2               | 3                 | 2               |



|                         |   |   |   |   |
|-------------------------|---|---|---|---|
| 5 to 9                  | 2 | 1 | 2 | 1 |
| 10 to 12                | 1 | 2 |   | 1 |
| Age at marriage (years) |   |   |   |   |
| <17                     | 4 |   | 2 |   |
| 18-19                   | 1 |   | 2 |   |
| 20                      | 2 |   | 1 |   |
| Current Income status   |   |   |   |   |
| Having regular income   | 1 | 2 | 2 | 3 |
| Having irregular income | 3 | 1 | 2 | 1 |
| No income               | 3 | 3 | 1 |   |

All of the study participants for qualitative method were purposively selected using snowball techniques covering diverse groups. The question guide aimed to extract information regarding the perception, attitude and practice towards marriage, early marriage and their expectations from marriage and in married life. The guideline also included questions to understand the context that influences to young males to get married early and what are the roles they play in these circumstances leading to their marriage, in the decision-making process. After collecting data, verbatim transcript and translation were done of interview recordings, data were coded using Atlasti, followed by thematic analysis.

Data were collected using pretested guidelines phase by phase in two study sites from December 2015 to March 2018 by trained interviewers. All the interviews took place at the participant's own settings. Written informed consent was obtained from all the interview participants. The ethical approval of the study was obtained from the ethical review committee of the BRAC James P. Grant School of Public Health (JPGSPH), BRAC University, Dhaka, Bangladesh.

### **Patient and public involvement**

Neither patients nor community people of the study sites were involved during the design and development of the study. However, the study team sought expert consultation meetings with the key persons from the academia, researchers as well as practitioners and policy makers. The study results are also shared with national and international communities for advocacy.

## **Section 4: Results: Reasons of early marriage among young males in urban slums**

(Pseudonyms are used to maintain confidentiality)

Findings revealed that there are many underlying factors that influence a boy's decision to get married early within the context of the urban slum. Theme 1 describes the perception of adulthood among the respondents and how this influence marriage decision making. Theme 2 states the practices and pathways to making of child marriage decision. Under this theme 2, several sub-themes are identified: capacity to earn a living and play role of a breadwinner, to ensure a fruitful endings of romantic relationship, to fulfill sexual desire, aspiration to form a family and expand social support network through kinship, and finally parental perception of 'protecting' family 'honor' as well the need to

1  
2  
3 'stabilize' a boy's future. However, decisions pertaining to child marriages of young males are not made  
4 in isolation or made specific to one of these factors.  
5

### 6 **Theme 1: Perceptions of adulthood, being a 'real man' and readiness for marriage**

7  
8 Regarding perception of adulthood, data from IDI and FGD with male respondents and their parents, it  
9 was revealed that there were two stages *na-balok* (*balok*, is a noun, a male child of 15/16 years of age,  
10 indicating a state of inexperience and lack of understanding. *na-Balok* is an adjective, not-adult,  
11 underage, someone who is not yet old enough to get citizenship rights) and *sa-balok* (adjective, adult or  
12 coming of age), which conceptually and colloquially mean childhood and adulthood respectively. The  
13 applications of these concepts are for male youth usually aged 13-24. From parent's point of views, *na-*  
14 *balok* is not a specific age, but rather a life stage when young males are under parent's care, not capable  
15 of understanding and differentiating between what is good or bad for them. It also implies lack of  
16 financial capacity as they are not able to generate steady income or take responsibilities for themselves  
17 or families. One the other hand, when a boy can earn, he is understood to be capable in differentiating  
18 between good or bad, take responsibilities – therefore, irrespective of the actual age, this capacity of  
19 earning and awareness of the world grants him adulthood, and he transitions from being a '*na-balok*' to  
20 a '*sa-balok*'.  
21  
22  
23  
24

25 *"A boy is considered as a man (baro hoyese-become grown up or adult) when he can work and*  
26 *earn enough to feed his parents and family members. He can understand good or bad things for*  
27 *his life and capable of taking his own decisions - the right decisions. He can take responsibilities*  
28 *of his own and also a wife . . . then he can marry as he has capacity to feed his wife including his*  
29 *parents."* (Mother of adolescents, 55yrin FGD, Bhashantek slum)  
30  
31

32 Adulthood for a boy includes capacity to take responsibilities of his immediate family along with the  
33 potential of taking a wife, thus starting his own family on time. Therefore, adulthood for male gender is  
34 about having the capacity of becoming a breadwinner and fulfilling society given gendered responsibility  
35 of ultimately becoming head of the extended household – not only with the purpose of a nuclear unit of  
36 his own. Here, age is just a number, and adulthood relates to social and gendered concepts of roles and  
37 norms. And when a boy earns these characteristics of adulthood, he is also granted the right of marriage  
38 and considered a 'real man'.  
39  
40

41 But we also see change in this social concept and practice of adulthood in relation to manhood for  
42 young males, as increasing exposure to education and social advocacy awareness programs convince  
43 young men to marry at a later age:  
44  
45

46 *"For adult, 18 is not enough, you need more 6-7 years You need job and income, enough income.*  
47 *. . . Before 27-28-30 (years of age), you will not be able to establish financially. Only age,*  
48 *physical growth is not enough (to be an adult)".* (Unmarried boy, age 21, in FGD, Shantinagar  
49 slum)  
50  
51

52 There is also awareness that income only cannot make a young male ready for big responsibilities of life,  
53 like marriage. In the context of Bangladesh, and increasing financial hardship, some felt that it is okay for  
54 a male to delay or stretch the boundaries of marriage age as long as needed. Higher the educational  
55 aspiration and qualification the later he is able to financially become independent and hence delay the  
56  
57

1  
2  
3 marriage. But the bottom line of either side of the argument is that age of marriage for a young male is  
4 dependent on being perceived as a financially capable man, who is ready to take on family  
5 responsibilities – depending on whatever socio-economic-educational background one belongs to – but  
6 never depending on what the legal framework might dictate.  
7

8  
9 It is important to briefly compare perceptions of boy's age of marriage with that of girls by the same  
10 respondents as it clearly indicates differences in norms and practices based on genders. A girl's  
11 readiness for marriage is viewed as being dependent on her biology, at the wake of puberty. When a girl  
12 reaches puberty, her body shows physical forms of womanhood and reaches menarche – she is believed  
13 to be ready for marriage. The social understanding of girl's purpose and readiness of marriage is her  
14 capacity of reproduction, to be able to take care of household responsibilities and be in service of her  
15 husband and in laws. Financial dependence, not independence is a primary concern for girl's marriage as  
16 female gender is considered as responsibility (and burden) for her male custodians (Father, brother  
17 and/or husband). Therefore, reasons influencing the age and readiness of marriage for male and female  
18 have almost polar opposite positioning of age, income and responsibilities. In the poor socio-economic  
19 contexts of slums in Bangladesh, adolescents have to play adult' roles for which they are not ready for-  
20 be it marriage or income generating activities. For the greater benefits of their families they have to  
21 engage in income generating activities earlier to extend financial help to their family (in case of young  
22 males), or marry into another family (in case of girls) – as a strategy for their respective survival. Thus,  
23 community people, parents, even young males in both slums considered income of a boy as the primary  
24 attribute to be able to get married.  
25  
26  
27  
28  
29  
30  
31

## 32 **Theme 2: Decision and pathway into early child marriage of young males**

33 The data revealed that a very common pathway of young males' lives in urban slums is poverty that  
34 results in discontinuation of education. Even though young males, because of their social privileges of  
35 gender get priorities in families to continue education, usually – poverty is nevertheless a reason for  
36 them to drop out from school due to lack of financial resources. There is also an additional reason of  
37 peer pressure as young males from similar age group and backgrounds tend to drop out of schools for  
38 various reasons and manage to secure some kinds of job or the other in the informal sector as they are  
39 expected to support the family. Seeing peers earning money and gaining independence and markers of  
40 adulthood – encouraged many to leave school and aspire to earn, take control of life decisions and feel  
41 that they are adults. Besides these, many of the young males get married early to bring fruition to their  
42 romantic relationships, to fulfill their desires to form a family and expand social support network  
43 through kinship, and finally to fulfill newly found sexual desire, which can continue under the umbrella  
44 of marriage. Many times parents and families also encourage and support young males at a young age  
45 to fulfill these desires and aspirations to start their adult lives as it is considered to socially more  
46 acceptable and respectable to organize marriage by families than allowing children to elope or take  
47 independent decisions.  
48  
49  
50  
51  
52  
53  
54  
55  
56  
57  
58  
59  
60

## 2.1 Out of school, engaging in income generation: Gaining agency and sense of adulthood

As presented in previous section adulthood and age of marriage for young males in urban slums are primarily gained through work and economic capacity before reaching legal age of adulthood. Slum populations are consisted of internally migrated people/families from rural areas often caused by poverty, displacement and economic aspirations for better future in the cities. Slum dwelling is also a socio-economically instable reality for its dwellers live a marginalized existence with a constant threat of evictions and lack of basic amenities. The pressure to earn a living to keep households running is on almost every member of slum households, especially on young males because of their gender. This happens in households where the father is either not working, or has died, or has left the household or there is a stepparent who is unwilling to support the rest of the household. These social and economic instabilities in slum communities lead a majority of adolescent boys to drop out of school if they were studying and become early seekers of employment. IDI and FGD with young males and parents found that school dropout is very common in urban slums and the most cited reason is lack of financial support. Parents prefer to send their young sons to work so as to provide the family with additional income and ease the burden of ever increasing expenditures of urban living, Sometimes, because of the pressure of economic uncertainties, adolescent young males themselves often decide to drop out of school and engage in income-generating activities.

Generating income for a household also translates into a sense of power, agency and ability to reposition oneself within a household. For young males, even though circumstances might push them to assume their ultimate gender role of the head of household at a much early age, this eventually grants them some unprecedented freedom to make decisions for themselves. The transition to '*sa-balak*' status through assuming financial responsibility for an entire household translates into some degrees of control regarding their personal lives. Sariful, a 23 year old young man in Bhashantek slum, got married at 20, explained the context of economic freedom, agency and decision making process-

*'I had an income. . . I could feed a family. I don't know whether I was at the marriageable age or not but personally I think, I was ready to get married. So, I did (got married).. . I think, age was never a problem.'*

During a KII, a male community leader (55 years old) in Bhashantek slum explained it further:

*"As he (a boy) earns and feeds his family members, parents also have some kinds of economical dependency. If he (the boy) wants to marry, parent may try to prohibit or may not readily agree to his proposal but they cannot create pressure. If they do so, the boy may be get married by himself without the consent of his parents. It is disgraceful (for parents). So, parents agree with such marriage."*

Thus, the idea of having income and potential responsibilities and capacities to take care of a wife define the age of marriageable stage and this lead young male to the decision of marriage.

## 2.2 Desire for family formation, building kinship and expansion of social networks: Marriage as a medium of social and economic stability

Sariful, a 23 years old young male, married at 20, talks about role of marriage as a pathway or means to bringing regularity and stability in one's life. His father remarried after his mother's death and lived in a separate household in the same slum as Sariful and his brother. He feels that marriage brought back some stability, motivation and discipline in his life, which was very much lacking when he lived without a guardian or loved one:

*"Before my marriage, I had enough earnings and could feed my family members. But I would spend all my money to buy cloths, hang out with friends and at the end of the month, I was empty handed. Then I thought, if I get married, I would have to push myself to work hard and earn more. I thought, I need a family life otherwise I wouldn't be going forward with my life."*  
(Sariful, age 23, married at 20, Bhashantek slum)

All adolescent respondents mention that marriage is a mandatory and obligatory socio-religious norm which is unavoidable and non-negotiable. As boys they are expected to get married at some stage of their lives and head the family household. There is a common perception that everybody must form a family and everyone should get married at some stage of their lives. This role of a husband, a father and potential head of family – is a role that one must fulfill as part of his duty in life. Because boys in urban slums are either forced by circumstances to earn a living and be economically independent earlier in life – most did not see any good reason to delay fulfilling their other duty, i.e. marriage.

Marriage, in a traditional South Asian/ Bangladeshi cultural context is not only a norm but it is a social institution that is used as the basis of expanding kinship, social network and resources. Kinship and families work as social safety networks, especially for low income urban poor slum dwellers that depend heavily on kinship and such networks for survival in cities. For many young people, life in slums is devoid of experiences of extended family, support and nurturing – and marriage is seen as a way to acquire these experiences along with gaining valuable social capitals. Desiring kinship and extension of social network, is cited by Mojnu (24) an orphan boy. Mojnu lived with his distant maternal uncles before his marriage (at the age of 16). He stated that his uncles also influenced his decision of getting married at a young age:

*"They (uncles) told if I got married, I would have a family, I would have in-laws and a guardian through them. As I had no one, I thought my wife and her family would give me the support I needed. . . At that time, I also thought, it would be better if I got married since my wife would be able to take care of my family, my food, washing my cloths."* (An early married male, age 24, married at 16, Bhashantek slum)

In hetero-patriarchal social arrangement of marriage, if the boy is expected to ensure financial support, the girl (wife) is expected to bring free labor to support and care for her husband and his household. Marriage is not only about love or sexual desires being fulfilled, but the economic aspect of providing in exchange of free labor at household level in terms of care services – is a transactional reality.

Respondents mentioned that girls usually have to stop working in paid labor market after marriage. However, in the slum context where most of the families were living under poverty, many of the girls

1  
2  
3 continue their jobs even after marriage to support in-law's family or husband with their permission.  
4 Faruk, an early married adolescent supported this aspect and utility of early marriage:  
5

6 *I decided to get married as we needed a support for household work. My mother cannot do any*  
7 *work, she is a diabetic patient. My sister goes to work in a garment factory. It is not possible for*  
8 *her to do all the household chores. I felt that I needed to bring in a support. As she (wife) was*  
9 *able to do household works and she could also earn. I thought, it would be better to run our*  
10 *family with her income and my income. .”(An early married boy, age 18, married at 17, worked*  
11 *in a garment factory, Shantinagar slum, he had a romantic relationship with his colleague in*  
12 *same garment factory and got married).*  
13  
14  
15

16 Unfortunately, a few months after their marriage, Faruk lost his job and at the time of interview, he was  
17 very much worried regarding inability to maintain household financial responsibilities. All of the early  
18 married males expressed that marriage brought many and overburdened responsibilities into their  
19 young lives, which they were not prepared for. The pressure to earn and be responsible for a family or  
20 household, gave rise to psychological stress to them. An early married boy expressed his feelings-  
21

22 *'At times I do not feel good since I am unable to give anything to my wife. I have no income and I*  
23 *have to depend on my father. But I am married, and when my wife asks for something, I cannot*  
24 *provide it to her. It is not always possible to ask money (from my father) for me and my wife."*  
25 *(Maruf, 21, married at 20, Bhashantek slum)*  
26

27 Moreover, it is common for young males to stop their education mid-way in school or opt for low  
28 income employment opportunities as they had no prior skills or experiences in better paying jobs , these  
29 situations limited their scope to earn more, forcing them to opt for low income, unskilled and physically  
30 laborious jobs. Furthermore, lack of awareness and poor participation in sexual and reproductive health  
31 services, early fatherhood was a common phenomenon among the early married young males in urban  
32 slums. It created an extra psychological stress as they were not able to meet the demands and proper  
33 care of children.  
34  
35

36 As our respondents stated that adjusting to new adult responsibilities like earning, marriage and  
37 parenthood, financial responsibilities of running a household and balancing new relationship dynamics  
38 in the family and society, settling down to a routine of domestic situation yet remaining entitled to  
39 young masculinity challenge their gender and sex role performance, create a stressful situation in their  
40 lives. Though culturally most of these new life situations are often fallen on the bride/young girls'  
41 shoulders as she is expected to become an adult all on a sudden – it is not that different or easy for the  
42 young men.  
43  
44  
45

### 46 **2.3 Fulfillment of sexual desire**

  
47

48 Sex is a taboo topic in Bangladeshi society, and bound by marriage normativity (even though fulfillment  
49 of sexual desire is considered as the primary basis of all marriages). In the discussion of marriage, issues  
50 of sexual and reproductive health and rights are still difficult to bring into conversations, especially with  
51 young people. Fulfillment of sexual desire is nevertheless cited as one of the reasons to influence young  
52 males' decision to get married early. During one to one interviews and some informal discussions, some  
53 respondents did admit that desire to have sex was one of the driving forces to get married so early. Sex  
54 outside marriage and before marriage is considered sinful, is socially condemned and is matter of public  
55  
56  
57

1  
2  
3 shaming (when revealed) – marriage remains the only legal and socially acceptable way of fulfilling  
4 sexual desires, which is natural for everyone. To pursue a regular sexual relationship without negative  
5 consequences, marriage is considered as a valid pathway for young men.  
6

7  
8 *“Outside of marriage, I will not always get to fulfill my sexual desires. Even if I want to have sex*  
9 *with a prostitute, I need money! But then she (partner outside marriage) may complain about*  
10 *me or file a case against me! So many people think it is better off to marry a girl instead. Then I*  
11 *can have with her anytime and no one will say anything.” (Early married male, age24, married at*  
12 *16, in IDI, Bhashantek slum)*  
13

14 Sexual satisfaction, or at least fulfilling one’s sexual urges/desires is considered to be a male  
15 entitlement. Through marriage, a young male desires to have easy access to sex with his wife without  
16 having to spend money. Regarding this issue of young male’s sexuality, sexual awareness and desires, a  
17 local school teacher tried to explain social reasons:  
18  
19

20 *“Most of the adolescent now a day, have access to the internet. Those who do not have their*  
21 *own mobile phones, their friends have it and they share phones for watching pornography. It*  
22 *may also influence sexual desire. Adolescents get involved in sexual relation out of marriage to*  
23 *meet up this desire, which is not socially accepted. Also partners are not always available (to*  
24 *monitor). They are also involved in some risks as society does not approve of sex out of marriage.*  
25 *It may be another cause of getting married earlier for the adolescents.” (Teacher, age 39, in*  
26 *teaching profession-17 years, Shantinagar slum)*  
27  
28

29  
30 Pre-marital relationships are not socially or morally accepted in the social fabric of Bangladesh, such  
31 relationships attract varying degrees of punishments from communities, families and other social/legal  
32 structures. Study findings suggested that the desire for sexual fulfillment among adolescent boys plays a  
33 vital role as a cultural factor influencing decisions pertaining to child marriage. However, many of the  
34 young male respondents reported that husbands lost attraction to wife day by day and they involved in  
35 extramarital relationships.  
36  
37  
38  
39

#### 40 **2.4 To ensure fruitful endings to romantic relationships**

41 There was a common perception across all of our respondents that the prevalence of romantic  
42 relationships between adolescent boys and girls in the slums was on the rise, or at least young people  
43 were more open about being involved in relationships. They mentioned that mobile phone affordability  
44 and accessibility had made it easier for adolescents to communicate with each other, engage in  
45 romantic relationships and bypass guardian’s surveillance. Moreover, due to the very congested nature  
46 of slums, young males and girls could easily interact with one another and neighborhood surveillance of  
47 adolescents is far lower than it is in rural areas.  
48  
49  
50

51 Findings showed that once adolescents engaged in a teen romance, there is a fear of losing ‘love’, which  
52 results in decisions about getting marry as early as possible. A few respondents decided to marry  
53 “simply out of love” and due to a fear of losing their girlfriend to someone else if they were late by  
54 waiting for adulthood.  
55  
56  
57

1  
2  
3 *“As I am a boy, one day I have to be married. I will have to form a family; I will have one or two*  
4 *kids. As I loved this girl, I didn’t want to lose her, so we got married...”*(an early married boy, age  
5 18, married at 17, worked in a garment factory, Shantinagar slum, he had a romantic  
6 relationship with his colleague in same garment factory and got married by eloping).  
7  
8

9 Young males often become emotionally insecure and frustrated in romantic relationships at this age.  
10 Under emotional pressure they assume that only marriage can provide social acceptance to an  
11 otherwise frowned-upon romantic relationship. Among four cases of elopement, all respondents made  
12 the decision of elopement as they feared succumbing to family pressure to end relationships otherwise.  
13

14 *“In our area, most of the early marriage occurred here due to love relation. Parents allow early*  
15 *marriage in a crucial situation. . . . In our area, most of the marriage occurred due to the*  
16 *relation. When the boy & girl left home and elope together for love affection and come back in*  
17 *the slum after some days, in that time parents arranged for their marriage. . . . Out of 100, 80*  
18 *early marriages occurred here for love affair and most of the formal marriages were performed*  
19 *for leaving home with the partner.”* (Participants of FGD with young males, Bhashantek slum)  
20  
21  
22

23 Unlike other cases, where young males made independent decisions (often in agreement with parents)  
24 to marry early because they had financial agency and independence, in most cases of elopement, young  
25 males did not have any earning and were dependent on their parents. The rushed decision of getting  
26 married before reaching ‘adulthood’ was based on fear of losing the loved one. Rejection of romantic  
27 relations by parental families can put tremendous pressure on young couples. For example, Rujib (19,  
28 married at 17) and Tonni (age 19, married at 17) who were college students, had two years of  
29 relationship but the girl’s family did not accept the relationship, so they decided to elope and get  
30 married. After getting married in the *Kazi* (marriage registrar) office, they stayed outside the slum for six  
31 months and returned only afterwards when both families accepted their marriage. Respondents  
32 mentioned that publicly declaring one’s romance and being seen to be in a relationship are considered  
33 to be tabooed, and as a marker of dishonor to the family. There is always a fear of a girl being led to  
34 romantic relation with a promise of marriage and that promise being unfulfilled – that fear of disgrace is  
35 real and parents keep vigilance over young people all the time. On the other hand, it is also disgraceful  
36 for a boy if he fails to marry his girlfriend. When family member and guardian do not accept this  
37 relationship, or boys and girls fall into an uncertain situation about their future around this relationship,  
38 from the fear of losing this relationship, they decide to get married.  
39  
40  
41  
42  
43

44 Peer influences play a significant role in influencing decision making processes when young males get  
45 into romantic relations. Some young males shared that they were influenced to engage in romantic  
46 relationship by listening and observing their other friends/co-workers that may be older or in a similar  
47 age group who are engaging in such relationships. In an FGD, respondents also mentioned that married  
48 adolescents could influence their unmarried adolescent peers through sharing stories of their sexual  
49 encounters, which instigates the desires and curiosity of young minds. Friends can influence young  
50 lovers to marry immediately as they offer social and moral support to the couples, even assisting them  
51 with their elopement plans.  
52  
53  
54  
55  
56  
57  
58  
59  
60



### Theme 3: Parental and societal interference and influence: marriage as a disciplinary act

According to respondents, especially by parents -young males who are dropped out of education and searching for employment opportunities or were unemployed for some time - remained at risk of engaging in practices such as drug addiction, gambling, gang involvement and violence which were prevalent in slum communities. As a result, most families lived with a constant fear that their adolescent boys might easily become involved in these risky practices. To reduce the chance of their young sons engaging in risky behaviors, some parents resorted to their son's marriage as an effective means of ensuring young males would be brought back to discipline.

Josna (age 45), mother of an early married adolescent boy in Shantinagar, mentioned that her son was eager to get married at the age of 16, right at the onset of his puberty. He was already working as a daily labor and therefore had an earning. Josna and her husband did not agree with their son's wish to be married so early in life. In response and resistance the young male stopped working regularly, started hanging out with friends, stayed away from home and started using drugs. After some time, Josna and her husband gave into their son's wish and arranged for his marriage because they feared their son was going astray and would be derailed in life. Marriage was, therefore, not only a fulfillment of their young son's desire, but also a socially acceptable method of controlling an unruly young male in a difficult environment where rule of law was absent.

In Bangladeshi culture, parents have control and ownership over children's lives. Important life decisions are made by parents, or at least in agreement and consent with them particularly marriage decision. When searching for a bride for the boy/young man, parents or guardians mostly consider potential bride's physical appearance, politeness, bride's parent's social and economic status. Usually, love affair or choosing own brides by sons are not socially well accepted in the Bangladeshi context. When any son does it, it is a matter of shame and dishonor for the parents. Even if any son makes his own choice in romance and marriage, they inform parents and parents usually arrange their marriage. If parents or guardians do not agree with their son's choice and decision many of the young couples might choose to marry without parental consent. But in general, everyone wishes to marry with family consent and support.

*'... if our parents want, then we have to marry. We cannot do anything else at that time. But we are not some guys who want to marry without doing anything. We have to wait for our family order, we cannot break the order'* (FGD interview with adolescent boys and young males, Bhashantek slum).

Marriage often is used as a disciplinary act to reign in an otherwise unruly son and help his guide back to a disciplined homely life:

*'Suppose someone at 15 earns a lot, like 1000 BDT a day by driving. Now his parents can marry him off. Parents think that the boy has his own income and he may involve in bad practice such as drug use, buy sex . . .they think of getting him married...it will pull him to his wife and not towards bad things. And if there is a child – he will not go towards drugs and alcohol, because when he sees his child's potential future, he is discouraged'* (an unmarried young male in FGD, age 22, Shantinagar slum).

1  
2  
3 If early marriage can be an outcome of young love – it is also true that early marriages are sometimes  
4 organized by parents who want to save family honor from being tarnished by their adolescent children's  
5 love/romantic relationships. Young respondents expressed that no matter what might be the nature of a  
6 romantic relation between a young boy and a girl – in slum societies, it is always seen with suspicion of  
7 immorality and of sexual nature. The collective suspicion and condemnation of any kind of relation  
8 between a young boy and girl can put a seal of disapproval and shame on family's name. Parents not  
9 only fear children engaging in premarital sexual relations, but also untimely elopement of young lovers –  
10 both of which are matter of disgrace.  
11  
12

13  
14 Sometimes social scrutiny and pressure can cause parents to arrange for their children's untimely and  
15 early marriages, for example, Maruf in Bhashantek (age 21, married at 20) had friendship with a girl,  
16 now his wife(age17, married at 16) near to their house. Both of them were in class nine and their  
17 relation at that point was nothing more than a likeable friendship. But their neighbors accused them of  
18 having premarital sex and complained to his parents about his conduct based on their suspicion. This  
19 brought tremendous pressure on the families, and on the adolescents. To save families and the young  
20 people from social shame and condemnation, his family arranged his marriage with her even though  
21 they both were below their legal age of marriage.  
22  
23

24 Thus, the community plays an important role in early marriage, in both rural as well as urban slum  
25 locations. In the tightly spaced and squeezed living arrangements of slums, it is impossible to ignore or  
26 avoid neighbors, their opinions and influences, particularly in those sections that are tightly bounded.  
27 Slums are also socially organized through common norms, influences of religious bodies and social  
28 leaders. Sometimes, local leaders and society can interfere, support and even organize early marriages if  
29 they deem a situation to be crucial to uphold social morality. Local leaders and heads accept early  
30 marriage to 'save family honor' in cases where adolescents engage in romantic relationships with each  
31 other.  
32  
33  
34

#### 35 36 **Section 4: Discussion**

37 Our study findings show that gendered social norms, patriarchal and masculine construction shape the  
38 decision and pathway into marriage of young males. These decision making processes might be initiated  
39 by personal choices or parental wishes or under social pressures – but at the end of the day these  
40 factors intersect with each other and culminates into an early marriage. The pathways to early marriage  
41 for young males in urban slums are complex. Findings show that the decision of marriage is not based on  
42 appropriateness or legal age for marriage rather based on their capacity to earn, to provide financial  
43 responsibilities to family, willingness to form a family and expand social network, enjoy sexual life, to  
44 bring additional labor in form of a wife to support household work. It is also perceived that marriage is a  
45 medium to control sexuality, body and mind including bad habits like addiction, extramarital sexual  
46 relation. Thus parents and society interfere to arrange marriage to protect family and societal honor if it  
47 finds a young male to be at risk of being morally derailed. Our study results also support other research  
48 findings regarding the key drivers of child marriage practice among young males and young males  
49 conducted in the low and middle income countries in South Asia and Africa[28]. What we see in this  
50 research discussion is how gender, adulthood and marriage is lived through the social constructions of  
51 masculinity, gender stereotype roles and patriarchal ideology. Each of these shapes the attitude towards  
52  
53  
54  
55  
56  
57

1  
2  
3 marriage and decision of child marriage among young males in these particular settings. Early marriage  
4 here is understood under the broader framework of adolescent sexual and reproductive health and  
5 rights (ASRHR). Hopefully findings from this research will help us to incorporate issues of gender and  
6 adulthood along with masculinity in ASRHR and child marriage prevention framework to address the  
7 problems for a sustainable solution.  
8  
9

10 The decision of marriage among the married respondents was influenced by dominant masculine and  
11 gender role ideologies. In patriarchal domain, males are the main breadwinner for family and they  
12 mainly take the financial responsibilities of family. In the context of the patriarchal society of  
13 Bangladesh, males and husbands are considered as the breadwinner for family and it is essential to  
14 establish dominance in his family and society[29]. Perceptions of masculinity in Bangladesh are  
15 dominated by concepts of strength, fear, honor, power, sexuality – and marriage plays a central role in  
16 fulfilling all these roles for men as it indicates health, power and financial capacity[18]. Thus, it is seen in  
17 this research that when a young male has income, it automatically elevates him to the stage of  
18 adulthood. This strong sense of an emerging adult identity pushes young males to think that they are  
19 now capable of getting married as they are assuming the role of a breadwinner. The whole process of  
20 negotiating agency for personal matters (like romance, marriage, sex) which are otherwise almost non-  
21 negotiable at a '*na-balak*' stage with no monetary power, now gains power to bargain with social norms  
22 and expectations (of staying asexual or childlike till marriages are arranged by family and elders).  
23 Compared to middle class and economically privileged children from the same society, where children  
24 gain social perceptions of adulthood much later in life as they live under the financial shelter and control  
25 of parental households – slum children, especially the young males gain adulthood and subsequent  
26 agency as a default outcome of lack of opportunities to stay children for as long as possible, as per  
27 Bangladeshi norms[30-32].  
28  
29  
30  
31  
32  
33

34 Other studies showed that peers are the one of the most influencing group for adolescents in working  
35 place, schools or neighborhood[33, 34]. Respondents in the study showed a clear trend in thinking of  
36 peer support as a strong backup system in making decisions about marriages. Evidence in Bangladesh in  
37 urban slum showed that peer influences, parental will and care, social environment and adolescent's  
38 personal choice also play a role in how adolescents will continue their lives in slum environment[35]. Our  
39 study showed that peers had a significant influence to think about marriage as marriage gives them an  
40 adult identity which gradually places them as a significant and powerful male member of the family.  
41 Young males also get influenced by observing other married young males of similar age and contextual  
42 background. In the workplace, there are examples of many other peers who already are married at a  
43 relatively early age. Interaction with them, discussion about their married life also may have influence  
44 on adolescent young males into desire to get married.  
45  
46  
47

48 According to study respondent, there is an increasing trend of love relationship among adolescent and  
49 young generation is prominent than before. Young males who are in romantic relation, expressed that  
50 losing their girlfriend as wife is disgraceful for them, counted it as a defeat of being as a man. So, they  
51 marry by eloping and out of guardians consent as they want to prove their power as a man. This  
52 masculine attitude also accelerates child marriage among young males in the study context like urban  
53 slum.  
54  
55  
56  
57

1  
2  
3 Our findings revealed that access to movies, pornography influence and shape the need to be sexually  
4 active and in a relationship. Other studies also support this findings that watching pornography/adult  
5 sexual content can negatively influence young males, which motivates them to get involved in  
6 premarital sexual relationships and shapes their ideas of sex, sexuality and relationships[36, 37].  
7 Respondents agreed that marriage guarantees regular sex and a sexual partner. With marriage, sexual  
8 desire can be fulfilled without any additional costs or hassles.  
9

10  
11 Findings reveal that, parents are always in fear of their adolescent and young male child getting involved  
12 in gang violence, drug addiction or other anti-social activities. There are also evidence that norms,  
13 attitude and perceptions about heterogeneous masculinity often instigates adolescent young males to  
14 engage in unsafe harmful practices such as practicing violence against others, risky sexual practice,  
15 involvement in gangs, and substance abuse[38]. In the economically, socially and politically marginalized  
16 slum setting, where adolescents lack parental guidance and are surrounded by violence, exploitation  
17 and abuse, these vulnerabilities of adolescence can be far greater and more damaging[39].  
18 Respondents informed that crimes, sexual and physical violence, drug addiction in urban slum area are  
19 very common. Earning capacity at a relatively early age in life not only grants some privileges of  
20 adulthood in terms of autonomy in spending money, but it also gives resistance to otherwise  
21 omnipresent parental surveillance. This capacity to earn and spend money can easily draw young males  
22 to 'bad habits and influences'. Other studies also showed that same evidences[40]. So, parents feel  
23 insecure about their sons' lifestyle, and their lack of control. Therefore, they try to engage their sons  
24 into work and often in marriages. It also helps parents to secure their financial needs for family. Parents  
25 along with (and often under pressure from) other people in society perceive 'marriage' of a young male  
26 may be a strategy to protect and to keep control from any uneven practice and a disciplinary act. They  
27 perceive that 'marriage' creates some responsibilities and accountabilities to wife and family.  
28

29  
30 After parents, it is immediate and extended families, as well as kinship that play significant roles in  
31 shaping children's lives, when it comes to marriage. Reputation, acceptability, social position and  
32 respect – aspects of lives that are considered as prized possessions, especially in newly urbanized lives in  
33 slums, where survival can depend on social networks – neighbor's, local people and leaders' opinion on  
34 relationships and marriages matter. Often time of marriage is decided by these external forces even if  
35 the adolescent boy or his parents might want to decide otherwise.  
36

37  
38 Early marriage takes place for both girls and boys irrespective of what gender norms and values one  
39 might harbor. Adolescent boys negotiate a complex web of gender privilege, emerging adulthood,  
40 agency and social network and influences in making important decisions of life, like marriage. The  
41 matter of early marriage, for adolescent urban slum young males, is rarely a case of vulnerability and  
42 victimhood, like majority of their female counterpart. Agency, consent and desire to start family, sexual  
43 partnership, to run a household and provide support to parental households with additional (free) labor  
44 – are major reasons that influence adolescent boys' decision to marry earlier than legally sanctioned age  
45 by the state.  
46

47  
48 This is a first time attempt to explore the perspectives, underlying reasons that influence the decision of  
49 early marriage of young males in urban slum context of Bangladesh. However, data were collected only  
50 from two slums which may not portray full scenario and realities of other slums in Bangladesh. Due to  
51  
52

1  
2  
3 the sensitivity of the topics, such as, early marriage, sexuality, drug addiction, violence, power politics in  
4 slum community, many of the respondents might be conservative to express their views and practices or  
5 might change some information. However, we start the discussion regarding the early marriage decision  
6 of these ignored and vulnerable groups. Therefore, it is important and expects more explorations and  
7 understandings in the discourse of preventing early marriage.  
8  
9

## 10 11 12 **Conclusion** 13

14 Our study reveals that the issue of early marriage, in low income urban slum contexts, has many  
15 different entry points for young males. Researches show that increasingly both young males and females  
16 are getting married early with their own consent, and in this research, it is evident that young males  
17 have greater voice and agency to give consent to marriage even if they are not technically (legally)  
18 adults.  
19

20  
21 From the findings of this research, we get a glimpse of how in low income socially vulnerable context of  
22 urban slums, adolescent young males negotiate adulthood processes in a complex but gender unequal  
23 spectrum of power and agency, and when it comes to marriage, these gendered power, privileges and  
24 agency pave pathways in asserting decisions that are otherwise not even legally granted to them.  
25

26  
27 In slum contexts, where space and livelihood is earned with a premium, and newly urbanized families  
28 struggle to find a footing in an already crowded and competitive city like Dhaka or Chittagong, there is a  
29 constant conflict, pull and push of norms, traditions and modernity – and young people are at the center  
30 of these shifting norms and ideas. The new realities of urban spaces bring new realities and definitions  
31 of adulthood, and we clearly see that adolescent young males find new agency with new economic  
32 prowess. In the context of the urban slums, the perceived phenomena of adulthood, decision making  
33 capability, aspiration towards marriage, family formation and sexuality influence the marriage decision  
34 making process especially child marriage among the young males in the context of urban slums of  
35 Bangladesh.  
36  
37

38  
39 When an adolescent boy is considered as adult mainly based on his income ability and marital status, he  
40 is deprived of opportunities for his growth and development. Moreover, child marriage cut short the  
41 adolescence of young males and compromises their fundamental human rights. It affects their  
42 education, earning power and economic prospects, expectation, freedom, physical and psychological  
43 health and social life, however, nominal attention is given to the vulnerabilities of young males[41, 42].  
44

45  
46 Adolescent and young males' child marriage has many risk profiles that not only negatively affect their  
47 own situation but also have impacts on their partner's and family life. As long as child marriage  
48 prevention program only focuses girls with nominal focus on young males, it will be difficult to address  
49 child marriage holistically. A clear understanding about male's understandings, behavior and practice  
50 regarding child marriage are crucial to design interventions and programs to support this group of young  
51 men to stop child marriage.  
52  
53  
54  
55  
56  
57  
58  
59  
60

### Author affiliations

<sup>1</sup>BRAC James P Grant School of Public Health, BRAC University, Dhaka, Bangladesh

<sup>2</sup> Women's Studies and Feminist Research, University of Western Ontario, Canada

Correspondence: Subas Biswas; subasbiswas@gmail.com

**Acknowledgements** The authors would like to thank the study participants and BRAC field staffs for their assistance during field work. The authors also thank to the research team and data collectors.

**Contributors** SFR and SB conceptualized and designed this study. SB analysed the data; SB and SK drafted, revised and finalized the manuscript. SFR, Principal Investigator of this study made final review and feedback on and supervised the manuscript. All authors read and approved the final manuscript.

**Funding** This work was supported by the research grant from International Development Research Centre, Ottawa, Canada; Grant number 108011-001.

**Competing interests** None declared

**Patient consent for publication** Not required

**Ethics approval** The study received ethical approval from the Ethical Review Committee of BRAC James P Grant School of Public Health, BRAC University, Dhaka, Bangladesh (Ethics Reference No: 91, 18 October 2016).

**Data availability statement** Data are available upon reasonable request

### References

1. Parsons J, Edmeades J, Kes A, Petroni S, Sexton M, Wodon Q. Economic impacts of child marriage: A review of the literature. *The Review of Faith & International Affairs* 2015; 13(3):12-22. Available: <https://doi.org/10.1080/15570274.2015.1075757>.
2. Wodon Q, Male C, Nayihouba A, Onagoruwa A, Savadogo A, Yedan A, et al. Economic impacts of child marriage: global synthesis report. Washington, DC: The World Bank and The International Center for Research on Women (ICRW) 2017. Available: <http://documents.worldbank.org/curated/en/530891498511398503/pdf/116829-WP-P151842-PUBLIC-EICM-Global-Conference-Edition-June-27.pdf>
3. Patton GC, Sawyer SM, Santelli JS, Ross DA, Afifi R, Allen NB, et al. Our future: a Lancet commission on adolescent health and wellbeing. *The Lancet* [Internet] 2016; 387(10036):2423-78. doi: [https://doi.org/10.1016/S0140-6736\(16\)00579-1](https://doi.org/10.1016/S0140-6736(16)00579-1)
4. Svanemyr, J., Chandra-Mouli, V., Raj, A. et al. Research priorities on ending child marriage and supporting married girls. *Reprod Health* 2015; 12:80. <https://doi.org/10.1186/s12978-015-0060-5>

- 1
  - 2
  - 3
  - 4
  - 5
  - 6
  - 7
  - 8
  - 9
  - 10
  - 11
  - 12
  - 13
  - 14
  - 15
  - 16
  - 17
  - 18
  - 19
  - 20
  - 21
  - 22
  - 23
  - 24
  - 25
  - 26
  - 27
  - 28
  - 29
  - 30
  - 31
  - 32
  - 33
  - 34
  - 35
  - 36
  - 37
  - 38
  - 39
  - 40
  - 41
  - 42
  - 43
  - 44
  - 45
  - 46
  - 47
  - 48
  - 49
  - 50
  - 51
  - 52
  - 53
  - 54
  - 55
  - 56
  - 57
  - 58
  - 59
  - 60
5. Lowe E, Kharoufeh N, McKinley B, McDonald E, Alphonse P, Boustani R, et al. The Development of Global Responses to Child, Early and Forced Marriages. HAQ Centre for Child Rights (Haqrcr) and Macquarie University 2017. Available: <https://EconPapers.repec.org/RePEc:ess:wpaper:id:12245>
6. Marcus R, Harper C, Brodbeck S, Page E. Social norms, gender norms and adolescent girls: A brief guide. London: Overseas Development Institute 2015. Available: <https://www.odi.org/sites/odi.org.uk/files/odi-assets/publications...files/9818.pdf>
7. Hodgkinson K, Koster W, Miedema E. Understanding and addressing child marriage: A scoping study of available academic and programmatic literature for the HER CHOICE Alliance. Amsterdam Institute for Social Science Research (AISSR) 2016. Available: <http://hdl.handle.net/11245.1/61e74e50-c05c-40c7-831c-ac634ae4b028>
8. UNICEF. Early marriage: Child spouses. *Innocenti Digest* No. 7, March 2001. Florence, Italy: Unicef, Innocenti Research Centre 2001.
9. Mukherjee A, Sekher T. Do Only Girls Suffer? We Too! *Economic & Political Weekly* 2017;52(1):75.
10. UNICEF. Child marriage: Child marriage is a violation of human rights, but is all too common. 2018 Available: <https://data.unicef.org/topic/child-protection/child-marriage/> (Accessed 4 December 2018 )
11. Greene ME, Perlson S, Taylor A, Lauro G. Engaging men and boys to address the practice of child marriage. Washington, DC: Greene Works, 2015.
12. Karim N, Greene M, Picard M. The cultural context of child marriage in Nepal and Bangladesh: Findings from CARE's Tipping Point project community participatory analysis: Research report. Geneva: CARE, 2016.
13. Misunas C, Gastón CM, Cappa C. Child marriage among boys in high-prevalence countries: An analysis of sexual and reproductive health outcomes. *BMC International Health and Human Rights* 2019;19(1):25. Available: <https://bmcinthealthhumrights.biomedcentral.com/track/pdf/10.1186/s12914-019-0212-8>
14. Gastón CM, Misunas C, Cappa C. Child marriage among boys: a global overview of available data. *Vulnerable Children and Youth Studies* 2019:1-10. <https://doi.org/10.1080/17450128.2019.1566584>
15. Verma R, Sinha T, Khanna T. Asia child marriage initiative: Summary of research in Bangladesh, India and Nepal. International Center for Research on Women (ICRW), Plan Asia Regional Office, 2013. Available: <https://www.icrw.org/wp-content/uploads/2016/10/PLAN-ASIA-Child-Marriage-3-Country-Study.pdf>.
16. Malhotra A, Warner A, McGonagle A, Lee-Rife S. Solutions to end child marriage. Washington, DC: International Center for Research on Women, 2011.
17. National Institute of Population Research and Training (NIPORT), ICF International (USA) and Mitra and Associates. Bangladesh Demographic and Health Survey 2011. Dhaka, Bangladesh, and Rockville, Maryland, USA, 2013. Available at <https://dhsprogram.com/pubs/pdf/fr265/fr265.pdf>
18. Khan TZ. Study: 80% slum girls victims of child marriage Dhaka. The Dhaka Tribune [May 22, 2014]. Available: <https://www.dhakatribune.com/uncategorized/2014/05/22/study-80-slum-girls-victims-of-child-marriage> (Accessed 13 March 2019)
19. Stavropoulou M, Marcus R, Rezel E, Gupta-Archer N, Noland C. Adolescent girls' capabilities in Bangladesh: The state of the evidence. London: Gender and Adolescence: Global Evidence (GAGE);

2017. Available from: [https://www.gage.odi.org/sites/default/files/2018-02/Bangladesh%20Capabilities%20Report\\_0.pdf](https://www.gage.odi.org/sites/default/files/2018-02/Bangladesh%20Capabilities%20Report_0.pdf).
20. Rashid SF. Human rights and reproductive health: Political realities and pragmatic choices for married adolescent women living in urban slums, Bangladesh. *BMC international health and human rights* 2011; 11(3):[S3 p.]. Available: <http://www.biomedcentral.com/1472-698X/11/S3/S3>
21. Rashid, S F, Marriage Practices in an Urban Slum: Vulnerability, Challenges to Traditional Arrangements and Resistance by Adolescent Women in Dhaka, Bangladesh. Asia Research Institute Working Paper No. 72; 2006. Available: <http://dx.doi.org/10.2139/ssrn.1317159>
22. UNICEF. Early marriage a harmful traditional practice: A statistical exploration. New York: UNICEF; 2005. Available from: [http://www.unicef.org/publications/files/Early\\_Marriage\\_12.lo.pdf](http://www.unicef.org/publications/files/Early_Marriage_12.lo.pdf)
23. Government of Bangladesh (GoB). Child Marriage Restraint Act, 2017 (Act No. 6 of 2017). 2017.
24. Hossain S. Legal Remedies for Forced Marriage in Bangladesh. In: Hossain S, Welchman L, editors. Remedies for Forced Marriage: A Handbook for Lawyers. INTERIGHTS - The International Centre for the Legal Protection of Human Rights, 2014.
25. Center for Reproductive Rights. Ending Impunity for Child Marriage in Bangladesh: Normative and implementation gaps. Policy brief, 2018. New York.
26. Ferdous D, Saha P, Yeasmin F. Preventing child, early and forced marriage in Bangladesh: understanding socio-economic drivers and legislative gaps: Final report. Oxfam, 2019. Available: <https://oxfamilibrary.openrepository.com/handle/10546/620881>
27. Baden S, Green C, Goetz AM, Guhathakurta M. Background report on gender issues in Bangladesh: University of Sussex: Institute of Development Studies, 1994.
28. Koster W, Miedema E, Hodgkinson K, Pouw N, Meyer P. Her Choice Baseline Study Synthesis Report. Amsterdam: The Amsterdam Institute for Social Science Research, 2017.
29. Rao N. Breadwinners and homemakers: Migration and changing conjugal expectations in rural Bangladesh. *Journal of Development Studies* 2012; 48(1):26-40. Available: <http://dx.doi.org/10.1080/00220388.2011.629648>.
30. Blanchet T. Lost innocence, stolen childhoods. Dhaka: University Press Ltd., 1996.
31. Karim S. Living sexualities: Non-heterosexual women and sexuality in urban middle class Bangladesh. In: Helie A, Hoodfar H, eds. Policing sexuality and Muslim women's resistance. London: Zed Books, 2012: 269-93.
32. Karim, S. Sexualities: Practices: Bangladesh. In: Joseph S. ed Encyclopedia of women & Islamic cultures. Brill Online Reference Works, 2012. Available: [http://dx.doi.org/10.1163/1872-5309\\_ewic\\_EWICCOM\\_001441](http://dx.doi.org/10.1163/1872-5309_ewic_EWICCOM_001441)
33. Cairns RB, Leung MC, Buchanan L, Cairns BD. Friendships and social networks in childhood and adolescence: Fluidity, reliability, and interrelations. *Child development* 1995;66(5):1330-45.
34. Hasam MA, Mushahid M. Drug addiction in urban life of Bangladesh: A sociological study for exploring the causes. *Asia Pacific Journal of Multidisciplinary Research* 2017; 5(2). Available: [www.apjmr.com/wp-content/uploads/2017/04/APJMR-2017.5.2.01.pdf](http://www.apjmr.com/wp-content/uploads/2017/04/APJMR-2017.5.2.01.pdf).
35. Bangladesh Bureau of Statistics (BBS). Child Labor Survey 2013. Dhaka: Bangladesh Bureau of Statistics, Ministry of planning, 2015.



- 1  
2  
3 36. Asekun-Olarinmoye OS, Asekun-Olarinmoye EO, Adebimpe WO, Omisore AG. Effect of mass media  
4 and internet on sexual behavior of undergraduates in Osogbo metropolis, southwestern Nigeria.  
5 *Adolescent health, medicine and therapeutics* 2014; 5:15. doi: [10.2147/AHMT.S54339](https://doi.org/10.2147/AHMT.S54339)  
6  
7 37. Owens EW, Behun RJ, Manning JC, Reid RC. The impact of Internet pornography on adolescents: A  
8 review of the research. *Sexual Addiction & Compulsivity* 2012;19(1-2):99-122.  
9 <https://doi.org/10.1080/10720162.2012.660431>  
10  
11 38. Dickson-Gomez J, Quinn K, Broaddus M, Pacella M. Gang masculinity and high-risk sexual  
12 behaviours. *Culture, health & sexuality* 2017; 19(2):165-78. doi: [10.1080/13691058.2016.1213422](https://doi.org/10.1080/13691058.2016.1213422)  
13  
14 39. Unicef. The State of the World's Children-Special Edition: Celebrating 20 Years on the Convention on  
15 the Rights of the Child: Executive Summary. Unicef, 2009.  
16  
17 40. Islam A. Crime and Delinquency among Slum Children of Dhaka City: A Sociological Study. Lambert  
18 Academic Publishing, 2015.  
19  
20 41. Lancet T. Adolescent health: Boys matter too. *The Lancet* 2015;386(10010):2227.  
21 doi:[https://doi.org/10.1016/S0140-6736\(15\)01160-5](https://doi.org/10.1016/S0140-6736(15)01160-5)  
22  
23 42. Peate I. Male adolescent health and wellbeing matters too. *British Journal of School Nursing* 2016;  
24 11(1):33-5. Available: <https://doi.org/10.12968/bjsn.2016.11.1.33>  
25  
26  
27  
28  
29  
30  
31  
32  
33  
34  
35  
36  
37  
38  
39  
40  
41  
42  
43  
44  
45  
46  
47  
48  
49  
50  
51  
52  
53  
54  
55  
56  
57  
58  
59  
60

This consolidated criteria for reporting qualitative studies (COREQ) checklist for this article are described as follows-

| No Item                                        | Description                                                                                                                                                                                                                                                                                                                                                                                         |
|------------------------------------------------|-----------------------------------------------------------------------------------------------------------------------------------------------------------------------------------------------------------------------------------------------------------------------------------------------------------------------------------------------------------------------------------------------------|
| <b>Domain 1: Research team and reflexivity</b> |                                                                                                                                                                                                                                                                                                                                                                                                     |
| <b>Personal Characteristics</b>                |                                                                                                                                                                                                                                                                                                                                                                                                     |
| 1. Interviewer/facilitator                     | SubasBiswas with other researchers conducted the interviews and focus group discussion sessions.<br>Sabina F Rashid trained researchers how to conduct interviews and focus group                                                                                                                                                                                                                   |
| 2. Credentials                                 | All of the researchers had minimum Master's degree in Anthropology, Public Health or Social Science<br>Whereas Sabina F Rasid and ShuchKarim have PhD degree.                                                                                                                                                                                                                                       |
| 3. Occupation                                  | All of the researchers were full time engaged in this research; however, Sabina F Rashid and ShuchiKarim were also involved in teaching in universities.                                                                                                                                                                                                                                            |
| 4. Gender                                      | There were a group of researchers and both male and females researchers were in this group                                                                                                                                                                                                                                                                                                          |
| 5. Experience and training                     | All of the researchers had prior experience in conducting research. Moreover, all of the researchers were gone through several training and workshop sessions for present study                                                                                                                                                                                                                     |
| <b>Relationship with participants</b>          |                                                                                                                                                                                                                                                                                                                                                                                                     |
| 6. Relationship established                    | Prior to data collection a good rapport was established with each respondents and also community people. The researchers spent several weeks in the field and collected data.                                                                                                                                                                                                                       |
| 7. Participant knowledge of the interviewer    | Participants were informed about the researcher's identity, objectives and involvement in this study.                                                                                                                                                                                                                                                                                               |
| 8. Interviewer characteristics                 | Researcher informed participants about their designation, affiliation of the organization, aims and objectives of the study and what the involvements of the researchers in this study were. Participants were also informed how researchers would use this data and what would be the role of the researchers in presenting information to other audiences.                                        |
| <b>Domain 2: study design</b>                  |                                                                                                                                                                                                                                                                                                                                                                                                     |
| <b>Theoretical framework</b>                   |                                                                                                                                                                                                                                                                                                                                                                                                     |
| 9. Methodological orientation and Theory       | Content and thematic analysis were done to underpin the study                                                                                                                                                                                                                                                                                                                                       |
| <b>Participant selection</b>                   |                                                                                                                                                                                                                                                                                                                                                                                                     |
| 10. Sampling                                   | Purposive and snowballing methods were used to select participants                                                                                                                                                                                                                                                                                                                                  |
| 11. Method of approach                         | Participants were approached face-to-face                                                                                                                                                                                                                                                                                                                                                           |
| 12. Sample size                                | The broader research project collected both quantitative and qualitative data using questionnaire survey with 2136 adolescent girls and young women aged 13-24 years and 96 In-depth interview (IDI), and 12 focus group discussion (FGD) were conducted with married and unmarried adolescents and young girls and boys aged 15-24 years, their parents and 33 key-informant interviews (KII) with |

|                                        |                                                                                                                                                                                                                                                                                                                                                                                                                                                                                                                                                                        |
|----------------------------------------|------------------------------------------------------------------------------------------------------------------------------------------------------------------------------------------------------------------------------------------------------------------------------------------------------------------------------------------------------------------------------------------------------------------------------------------------------------------------------------------------------------------------------------------------------------------------|
|                                        | <p>community leaders, teachers, marriage registrars and program people.</p> <p>However, this present article used 22 In-depth interviews (IDIs) and 3 focus group discussions (FGD) with married and unmarried adolescent and young males aged 15-24 years; 13 IDIs and 4 FGDs with parents and 11 key-informant interviews (KIIs) with community leaders.</p>                                                                                                                                                                                                         |
| 13. Non-participation                  | About 10-12 young male respondents refused to participate in this study as they were not interested or they had no time enough to spend time as most of the interviews were conducted at the day tome and these potential participants were engaged in work during day time.                                                                                                                                                                                                                                                                                           |
| <b>Setting</b>                         |                                                                                                                                                                                                                                                                                                                                                                                                                                                                                                                                                                        |
| 14. Setting of data collection         | All of the interviews were conducted at participants own setting, whether it was in their home or near to their home where they felt comfort to talk.                                                                                                                                                                                                                                                                                                                                                                                                                  |
| 15. Presence of non-participants       | <p>When interviews were conducted in participant's own home, there were family members near to the interview sessions in some cases. But they were not present full time of the interview sessions.</p> <p>One researcher conduct one interview and audio recorder was used to record all of the conversations with the informed consent of the participants.</p> <p>Two researchers were involved to conduct focus group discussions session. Here researchers also used audio recorder to record all of the conversations with informed consent of participants.</p> |
| 16. Description of sample              | The sample characteristics include age, marital status, age at marriage, income and job status                                                                                                                                                                                                                                                                                                                                                                                                                                                                         |
| <b>Data collection</b>                 |                                                                                                                                                                                                                                                                                                                                                                                                                                                                                                                                                                        |
| 17. Interview guide                    | Data were collected using pretested guidelines phase by phase in two study sites                                                                                                                                                                                                                                                                                                                                                                                                                                                                                       |
| 18. Repeat interviews                  | No repeat interviews were conducted                                                                                                                                                                                                                                                                                                                                                                                                                                                                                                                                    |
| 19. Audio/visual recording             | The research use audio recording with informed consent of the participants to collect the data                                                                                                                                                                                                                                                                                                                                                                                                                                                                         |
| 20. Field notes                        | Field note were taken during and after the In-depth Interview (IDI) and Focus Group discussion (FGD) and also key-Informant Interviews(KII)                                                                                                                                                                                                                                                                                                                                                                                                                            |
| 21. Duration                           | For IDIs, the duration was about 90-100 minutes,<br>For FGDs, the duration was about 120-150 minutes<br>For KIIs, the duration was about 60-80 minutes                                                                                                                                                                                                                                                                                                                                                                                                                 |
| 22. Data saturation                    | Data saturation was not discussed                                                                                                                                                                                                                                                                                                                                                                                                                                                                                                                                      |
| 23. Transcripts returned               | Transcripts were not returned to participants for comment or correction                                                                                                                                                                                                                                                                                                                                                                                                                                                                                                |
| <b>Domain 3: analysis and findings</b> |                                                                                                                                                                                                                                                                                                                                                                                                                                                                                                                                                                        |
| <b>Data analysis</b>                   |                                                                                                                                                                                                                                                                                                                                                                                                                                                                                                                                                                        |
| 24. Number of data coders              | Eight data coders coded the data                                                                                                                                                                                                                                                                                                                                                                                                                                                                                                                                       |

|                                    |                                                                                                                                                         |
|------------------------------------|---------------------------------------------------------------------------------------------------------------------------------------------------------|
| 25. Description of the coding tree | The authors did not provide a description of the coding tree                                                                                            |
| 26. Derivation of themes           | Themes were derived from the data                                                                                                                       |
| 27. Software                       | Atlasti (version 8) software was used to manage the data                                                                                                |
| 28. Participant checking           | Participants did not check the findings                                                                                                                 |
| <b>Reporting</b>                   |                                                                                                                                                         |
| 29. Quotations presented           | Participant quotations are presented to illustrate the findings. Basic characteristics of these participants were also presented with these quotations. |
| 30. Data and findings consistent   | Consistency between the data and findings are discussed                                                                                                 |
| 31. Clarity of the major themes    | Major themes are clearly presented in the findings                                                                                                      |
| 32. Clarity of minor themes        | A description of diverse cases and discussion of minor themes are also presented                                                                        |

# BMJ Open

**Should we care: A qualitative exploration of the factors that influence the decision of early marriage among young males in urban slums of Bangladesh.**

|                                 |                                                                                                                                                                                                                                  |
|---------------------------------|----------------------------------------------------------------------------------------------------------------------------------------------------------------------------------------------------------------------------------|
| Journal:                        | <i>BMJ Open</i>                                                                                                                                                                                                                  |
| Manuscript ID                   | bmjopen-2020-039195.R2                                                                                                                                                                                                           |
| Article Type:                   | Original research                                                                                                                                                                                                                |
| Date Submitted by the Author:   | 24-Aug-2020                                                                                                                                                                                                                      |
| Complete List of Authors:       | Biswas, Subas; BRAC University James P Grant School of Public Health, CGSRHR<br>Karim, Shuchi; BRAC University James P Grant School of Public Health, Rashid, Sabina Faiz; BRAC University James P Grant School of Public Health |
| <b>Primary Subject Heading</b>: | Public health                                                                                                                                                                                                                    |
| Secondary Subject Heading:      | Sexual health, Public health                                                                                                                                                                                                     |
| Keywords:                       | Health policy < HEALTH SERVICES ADMINISTRATION & MANAGEMENT, QUALITATIVE RESEARCH, Risk management < HEALTH SERVICES ADMINISTRATION & MANAGEMENT, Change management < HEALTH SERVICES ADMINISTRATION & MANAGEMENT                |
|                                 |                                                                                                                                                                                                                                  |

SCHOLARONE™  
Manuscripts



I, the Submitting Author has the right to grant and does grant on behalf of all authors of the Work (as defined in the below author licence), an exclusive licence and/or a non-exclusive licence for contributions from authors who are: i) UK Crown employees; ii) where BMJ has agreed a CC-BY licence shall apply, and/or iii) in accordance with the terms applicable for US Federal Government officers or employees acting as part of their official duties; on a worldwide, perpetual, irrevocable, royalty-free basis to BMJ Publishing Group Ltd ("BMJ") its licensees and where the relevant Journal is co-owned by BMJ to the co-owners of the Journal, to publish the Work in this journal and any other BMJ products and to exploit all rights, as set out in our [licence](#).

The Submitting Author accepts and understands that any supply made under these terms is made by BMJ to the Submitting Author unless you are acting as an employee on behalf of your employer or a postgraduate student of an affiliated institution which is paying any applicable article publishing charge ("APC") for Open Access articles. Where the Submitting Author wishes to make the Work available on an Open Access basis (and intends to pay the relevant APC), the terms of reuse of such Open Access shall be governed by a Creative Commons licence – details of these licences and which [Creative Commons](#) licence will apply to this Work are set out in our licence referred to above.

Other than as permitted in any relevant BMJ Author's Self Archiving Policies, I confirm this Work has not been accepted for publication elsewhere, is not being considered for publication elsewhere and does not duplicate material already published. I confirm all authors consent to publication of this Work and authorise the granting of this licence.

## Title page

**Title of the paper:** Should we care: A qualitative exploration of the factors that influence the decision of early marriage among young males in urban slums of Bangladesh.

**Authors:** Subas Biswas, Shuchi Karim, Sabina Faiz Rashid

**Corresponding author:** Shuchi Karim, Assistant Professor, Women's Studies and Feminist Research, University of Western Ontario, Canada. Contact detail: shuchikarim2006@gmail.com; skarim63@uwo.ca; Phone # +1 4379851973; ORCID identifier is 0000-0002-2770-8784, author's full ORCID ID and the link is <https://orcid.org/0000-0002-2770-8784>

**Details of Co-authors:**

Subas Biswas, Senior Research Fellow, BRAC James P Grant School of Public Health, BRAC University, Dhaka, Bangladesh. E-mail: subasbiswas@gmail.com

Sabina Faiz Rashid, Dean and Professor, BRAC James P Grant School of Public Health, BRAC University, Dhaka, Bangladesh. E-mail: sabina@bracu.ac.bd

**Key words:** Early marriage, Young males, Urban slums, Bangladesh

**Word count:** 9214

## Main text

### Should we care: A qualitative exploration of the factors that influence the decision of early marriage among young males in urban slums of Bangladesh.

Subas Biswas<sup>1</sup>, Shuchi Karim<sup>1,2</sup>, Sabina Faiz Rashid<sup>1</sup>

#### Abstract

**Objectives** To explore how adolescent and young males negotiate the complex realities of lives to explain their pathways into and reasons for early marriage in urban slums of Bangladesh.

**Design** The qualitative data used here came from a larger three years study that used both quantitative and qualitative research methods.

**Setting** Interviews were conducted in two of the largest slums in Dhaka and Chittagong city of Bangladesh between December 2015 and March 2018.

**Participants** This paper uses qualitative data from 22 In-depth interviews (IDIs) and 3 focus group discussions (FGDs) with adolescent and young males aged 15-24 years; 13 IDIs and 4 FGDs with parents and 11 key-informant interviews (KIIs) with community leaders. The purposively selected respondents were interviewed in their respective settings.

**Results** In the context of urban slums, this study revealed multiple factors influence early marriage decision-making processes among young males. These factors include socially perceived phenomenon of adulthood and readiness of marriage, poverty leading to drop out from schools and early initiation to earning livelihood, manifestations of increasing individual aspiration and agency, fulfillment of romance and erotic desires, and dreams of forming one's own family. In addition, parental and immediate societal interference to preserve norms around gender and society can act as catalysts for this decision.

**Conclusions** Study findings imply that complex structural factors, social and gender norms that are contributing to the early marriage for both adolescent boys and young males in Bangladesh's urban slums. These are locations where conservatism, poverty and urbanization intersect resulting in early and often unprepared entry to adulthood for young males impacting on their development and wellbeing. It is, therefore, critical that young males should be included in the national and global conversations around child marriage and child marriage prevention program.

Key words: Early marriage, Young males, Urban slums, Bangladesh

#### Strengths and limitations of this study

- This is one of the pioneering studies in the context of urban slums in Bangladesh which explored the complex realities, pathways into and reasons for early marriage of adolescent and young males.



- The in-depth qualitative data were collected using follow-up interview sessions spending long days with respondents to capture and understand holistic scenario of the realities and practices of early marriage.
- Data collected from two slums of two cities may not represent the whole adolescent and young males' realities of other slums in Bangladesh but nevertheless this marks the beginning of an exploration to an otherwise ignored group of adolescents from early marriage discussions.
- Due to the issue sensitivity, our respondents might have some conservativeness to open up the information.

## Introduction

Child marriage is a major public health concern particularly in developing countries like Bangladesh. The agenda of 'child marriage' as it pertains to girls has been extensively researched, reviewed and advocated in an effort to eradicate the practice of Early and Child Marriage (ECM) and to comprehend how it impacts the social, cultural, health and economic identity of young girls[1-5]. Most of the existing literature shows that the root causes of child marriage of girls are poverty, gender discrimination, discriminative social norms, patriarchal attitude, lack of awareness and legal loopholes[6,7]. However, there is a huge knowledge gap in regards to young males' ECM and its impact on their lives[8]. Nevertheless, young males also suffer as their early marriage practices can lead to early fatherhood, lack of educational and subsequent better job opportunities— all of which can limit their socio-economic prospects in life, creating pressure to have increased income to provide economic support for family and children. Early life responsibilities affect their life expectation and freedom. Like in case of girls, early marriage can have negative impacts on the physical, mental and sexual health development of young males especially in low resource environments[9-13].

Although the prevalence of child marriage among boys and young males are lower than that of girls, however, this is not an uncommon phenomenon. In a recent analysis, UNICEF reported that globally, 115 million boys were married before the age of 18. Among them, one in five was wedded before his 15th birthday[14]. An evaluation of 82 low and middle-income countries data showed that about one in twenty-five boys marry before they turn 18. However, in South Asian context, this rate is 5%[15-16]. The Bangladesh demographic health survey (BDHS) 2011 stated that about four per cent of men aged 20-24 in Bangladesh get married by the age of 18[17].

Despite this significant figure, there is a dearth of knowledge about young males/adolescent grooms, which essentially means that millions of young males are almost non-existent and/or invisible from past and ongoing research, advocacy, policy and preventive programs addressing early and child marriage. A handful of recent researches indicate that in urban slums in Bangladesh, there is an increasing trend for young males to marry before legal age of marriage[18]. Keeping this rising but mostly unaddressed issue of ECM of young males in general, and in urban low income/slum context in Bangladesh, this paper aims at understanding the factors influencing and contributing to the causes of early marriage among young

1  
2  
3 males, and what implications does this have on the discourse as well as interventions related to early  
4 marriage prevention strategy for all stakeholders. The paper also aims to engage with a deeper  
5 understanding of masculinity and sexuality – which hopefully will contribute in a more nuanced analysis  
6 of gender and marriage as a social construction in the hetero patriarchal society of Bangladesh.  
7

8  
9 The paper is divided into the following sections: 1) Contextual & conceptual framework or background, 2)  
10 methodology, 3) Results, 4) Discussion and 5) Conclusion.  
11

## 12 13 14 **Section 1: Contextual Background**

### 15 16 ***Early marriage and Young males: Context of Slums in Bangladesh***

17 A survey conducted in some selected slums in Dhaka, Bangladesh reported that approximately 80% of the  
18 females and 46% of the males in the slums are the victims of child marriage[18]. Early literature also  
19 explored how poor socioeconomic condition in the context of slums, can make adolescents more  
20 vulnerable to be victims of child marriage[19,20]. In urban slums context of Bangladesh, adolescents living  
21 in exacerbated socio-economic conditions, lack access to correct information, education and life  
22 opportunities. Life of poverty, uncertainties, fear of displacement, violence and social insecurity inevitably  
23 increase the risks of adolescent young males engaging in various harmful practices (i.e. gang involvement,  
24 unsafe sexual practices, drugs etc.). These risk factors intersecting with societal gendered expectations  
25 about male roles and masculinity harm their development and wellbeing[21]. These new phenomena of  
26 child marriage practice amongst young males in low income, high population density urban slum context  
27 are usually not discussed or focused on. Nevertheless, it is important to understand factors that are  
28 shaping early marriage trends. This has implications not only for the young males' emotional well-being  
29 and health, but also for their young counterparts, children and extended families.  
30  
31

### 32 33 **Framing marriageable age**

34 Internationally 18 years is set for adulthood and marriage for males[22], however, Bangladesh has set  
35 legal age for marriage for males at 21 years. Though there is a provision that marriage can be arranged  
36 before this age in special circumstances with consent of legal guardians with a court order[23]. Moreover,  
37 marriage in Bangladesh is largely regulated by personal laws which allow marriage before 18 for both boys  
38 and girls[24, 25]. Thus, legal loopholes and dominance of personal laws along with many other religious  
39 and customary provisions create multiple challenges to prevent child marriage in the patriarchal society  
40 of Bangladesh[26].  
41  
42

43 The perceptions of marriageable age for girls and boys come from the basic social construction of gender  
44 roles in relation to marriage where the male is ideally responsible for financial care of household, to be  
45 the provider and protector of the woman/wife. On the other hand woman/wife is expected to be  
46 responsible for household, care and reproduction[27]. This binary gender roles of provider and dependent  
47 creates an uneven gender power relation, tilted favorably towards the man in terms of decision making.  
48 In other words, a man's eligibility centers on financial capacity and virility, while a woman's eligibility is  
49 centered on her sexual and reproductive ability. However, the issues around the social construction of  
50 boy's marriageable age is much more complex, something that remains unaddressed and unchallenged.  
51  
52  
53  
54  
55  
56  
57  
58  
59  
60

## Boys and young males in the sexual and reproductive health and rights (SRHR) and Child marriage framework

The SDGs have prioritized on 'leaving no one behind' regarding health and wellbeing, education and gender equality with specified targets in goals 3, 4 and 5 to increase access to SRHR for all. Furthermore, Bangladesh government has also set a target to end child marriage by 2041. Therefore, this paper is particularly positioned in the SRHR and child marriage discourse framework. There is a lack of sense of urgency in addressing the issue of boys and young men within the child marriage space.

### Section 2: Methods

This paper is drawn from a broader research project conducted to investigate the underlying issues that lead to early, child and forced marriages in the contexts of specific realities of life in urban slums that lead families to choose child marriage for their children or adolescents to opt for early marriage for them.

#### Study settings, respondents and data collection methodology

The broader study was conducted in two purposively selected slums: Bhashantek slum and Shantinagar slum located within Dhaka (capital city) and Chittagong (industrial city) city corporations respectively; two of the oldest and largest urban slums in Bangladesh.

Broader research project collected both quantitative and qualitative data using questionnaire survey with 2136 adolescent girls and young women aged 13-24 years and 96 In-depth interview (IDI), and 12 focus group discussion (FGD) were conducted with married and unmarried adolescents and young girls and boys aged 15-24 years, their parents and 33 key-informant interviews (KII) with community leaders, teachers, marriage registrars and program people.

To understand the reasons and pathways into child marriage among young males, this paper uses qualitative data from 22 In-depth interviews (IDIs) and 3 focus group discussions (FGD) with married and unmarried adolescent and young males aged 15-24 years; 13 IDIs and 4 FGDs with parents and 11 key-informant interviews (KIIs) with community leaders. Among 22 IDIs with adolescent and young males, 12 were early married and 10 were unmarried. As the main target respondents were adolescent and young males (aged 15-24), the socio-demographic background characteristics of the 22 IDI respondents are presented in Table 1.

Table 1: Socio-demographic background of the In-depth Interviewed (IDI) adolescent and young male respondents in Bhashantek slum of Dhaka and Shantinagar slum of Chittagong, Bangladesh (n=22)

| Socio-demographic Characteristics | Bhashantek (n=13) |                 | Shantinagar (n=9) |                 |
|-----------------------------------|-------------------|-----------------|-------------------|-----------------|
|                                   | Married(n=7)      | Unmarried (n=6) | Married (n=5)     | Unmarried (n=4) |
| Age (years)                       |                   |                 |                   |                 |
| 18-20                             | 2                 | 5               | 1                 | 3               |
| 21-24                             | 5                 | 1               | 4                 | 1               |
| Education (years of education)    |                   |                 |                   |                 |
| <5                                | 4                 | 2               | 3                 | 2               |
| 5 to 9                            | 2                 | 1               | 2                 | 1               |

|                         |   |   |   |   |
|-------------------------|---|---|---|---|
| 10 to 12                | 1 | 2 |   | 1 |
| Age at marriage (years) |   |   |   |   |
| <17                     | 4 |   | 2 |   |
| 18-19                   | 1 |   | 2 |   |
| 20                      | 2 |   | 1 |   |
| Current Income status   |   |   |   |   |
| Having regular income   | 1 | 2 | 2 | 3 |
| Having irregular income | 3 | 1 | 2 | 1 |
| No income               | 3 | 3 | 1 |   |

All of the study participants for qualitative method were purposively selected using snowball techniques covering diverse groups. The question guide aimed to extract information regarding the perception, attitude and practice towards marriage, early marriage and their expectations from marriage and in married life. The guideline also included questions to understand the context that influences young males to get married early and what are the roles they play in these circumstances leading to their marriage, in the decision-making process. After collecting data, verbatim transcript and translation were done of interview recordings, data were coded using Atlasti, followed by thematic analysis.

Data were collected using pretested guidelines phase by phase in two study sites from December 2015 to March 2018 by trained interviewers. All the interviews took place at the participant's own settings. Written informed consent was obtained from all the interview participants. The ethical approval of the study was obtained from the ethical review committee of the BRAC James P. Grant School of Public Health (JPGSPH), BRAC University, Dhaka, Bangladesh.

### Patient and public involvement

Neither patients nor community people of the study sites were involved during the design and development of the study. However, the study team sought expert consultation meetings with the key persons from the academia, researchers as well as practitioners and policy makers. The study results are also shared with national and international communities for advocacy.

### Section 4: Results: Reasons of early marriage among young males in urban slums

Findings revealed that there are many underlying factors that influence a boy's decision to get married early within the context of the urban slum. Theme 1 describes the perception of adulthood among the respondents and how this influence marriage decision making. Theme 2 states the practices and pathways to making of child marriage decision. Under this theme 2, several sub-themes are identified: capacity to earn a living and play role of a breadwinner, to ensure fruitful endings of romantic relationship, to fulfill sexual desire, aspiration to form a family and expand social support network through kinship, and finally, theme 3 states parental perception and societal interference for early marriage decision as a disciplinary act for 'protecting family honor' as well the need to 'stabilize' a boy's future. However, decisions pertaining to child marriages of young males are not made in isolation or made specific to one of these factors.

### Theme 1: Perceptions of adulthood, being a ‘real man’ and readiness for marriage

Regarding perception of adulthood, data from IDI and FGD with male respondents and their parents, it was revealed that there were two stages *na-balok* (*balok*, is a noun, a male child of 15/16 years of age, indicating a state of inexperience and lack of understanding. *Na-balok* is an adjective, not-adult, underage, someone who is not yet old enough to get citizenship rights) and *sa-balok* (adjective, adult or coming of age), which conceptually and colloquially mean childhood and adulthood respectively. The applications of these concepts are for male youth usually aged 13-24. From parent’s point of views, *na-balok* is not a specific age, but rather a life stage when young males are under parent’s care, not capable of understanding and differentiating between what is good or bad for them. It also implies lack of financial capacity as they are not able to generate steady income or take responsibilities for themselves or families. One the other hand, when a boy can earn, he is understood to be capable in differentiating between good or bad, take responsibilities – therefore, irrespective of the actual age, this capacity of earning and awareness of the world grants him adulthood, and he transitions from being a ‘*na-balok*’ to a ‘*sa-balok*’.

*“A boy is considered as a man (baro hoyese-become grown up or adult) when he can work and earn enough to feed his parents and family members. He can understand good or bad things for his life and capable of taking his own decisions - the right decisions. He can take responsibilities of his own and also a wife . . . then he can marry as he has capacity to feed his wife including his parents.”* (Mother of adolescents, age 55yr)

Adulthood for a boy includes capacity to take responsibilities of his immediate family along with the potential of taking a wife, thus starting his own family on time. Therefore, adulthood for male gender is about having the capacity of becoming a breadwinner and fulfilling society given gendered responsibility of ultimately becoming head of the extended household – not only with the purpose of a nuclear unit of his own. Here, age is just a number, and adulthood relates to social and gendered concepts of roles and norms. And when a boy earns these characteristics of adulthood, he is also granted the right of marriage and considered a ‘real man’.

But we also see change in this social concept and practice of adulthood in relation to manhood for young males, as increasing exposure to education and social advocacy awareness programs convince young men to marry at a later age:

*“For adult, 18 is not enough, you need more 6-7 years You need job and income, enough income. . . . Before 27-28-30 (years of age), you will not be able to establish financially. Only age, physical growth is not enough (to be an adult)”.* (Unmarried boy, age 21)

There is also awareness that income only cannot make a young male ready for big responsibilities of life, like marriage. In the context of Bangladesh, and increasing financial hardship, some felt that it is okay for a male to delay or stretch the boundaries of marriage age as long as needed. Higher the educational aspiration and qualification the later he is able to financially become independent and hence delay the marriage. But the bottom line of either side of the argument is that age of marriage for a young male is dependent on being perceived as a financially capable man, who is ready to take on family responsibilities – depending on whatever socio-economic-educational background one belongs to – but never depending on what the legal framework might dictate.

1  
2  
3 It is important to briefly compare perceptions of boy's age of marriage with that of girls by the same  
4 respondents as it clearly indicates differences in norms and practices based on genders. A girl's readiness  
5 for marriage is viewed as being dependent on her biology, at the wake of puberty. When a girl reaches  
6 puberty, her body shows physical forms of womanhood and reaches menarche – she is believed to be  
7 ready for marriage. The social understanding of girl's purpose and readiness of marriage is her capacity of  
8 reproduction, to be able to take care of household responsibilities and be in service of her husband and  
9 in laws. Financial dependence, not independence is a primary concern for girl's marriage as female gender  
10 is considered as responsibility (and burden) for her male custodians (Father, brother and/or husband).  
11 Therefore, reasons influencing the age and readiness of marriage for male and female have almost polar  
12 opposite positioning of age, income and responsibilities. In the poor socio-economic contexts of slums in  
13 Bangladesh, adolescents have to play adult' roles for which they are not ready for- be it marriage or  
14 income generating activities. For the greater benefits of their families they have to engage in income  
15 generating activities earlier to extend financial help to their family (in case of young males), or marry into  
16 another family (in case of girls) – as a strategy for their respective survival. Thus, community people,  
17 parents, even young males in both slums considered income of a boy as the primary attribute to be able  
18 to get married.  
19  
20  
21  
22  
23  
24  
25

## 26 **Theme 2: Decision and pathway into early child marriage of young males**

27  
28 The data revealed that a very common pathway of young males' lives in urban slums is poverty that results  
29 in discontinuation of education. Even though young males, because of their social privileges of gender get  
30 priorities in families to continue education, usually – poverty is nevertheless a reason for them to drop  
31 out from school due to lack of financial resources. There is also an additional reason of peer pressure as  
32 young males from similar age group and backgrounds tend to drop out of schools for various reasons and  
33 manage to secure some kind of job in the informal sector as they are expected to support the family.  
34 Seeing peers earning money and gaining independence are markers of adulthood that encouraged many  
35 to leave school and aspire to earn, take control of life decisions and feel that they are adults. Besides  
36 these, many of the young males get married early to bring fruition to their romantic relationships, to fulfill  
37 their desires to form a family and expand social support network through kinship, and finally to fulfill  
38 newly found sexual desire, which can continue under the umbrella of marriage. Many times parents and  
39 families also encourage and support young males at a young age to fulfill these desires and aspirations to  
40 start their adult lives as it is considered to socially more acceptable and respectable to organize marriage  
41 by families than allowing children to elope or take independent decisions.  
42  
43  
44  
45

### 46 **2.1 Out of school, engaging in income generation: Gaining agency and sense of adulthood**

47  
48 As presented in previous section, adulthood and age of marriage for young males in urban slums are  
49 primarily gained through work and economic capacity before reaching legal age of adulthood. Slum  
50 populations are consisted of internally migrated people/families from rural areas often caused by poverty,  
51 displacement and economic aspirations for better future in the cities. Slum dwelling is also a socio-  
52 economically instable reality for its dwellers live a marginalized existence with a constant threat of  
53 evictions and lack of basic amenities. The pressure to earn a living to keep households running is on almost  
54 every member of slum households, especially on young males because of their gender. This happens in  
55  
56  
57  
58  
59  
60

1  
2  
3 households where the father is either not working, or has died, or has left the household or there is a  
4 stepparent who is unwilling to support the rest of the household. These social and economic instabilities  
5 in slum communities lead a majority of adolescent boys to drop out of school and become early seekers  
6 of employment. IDI and FGD with young males and parents found that school dropout is very common in  
7 urban slums and the most cited reason is lack of financial support. Parents prefer to send their young sons  
8 to work so as to provide the family with additional income and ease the burden of ever increasing  
9 expenditures of urban living. Sometimes, because of the pressure of economic uncertainties, adolescent  
10 young males themselves often decide to drop out of school and engage in income-generating activities.  
11

12  
13  
14 Generating income for a household also translates into a sense of power, agency and ability to reposition  
15 oneself within a household. For young males, even though circumstances might push them to assume  
16 their ultimate gender role of the head of household at a much early age, this eventually grants them some  
17 unprecedented freedom to make decisions for themselves. The transition to 'sa-balak' status through  
18 assuming financial responsibility for an entire household translates into some degrees of control regarding  
19 their personal lives. A 23 year old young man in Bhashantek slum, got married at 20, explained the context  
20 of economic freedom, agency and decision-making process-  
21

22  
23 *'I had an income. . . I could feed a family. I don't know whether I was at the marriageable age or*  
24 *not but personally I think, I was ready to get married. So, I did (got married).. . I think, age was*  
25 *never a problem.'*  
26

27  
28 During a KII, a male community leader (55 years old) in Bhashantek slum explained it further:

29  
30 *"As he (a boy) earns and feeds his family members, parents also have some kinds of economical*  
31 *dependency. If he (the boy) wants to marry, parent may try to prohibit or may not readily agree*  
32 *to his proposal but they cannot create pressure. If they do so, the boy may get married by himself*  
33 *without the consent of his parents. It is disgraceful (for parents). So, parents agree with such*  
34 *marriage."*  
35

36  
37 Thus, the idea of having income and potential responsibilities and capacities to take care of a wife define  
38 the age of marriageable stage and this leads young male to the decision of marriage.

## 39 **2.2 Desire for family formation, building kinship and expansion of social networks: Marriage as a medium of social** 40 **and economic stability**

41  
42 An early married young male talked about role of marriage as a pathway or means to bringing regularity  
43 and stability in one's life. His father remarried after his mother's death and lived in a separate household  
44 in the same slum. He felt that marriage brought back some stability, motivation and discipline in his life,  
45 which was very much lacking when he lived without a guardian or loved one. He lived in Bhashantek slum,  
46 stated-  
47

48  
49 *"Before my marriage, I had enough earnings and could feed my family members. But I would*  
50 *spend all my money to buy cloths, hang out with friends and at the end of the month, I was empty*  
51 *handed. Then I thought, if I get married, I would have to push myself to work hard and earn more.*  
52 *I thought, I need a family life otherwise I wouldn't be going forward with my life."* (Age 23, married  
53 at 20)  
54  
55  
56  
57

1  
2  
3 All adolescent respondents mention that marriage is a mandatory and obligatory socio-religious norms  
4 which is unavoidable and non-negotiable. As boys, they are expected to get married at some stage of their  
5 lives and head the family household. There is a common perception that everybody must form a family  
6 and everyone should get married at some stage of their lives. This role of a husband, a father and potential  
7 head of family – is a role that one must fulfill as part of his duty in life. Because boys in urban slums are  
8 either forced by circumstances to earn a living and be economically independent earlier in life – most did  
9 not see any good reason to delay fulfilling their other duty, i.e. marriage.  
10  
11

12 Marriage, in a traditional South Asian/ Bangladeshi cultural context is not only a norm but it is a social  
13 institution that is used as the basis of expanding kinship, social network and resources. Kinship and  
14 families work as social safety networks, especially for low income urban poor slum dwellers that depend  
15 heavily on kinship and such networks for survival in cities. For many young people, life in slums is devoid  
16 of experiences of extended family, support and nurturing – and marriage is seen as a way to acquire these  
17 experiences along with gaining valuable social capitals. Desiring kinship and extension of social network,  
18 is cited by an orphan boy in Bhashantek slum. He lived with his distant maternal uncles before his marriage  
19 (). He stated that his uncles also influenced his decision of getting married at a young age:  
20  
21  
22

23 *“They (uncles) told if I got married, I would have a family, I would have in-laws and a guardian*  
24 *through them. As I had no one, I thought my wife and her family would give me the support I*  
25 *needed. . . At that time, I also thought, it would be better if I got married since my wife would be*  
26 *able to take care of my family, my food, washing my cloths.’ (Age 24, married at 16)*  
27  
28

29 In hetero-patriarchal social arrangement of marriage, if the boy is expected to ensure financial support,  
30 the girl (wife) is expected to bring free labor to support and care for her husband and his household.  
31 Marriage is not only about love or sexual desires being fulfilled, but the economic aspect of providing in  
32 exchange of free labor at household level in terms of care services – is a transactional reality.  
33  
34

35 Respondents mentioned that girls usually have to stop working in paid labor market after marriage.  
36 However, in the slum context where most of the families were living under poverty, many of the girls  
37 continue their jobs even after marriage to support in-law’s family or husband with their permission. An  
38 early married boy who had a romantic relationship with his colleague in same garment factory and got  
39 married, supported this aspect and utility of early marriage:  
40  
41

42 *I decided to get married as we needed a support for household work. My mother cannot do any*  
43 *work, she is a diabetic patient. My sister goes to work in a garment factory. It is not possible for*  
44 *her to do all the household chores. I felt that I needed to bring in a support. As she (wife) was able*  
45 *to do household works and she could also earn. I though, it would be better to run our family with*  
46 *her income and my income.” (Age 18, married at 17).*  
47  
48

49 Unfortunately, a few months after their marriage, this boy lost his job and at the time of interview, he was  
50 very much worried regarding inability to maintain household financial responsibilities. All of the early  
51 married males expressed that marriage brought many and overburdened responsibilities into their young  
52 lives, which they were not prepared for. The pressure to earn and be responsible for a family or household,  
53 gave rise to psychological stress to them. Another early married boy expressed his feelings-  
54

55 *‘At times I do not feel good since I am unable to give anything to my wife. I have no income and I*  
56 *have to depend on my father. But I am married, and when my wife asks for something, I cannot*  
57  
58



1  
2  
3 *provide it to her. It is not always possible to ask money (from my father) for me and my wife.” (Age*  
4 *21, married at 20)*  
5

6 Moreover, it was common for young males to stop their education mid-way in school or opt for low  
7 income employment opportunities as they had no prior skills or experiences in better paying jobs. These  
8 situations limited their scope to earn more, forcing them to opt for low income, unskilled and physically  
9 laborious jobs.  
10

11 As our respondents stated that adjusting to new adult responsibilities like earning, marriage, financial  
12 responsibilities of running a household and balancing new relationship dynamics in the family and society,  
13 settling down to a routine of domestic situation yet remaining entitled to young masculinity challenge  
14 their gender and sex role performance, and create a stressful situation in their lives. Though culturally  
15 most of these new life situations often fall on the bride/young girls’ shoulders as she is expected to  
16 become an adult all on a sudden – it is not that different or easy for the young men.  
17  
18

### 19 **2.3 Fulfillment of sexual desire**

20  
21 Sex is a taboo topic in Bangladeshi society, and bound by marriage normativity (even though fulfillment  
22 of sexual desire is considered as the primary basis of all marriages). In the discussion of marriage, issues  
23 of sexual and reproductive health and rights are still difficult to bring into conversations, especially with  
24 young people. Fulfillment of sexual desire is nevertheless cited as one of the reasons to influence young  
25 males’ decision to get married early. During one to one interviews and some informal discussions, some  
26 respondents did admit that desire to have sex was one of the driving forces to get married so early. Sex  
27 outside marriage and before marriage is considered sinful, is socially condemned and is matter of public  
28 shaming (when revealed) – marriage remains the only legal and socially acceptable way of fulfilling sexual  
29 desires, which is natural for everyone. To pursue a regular sexual relationship without negative  
30 consequences, marriage is considered as a valid pathway for young men.  
31  
32  
33  
34

35 *“Outside of marriage, I will not always get to fulfill my sexual desires. Even if I want to have sex*  
36 *with a prostitute, I need money! But then she (partner outside marriage) may complain about me*  
37 *or file a case against me! So many people think it is better off to marry a girl instead. Then I can*  
38 *have with her anytime and no one will say anything.” (Age 24, married at 16)*  
39  
40

41 Sexual satisfaction, or at least fulfilling one’s sexual urges/desires is considered to be a male entitlement.  
42 Through marriage, a young male desires to have easy access to sex with his wife without having to spend  
43 money. Regarding this issue of young male’s sexuality, sexual awareness and desires, a local school  
44 teacher tried to explain social reasons:  
45

46 *“Most of the adolescent now a day, have access to the internet. Those who do not have their own*  
47 *mobile phones, their friends have it and they share phones for watching pornography. It may also*  
48 *influence sexual desire. Adolescents get involved in sexual relation out of marriage to meet up this*  
49 *desire, which is not socially accepted. Also, partners are not always available (to monitor). They*  
50 *are also involved in some risks as society does not approve of sex out of marriage. It may be*  
51 *another cause of getting married earlier for the adolescents.” (Teacher, age 39)*  
52  
53  
54

55 Pre-marital relationships are not socially or morally accepted in the social fabric of Bangladesh, as such  
56 relationships attract varying degrees of punishments from communities, families and other social/legal  
57

1  
2  
3 structures. Study findings suggested that the desire for sexual fulfillment among adolescent boys plays a  
4 vital role as a cultural factor influencing decisions pertaining to child marriage. However, many of the  
5 young male respondents reported that husbands lost attraction to wife day by day and they got involved  
6 in extramarital relationships. Furthermore, due to lack of awareness and poor participation in sexual and  
7 reproductive health services, early fatherhood was a common phenomenon among the early married  
8 young males in urban slums. It created an extra psychological stress as they were not able to meet the  
9 demands and proper care of children.  
10  
11

#### 12 **2.4 To ensure fruitful endings to romantic relationships**

13  
14 There was a common perception across all of our respondents that the prevalence of romantic  
15 relationships between adolescent boys and girls in the slums was on the rise, or at least young people  
16 were more open about being involved in relationships. They mentioned that mobile phone affordability  
17 and accessibility had made it easier for adolescents to communicate with each other, engage in romantic  
18 relationships and bypass guardian's surveillance. Moreover, due to the very congested nature of slums,  
19 young males and girls could easily interact with one another and neighborhood surveillance of adolescents  
20 is far lower than it is in rural areas.  
21  
22

23  
24 Findings showed that once adolescents engaged in a teen romance, there is a fear of losing 'love', which  
25 results in deciding to get married as early as possible. A few respondents decided to marry "simply out of  
26 love" and due to a fear of losing their girlfriend to someone else if they were late by waiting for adulthood.  
27 A boy who had a romantic relationship with his colleague in same garment factory and got married by  
28 eloping, stated-

29  
30  
31 *"As I am a boy, one day I have to be married. I will have to form a family; I will have one or two*  
32 *kids. As I loved this girl, I didn't want to lose her, so we got married..."* (Age 18, married at 17).  
33

34 Young males often become emotionally insecure and frustrated in romantic relationships at this age.  
35 Under emotional pressure they assume that only marriage can provide social acceptance to an otherwise  
36 frowned-upon romantic relationship. Among four cases of elopement, all respondents made the decision  
37 of elopement as they feared succumbing to family pressure to end relationships otherwise.  
38

39  
40 *"In our area, most of the early marriage occurred here due to love relation. Parents allow early*  
41 *marriage in a crucial situation. . . . In our area, most of the marriage occurred due to the relation.*  
42 *When the boy & girl left home and elope together for love affection and come back in the slum*  
43 *after some days, in that time parents arranged for their marriage. . . . Out of 100, 80 early*  
44 *marriages occurred here for love affair and most of the formal marriages were performed for*  
45 *leaving home with the partner."* (Young male in FGD, age 20)  
46  
47

48 Unlike other cases, where young males made independent decisions (often in agreement with parents) to  
49 marry early because they had financial agency and independence, in most cases of elopement, young  
50 males did not have any earning and were dependent on their parents. The rushed decision of getting  
51 married before reaching 'adulthood' was based on fear of losing the loved one. Rejection of romantic  
52 relations by parental families can put tremendous pressure on young couples. For example, a young male  
53 (age 19, married at 17) and young female (age 19, married at 17) who were college students, had two  
54 years of relationship but the girl's family did not accept the relationship, so they decided to elope and get  
55  
56  
57

1  
2  
3 married. After getting married in the *Kazi* (marriage registrar) office, they stayed outside the slum for six  
4 months and returned only afterwards when both families accepted their marriage. Respondents  
5 mentioned that publicly declaring one's romance and being seen to be in a relationship are considered to  
6 be tabooed, and as a marker of dishonor to the family. There is always a fear of a girl being led to romantic  
7 relation with a promise of marriage and that promise being unfulfilled – that fear of disgrace is real and  
8 parents keep vigilance over young people all the time. On the other hand, it is also disgraceful for a boy if  
9 he fails to marry his girlfriend. When family member and guardian do not accept this relationship, or boys  
10 and girls fall into an uncertain situation about their future around this relationship, from the fear of losing  
11 this relationship, they decide to get married.  
12  
13  
14

15 Peer influences play a significant role in influencing decision-making processes when young males get into  
16 romantic relations. Some young males shared that they were influenced to engage in romantic  
17 relationship by listening and observing their other friends/co-workers that may be older or in a similar age  
18 group who are engaging in such relationships. In an FGD, respondents also mentioned that married  
19 adolescents could influence their unmarried adolescent peers through sharing stories of their sexual  
20 encounters, which instigates the desires and curiosity of young minds. Friends can influence young lovers  
21 to marry immediately as they offer social and moral support to the couples, even assisting them with their  
22 elopement plans.  
23  
24  
25

### 26 **Theme 3: Parental and societal interference and influence: marriage as a disciplinary act**

27 According to respondents, especially by parents mentioned, young males who dropped out of education  
28 and are searching for employment opportunities or were unemployed for some time - remained at risk of  
29 engaging in practices such as drug addiction, gambling, gang involvement and violence, which were  
30 prevalent in slum communities. As a result, most families lived with a constant fear that their adolescent  
31 boys might easily become involved in these risky practices. To reduce the chance of their young sons  
32 engaging in risky behaviors, some parents resorted to their son's marriage as an effective means of  
33 ensuring young males would be brought back to discipline.  
34  
35  
36

37 , One mother (age 45) of an early married adolescent boy in Shantinagar, mentioned that her son was  
38 eager to get married at the age of 16, right at the onset of his puberty. Her son was already working as a  
39 daily labor and therefore had an earning. She and her husband did not agree with their son's wish to be  
40 married so early in life. In response and resistance, the young male stopped working regularly, started  
41 hanging out with friends, stayed away from home and started using drugs. After some time, she and her  
42 husband gave into their son's wish and arranged for his marriage because they feared their son was going  
43 astray and would be derailed in life. Marriage was, therefore, not only a fulfillment of their young son's  
44 desire, but also a socially acceptable method of controlling an unruly young male in a difficult environment  
45 where rule of law was absent.  
46  
47  
48

49 In Bangladeshi culture, parents have control and ownership over children's lives. Important life decisions  
50 are made by parents, or at least in agreement and consent with them particularly marriage decision. When  
51 searching for a bride for the boy/young man, parents or guardians mostly consider potential bride's  
52 physical appearance, politeness, bride's parent's social and economic status. Usually, love affair or  
53 choosing own brides by sons are not socially well accepted in the Bangladeshi context. When any son does  
54 it, it is a matter of shame and dishonor for the parents. Even if any son makes his own choice in romance  
55  
56  
57

1  
2  
3 and marriage, they inform parents and parents usually arrange their marriage. If parents or guardians do  
4 not agree with their son's choice and decision many of the young couples might choose to marry without  
5 parental consent. But in general, everyone wishes to marry with family consent and support.  
6

7 *'... if our parents want, then we have to marry. We cannot do anything else at that time. But we*  
8 *are not like some guys who want to marry without doing anything. We have to wait for our family*  
9 *order, we cannot break the order'* (Unmarried young male in FGD, age 21).  
10  
11

12 Marriage often is used as a disciplinary act to reign in an otherwise unruly son and help his guide back to  
13 a disciplined homely life:  
14

15 *'Suppose someone at 15 earns a lot, like 1000 BDT a day by driving. Now his parents can marry*  
16 *him off. Parents think that the boy has his own income and he may involve in bad practice such as*  
17 *drug use, buy sex . . . they think of getting him married...it will pull him to his wife and not towards*  
18 *bad things. And if there is a child – he will not go towards drugs and alcohol, because when he*  
19 *sees his child's potential future, he is discouraged'* (an unmarried young male in FGD, age 22).  
20  
21

22 If early marriage can be an outcome of young love – it is also true that early marriages are sometimes  
23 organized by parents who want to save family honor from being tarnished by their adolescent children's  
24 love/romantic relationships. Young respondents expressed that no matter what might be the nature of a  
25 romantic relation between a young boy and a girl – in slum societies, it is always seen with suspicion of  
26 immorality and of sexual nature. The collective suspicion and condemnation of any kind of relation  
27 between a young boy and girl can put a seal of disapproval and shame on family's name. Parents not only  
28 fear children engaging in premarital sexual relations, but also untimely elopement of young lovers – both  
29 of which are matter of disgrace.  
30  
31

32 Sometimes social scrutiny and pressure can cause parents to arrange for their children's untimely and  
33 early marriages, for example, one young male in Bhashantek (age 21, married at 20) had friendship with  
34 a girl, now his wife (age 17, married at 16) near to their house. Both of them were in class nine and their  
35 relation at that point was nothing more than a likeable friendship. But their neighbors accused them of  
36 having premarital sex and complained to his parents about his conduct based on their suspicion. This  
37 brought tremendous pressure on the families, and on the adolescents. To save families and the young  
38 people from social shame and condemnation, his family arranged his marriage with her even though they  
39 both were below their legal age of marriage.  
40  
41

42 Thus, the community plays an important role in early marriage, in both rural as well as urban slum  
43 locations. In the tightly spaced and squeezed living arrangements of slums, it is impossible to ignore or  
44 avoid neighbors, their opinions and influences, particularly in those sections that are tightly bounded.  
45 Slums are also socially organized through common norms, influences of religious bodies and social  
46 leaders. Sometimes, local leaders and society can interfere, support and even organize early marriages if  
47 they deem a situation to be crucial to uphold social morality. Local leaders and heads accept early  
48 marriage to 'save family honor' in cases where adolescents engage in romantic relationships with each  
49 other.  
50  
51  
52  
53  
54  
55  
56  
57  
58  
59  
60

#### Section 4: Discussion

Our study findings show that gendered social norms, patriarchal and masculine construction shape the decision and pathway into marriage of young males. These decision-making processes might be initiated by personal choices or parental wishes or under social pressures – but at the end of the day these factors intersect with each other and culminates into an early marriage. The pathways to early marriage for young males in urban slums are complex. Findings show that the decision of marriage is not based on appropriateness or legal age for marriage rather based on their capacity to earn, to provide financial responsibilities to family, willingness to form a family and expand social network, enjoy sexual life, to bring additional labor in form of a wife to support household work. It is also perceived that marriage is a medium to control sexuality, body and mind including bad habits like addiction, extramarital sexual relation. Thus, parents and society interfere to arrange marriage to protect family and societal honor if it finds a young male to be at risk of being morally derailed. Our study results also support other research findings regarding the key drivers of child marriage practice among young males and young males conducted in the low and middle income countries in South Asia and Africa[28]. What we see in this research discussion is how gender, adulthood and marriage is lived through the social constructions of masculinity, gender stereotype roles and patriarchal ideology. Each of these shapes the attitude towards marriage and decision of child marriage among young males in these particular settings. Early marriage here is understood under the broader framework of adolescent sexual and reproductive health and rights (ASRHR). Hopefully findings from this research will help us to incorporate issues of gender and adulthood along with masculinity in ASRHR and child marriage prevention framework to address the problems for a sustainable solution.

The decision of marriage among the married respondents was influenced by dominant masculine and gender role ideologies. In patriarchal domain, males are the main breadwinner for family and they mainly take the financial responsibilities of family. In the context of the patriarchal society of Bangladesh, males and husbands are considered as the breadwinner for family and it is essential to establish dominance in his family and society[29]. Perceptions of masculinity in Bangladesh are dominated by concepts of strength, fear, honor, power, sexuality – and marriage plays a central role in fulfilling all these roles for men as it indicates health, power and financial capacity[18]. Thus, it is seen in this research that when a young male has income, it automatically elevates him to the stage of adulthood. This strong sense of an emerging adult identity pushes young males to think that they are now capable of getting married as they are assuming the role of a breadwinner. The whole process of negotiating agency for personal matters (like romance, marriage, sex) which are otherwise almost non-negotiable at a '*na-balak*' stage with no monetary power, now gains power to bargain with social norms and expectations (of staying asexual or childlike till marriages are arranged by family and elders). Compared to middle class and economically privileged children from the same society, where children gain social perceptions of adulthood much later in life as they live under the financial shelter and control of parental households – slum children, especially the young males gain adulthood and subsequent agency as a default outcome of lack of opportunities to stay children for as long as possible, as per Bangladeshi norms[30-32].

Other studies showed that peers are the one of the most influencing group for adolescents in working place, schools or neighborhood[33, 34]. Respondents in the study showed a clear trend in thinking of peer

1  
2  
3 support as a strong backup system in making decisions about marriages. Evidence in Bangladesh in urban  
4 slum showed that peer influences, parental will and care, social environment and adolescent's personal  
5 choice also play role in how adolescents will continue their lives in slum environment[35]. Our study  
6 showed that peers had a significant influence to think about marriage as marriage gives them an adult  
7 identity which gradually places them as a significant and powerful male member of the family. Young  
8 males also get influenced by observing other married young males of similar age and contextual  
9 background. In the workplace, there are examples of many other peers who already are married at a  
10 relatively early age. Interaction with them, discussion about their married life also may have influence on  
11 adolescent young males into desire to get married.  
12  
13  
14

15 According to the study respondents, a trend of love relationship among adolescent and young generation  
16 is prominent than before. Young males who are in romantic relation, expressed that losing their girlfriend  
17 as wife is disgraceful for them, counted it as a defeat of being as a man. So, they marry by eloping and out  
18 of guardian's consent as they want to prove their power as a man. This masculine attitude also accelerates  
19 child marriage among young males in the study context like urban slum.  
20  
21

22 Our findings revealed that access to movies, pornography influence and shape the need to be sexually  
23 active and in a relationship. Other studies also support this findings that watching pornography/adult  
24 sexual content can negatively influence young males, which motivates them to get involved in premarital  
25 sexual relationships and shapes their ideas of sex, sexuality and relationships[36, 37]. Respondents agreed  
26 that marriage guarantees regular sex and a sexual partner. With marriage, sexual desire can be fulfilled  
27 without any additional costs or hassles.  
28  
29

30 Findings reveal that, parents are always in fear of their adolescent and young male child getting involved  
31 in gang violence, drug addiction or other anti-social activities. There are also evidence that norms, attitude  
32 and perceptions about heterogeneous masculinity often instigates adolescent young males to engage in  
33 unsafe harmful practices such as practicing violence against others, risky sexual practice, involvement in  
34 gangs, and substance abuse[38]. In the economically, socially and politically marginalized slum setting,  
35 where adolescents lack parental guidance and are surrounded by violence, exploitation and abuse, these  
36 vulnerabilities of adolescence can be far greater and more damaging[39]. Respondents informed that  
37 crimes, sexual and physical violence, drug addiction in urban slum area are very common. Earning capacity  
38 at a relatively early age in life not only grants some privileges of adulthood in terms of autonomy in  
39 spending money, but it also gives resistance to otherwise omnipresent parental surveillance. This capacity  
40 to earn and spend money can easily draw young males to 'bad habits and influences'. Other studies also  
41 showed same evidences[40]. So, parents feel insecure about their sons' lifestyle, and their lack of control.  
42 Therefore, they try to engage their sons into work and often in marriages. It also helps parents to secure  
43 their financial needs for family. Parents along with (and often under pressure from) other people in society  
44 perceive 'marriage' of a young male may be a strategy to protect and to keep control from any uneven  
45 practice and a disciplinary act. They perceive that 'marriage' creates some responsibilities and  
46 accountabilities to wife and family.  
47  
48  
49  
50  
51  
52

53 After parents, it is immediate and extended families, as well as kinship that play significant roles in shaping  
54 children's lives, when it comes to marriage. Reputation, acceptability, social position and respect – aspects  
55 of lives that are considered as prized possessions, especially in newly urbanized lives in slums, where  
56  
57

1  
2  
3 survival can depend on social networks – neighbor's, local people and leaders' opinion on relationships  
4 and marriages matter. Often time of marriage is decided by these external forces even if the adolescent  
5 boy or his parents might want to decide otherwise.  
6

7 Early marriage takes place for both girls and boys irrespective of what gender norms and values one might  
8 harbor. Adolescent boys negotiate a complex web of gender privilege, emerging adulthood, agency and  
9 social network and influences in making important decisions of life, like marriage. The matter of early  
10 marriage, for adolescent urban slum young males, is rarely a case of vulnerability and victimhood, like  
11 majority of their female counterpart. Agency, consent and desire to start family, sexual partnership, to  
12 run a household and provide support to parental households with additional (free) labor – are major  
13 reasons that influence adolescent boys' decision to marry earlier than legally sanctioned age by the state.  
14

15 This is a first time attempt to explore the perspectives, underlying reasons that influence the decision of  
16 early marriage of young males in urban slum context of Bangladesh. However, data were collected only  
17 from two slums which may not portray full scenario and realities of other slums in Bangladesh. Due to the  
18 sensitivity of the topics, such as, early marriage, sexuality, drug addiction, violence, power politics in slum  
19 community, many of the respondents might be conservative to express their views and practices.  
20 However, it might have a minimal effect on findings as method triangulation and data source triangulation  
21 were performed to verify the information. This paper is nevertheless a start to the discussion regarding  
22 the early marriage decision of these ignored and vulnerable groups. The entrance point of the  
23 perspectives of adolescent and young males to understand early marriage is important and needs more  
24 explorations and understandings in the discourse of preventing early marriage.  
25  
26  
27  
28  
29  
30

### 31 32 **Conclusion**

33 Our study reveals that the issue of early marriage, in low income urban slum contexts, has many different  
34 entry points for young males. Researches show that increasingly both young males and females are getting  
35 married early with their own consent, and in this research, it is evident that young males have greater  
36 voice and agency to give consent to marriage even if they are not technically (legally) adults.  
37  
38  
39

40 From the findings of this research, we get a glimpse of how in low income socially vulnerable context of  
41 urban slums, adolescent young males negotiate adulthood processes in a complex but gender unequal  
42 spectrum of power and agency, and when it comes to marriage, these gendered power, privileges and  
43 agency pave pathways in asserting decisions that are otherwise not even legally granted to them.  
44

45 In slum contexts, where space and livelihood is earned with a premium, and newly urbanized families  
46 struggle to find a footing in an already crowded and competitive city like Dhaka or Chittagong, there is a  
47 constant conflict, pull and push of norms, traditions and modernity – and young people are at the center  
48 of these shifting norms and ideas. The new realities of urban spaces bring new realities and definitions of  
49 adulthood, and we clearly see that adolescent young males find new agency with new economic prowess.  
50 In the context of the urban slums, the perceived phenomena of adulthood, decision-making capability,  
51 aspiration towards marriage, family formation and sexuality influence the marriage decision-making  
52 process especially child marriage among the young males in the context of urban slums of Bangladesh.  
53  
54  
55  
56  
57  
58  
59  
60

1  
2  
3 When an adolescent boy is considered as adult mainly based on his income ability and marital status, he  
4 is deprived of opportunities for his growth and development. Moreover, child marriage cut short the  
5 adolescence of young males and compromises their fundamental human rights. It affects their education,  
6 earning power and economic prospects, expectation, freedom, physical and psychological health and  
7 social life, however, nominal attention is given to the vulnerabilities of young males[41, 42].  
8  
9

10 Adolescent and young males' child marriage has many risk profiles that not only negatively affect their  
11 own situation but also have impacts on their partner's and family life. As long as child marriage prevention  
12 program only focuses girls with nominal focus on young males, it will be difficult to address child marriage  
13 holistically. A clear understanding about male's understandings, behavior and practice regarding child  
14 marriage are crucial to design interventions and programs to support this group of young men to stop  
15 child marriage.  
16  
17  
18  
19  
20  
21

## 22 **Author affiliations**

23 <sup>1</sup>BRAC James P Grant School of Public Health, BRAC University, Dhaka, Bangladesh

24 <sup>2</sup>Women's Studies and Feminist Research, University of Western Ontario, Canada

25  
26  
27  
28 Correspondence: Subas Biswas; subasbiswas@gmail.com  
29  
30

31 **Acknowledgements** The authors would like to thank the study participants and BRAC field staffs for their  
32 assistance during fieldwork. The authors also thank to the research team and data collectors.  
33

34 **Contributors** SFR and SB conceptualized and designed this study. SB analysed the data; SB and SK drafted,  
35 revised and finalized the manuscript. SFR, Principal Investigator of this study made final review and  
36 feedback on and supervised the manuscript. All authors read and approved the final manuscript.  
37  
38

39 **Funding** This work was supported by the research grant from International Development Research Centre,  
40 Ottawa, Canada; Grant number 108011-001.  
41

42 **Competing interests** There are no competing interests for any author  
43

44 **Patient consent for publication** Not required  
45

46 **Ethics approval** The study received ethical approval from the Ethical Review Committee of BRAC James  
47 P Grant School of Public Health, BRAC University, Dhaka, Bangladesh (Ethics Reference No: 91, 18  
48 October 2016).  
49

50  
51 **Data availability statement** Data are available upon reasonable request  
52  
53  
54  
55  
56  
57



## References

1. Parsons J, Edmeades J, Kes A, Petroni S, Sexton M, Wodon Q. Economic impacts of child marriage: A review of the literature. *The Review of Faith & International Affairs* 2015; 13(3):12-22. Available: <https://doi.org/10.1080/15570274.2015.1075757>.
2. Wodon Q, Male C, Nayihouba A, Onagoruwa A, Savadogo A, Yedan A, et al. Economic impacts of child marriage: global synthesis report. Washington, DC: The World Bank and The International Center for Research on Women (ICRW) 2017. Available: <http://documents.worldbank.org/curated/en/530891498511398503/pdf/116829-WP-P151842-PUBLIC-EICM-Global-Conference-Edition-June-27.pdf>
3. Patton GC, Sawyer SM, Santelli JS, Ross DA, Afifi R, Allen NB, et al. Our future: a Lancet commission on adolescent health and wellbeing. *The Lancet* [Internet] 2016; 387(10036):2423-78. doi: [https://doi.org/10.1016/S0140-6736\(16\)00579-1](https://doi.org/10.1016/S0140-6736(16)00579-1)
4. Svanemyr, J., Chandra-Mouli, V., Raj, A. *et al.* Research priorities on ending child marriage and supporting married girls. *Reprod Health* 2015; 12:80. <https://doi.org/10.1186/s12978-015-0060-5>
5. Lowe E, Kharoufeh N, McKinley B, McDonald E, Alphonse P, Boustani R, et al. The Development of Global Responses to Child, Early and Forced Marriages. HAQ Centre for Child Rights (Haqrcr) and Macquarie University 2017. Available: <https://EconPapers.repec.org/RePEc:ess:wpaper:id:12245>
6. Marcus R, Harper C, Brodbeck S, Page E. Social norms, gender norms and adolescent girls: A brief guide. London: Overseas Development Institute 2015. Available: <https://www.odi.org/sites/odi.org.uk/files/odi-assets/publications...files/9818.pdf>
7. Hodgkinson K, Koster W, Miedema E. Understanding and addressing child marriage: A scoping study of available academic and programmatic literature for the HER CHOICE Alliance. Amsterdam Institute for Social Science Research (AISSR) 2016. Available: <http://hdl.handle.net/11245.1/61e74e50-c05c-40c7-831c-ac634ae4b028>
8. UNICEF. Early marriage: Child spouses. *Innocenti Digest* No. 7, March 2001. Florence, Italy: Unicef, Innocenti Research Centre 2001.
9. Mukherjee A, Sekher T. Do Only Girls Suffer? We Too! *Economic & Political Weekly* 2017;52(1):75.
10. UNICEF. Child marriage: Child marriage is a violation of human rights, but is all too common. 2018 Available: <https://data.unicef.org/topic/child-protection/child-marriage/> (Accessed 4 December 2018 )
11. Greene ME, Perlson S, Taylor A, Lauro G. Engaging men and boys to address the practice of child marriage. Washington, DC: Greene Works, 2015.
12. Karim N, Greene M, Picard M. The cultural context of child marriage in Nepal and Bangladesh: Findings from CARE's Tipping Point project community participatory analysis: Research report. Geneva: CARE, 2016.
13. Misunas C, Gastón CM, Cappa C. Child marriage among boys in high-prevalence countries: An analysis of sexual and reproductive health outcomes. *BMC International Health and Human Rights* 2019;19(1):25. Available: <https://bmcinthealthhumrights.biomedcentral.com/track/pdf/10.1186/s12914-019-0212-8>
14. Gastón CM, Misunas C, Cappa C. Child marriage among boys: a global overview of available data. *Vulnerable Children and Youth Studies* 2019:1-10. <https://doi.org/10.1080/17450128.2019.1566584>

15. Verma R, Sinha T, Khanna T. Asia child marriage initiative: Summary of research in Bangladesh, India and Nepal. International Center for Research on Women (ICRW), Plan Asia Regional Office, 2013. Available: <https://www.icrw.org/wp-content/uploads/2016/10/PLAN-ASIA-Child-Marriage-3-Country-Study.pdf>.
16. Malhotra A, Warner A, McGonagle A, Lee-Rife S. Solutions to end child marriage. Washington, DC: International Center for Research on Women, 2011.
17. National Institute of Population Research and Training (NIPORT), ICF International (USA) and Mitra and Associates. Bangladesh Demographic and Health Survey 2011. Dhaka, Bangladesh, and Rockville, Maryland, USA, 2013. Available at <https://dhsprogram.com/pubs/pdf/fr265/fr265.pdf>
18. Khan TZ. Study: 80% slum girls victims of child marriage Dhaka. The Dhaka Tribune [May 22, 2014]. Available: <https://www.dhakatribune.com/uncategorized/2014/05/22/study-80-slum-girls-victims-of-child-marriage> (Accessed 13 March 2019)
19. Stavropoulou M, Marcus R, Rezel E, Gupta-Archer N, Noland C. Adolescent girls' capabilities in Bangladesh: The state of the evidence. London: Gender and Adolescence: Global Evidence (GAGE); 2017. Available from: [https://www.gage.odg.org/sites/default/files/2018-02/Bangladesh%20Capabilities%20Report\\_0.pdf](https://www.gage.odg.org/sites/default/files/2018-02/Bangladesh%20Capabilities%20Report_0.pdf).
20. Rashid SF. Human rights and reproductive health: Political realities and pragmatic choices for married adolescent women living in urban slums, Bangladesh. *BMC international health and human rights* 2011; 11(3):[S3 p.]. Available: <http://www.biomedcentral.com/1472-698X/11/S3/S3>
21. Rashid, S F, Marriage Practices in an Urban Slum: Vulnerability, Challenges to Traditional Arrangements and Resistance by Adolescent Women in Dhaka, Bangladesh. Asia Research Institute Working Paper No. 72; 2006. Available: <http://dx.doi.org/10.2139/ssrn.1317159>
22. UNICEF. Early marriage a harmful traditional practice: A statistical exploration. New York: UNICEF; 2005. Available from: [http://www.unicef.org/publications/files/Early\\_Marriage\\_12.lo.pdf](http://www.unicef.org/publications/files/Early_Marriage_12.lo.pdf)
23. Government of Bangladesh (GoB). Child Marriage Restraint Act, 2017 (Act No. 6 of 2017). 2017.
24. Hossain S. Legal Remedies for Forced Marriage in Bangladesh. In: Hossain S, Welchman L, editors. Remedies for Forced Marriage: A Handbook for Lawyers. INTERIGHTS - The International Centre for the Legal Protection of Human Rights, 2014.
25. Center for Reproductive Rights. Ending Impunity for Child Marriage in Bangladesh: Normative and implementation gaps. Policy brief, 2018. New York.
26. Ferdous D, Saha P, Yeasmin F. Preventing child, early and forced marriage in Bangladesh: understanding socio-economic drivers and legislative gaps: Final report. Oxfam, 2019. Available: <https://oxfamilibrary.openrepository.com/handle/10546/620881>
27. Baden S, Green C, Goetz AM, Guhathakurta M. Background report on gender issues in Bangladesh: University of Sussex: Institute of Development Studies, 1994.
28. Koster W, Miedema E, Hodgkinson K, Pouw N, Meyer P. Her Choice Baseline Study Synthesis Report. Amsterdam: The Amsterdam Institute for Social Science Research, 2017.
29. Rao N. Breadwinners and homemakers: Migration and changing conjugal expectations in rural Bangladesh. *Journal of Development Studies* 2012; 48(1):26-40. Available: <http://dx.doi.org/10.1080/00220388.2011.629648>.
30. Blanchet T. Lost innocence, stolen childhoods. Dhaka: University Press Ltd., 1996.

- 1
- 2
- 3
- 4 31. Karim S. Living sexualities: Non-heterosexual women and sexuality in urban middle class Bangladesh. In: Helie A, Hoodfar H, eds. Policing sexuality and Muslim women's resistance. London: Zed Books, 2012: 269-93.
- 5
- 6
- 7 32. Karim, S. Sexualities: Practices: Bangladesh. In: Joseph S. ed Encyclopedia of women & Islamic cultures. Brill Online Reference Works, 2012. Available: [http://dx.doi.org/10.1163/1872-5309\\_ewic\\_EWICCOM\\_001441](http://dx.doi.org/10.1163/1872-5309_ewic_EWICCOM_001441)
- 8
- 9
- 10
- 11 33. Cairns RB, Leung MC, Buchanan L, Cairns BD. Friendships and social networks in childhood and adolescence: Fluidity, reliability, and interrelations. *Child development* 1995;66(5):1330-45.
- 12
- 13 34. Hasam MA, Mushahid M. Drug addiction in urban life of Bangladesh: A sociological study for exploring the causes. *Asia Pacific Journal of Multidisciplinary Research* 2017; 5(2). Available: [www.apjmr.com/wp-content/uploads/2017/04/APJMR-2017.5.2.01.pdf](http://www.apjmr.com/wp-content/uploads/2017/04/APJMR-2017.5.2.01.pdf).
- 14
- 15
- 16
- 17 35. Bangladesh Bureau of Statistics (BBS). Child Labor Survey 2013. Dhaka: Bangladesh Bureau of Statistics, Ministry of planning, 2015.
- 18
- 19
- 20 36. Asekun-Olarinmoye OS, Asekun-Olarinmoye EO, Adebimpe WO, Omisore AG. Effect of mass media and internet on sexual behavior of undergraduates in Osogbo metropolis, southwestern Nigeria. *Adolescent health, medicine and therapeutics* 2014; 5:15. doi: [10.2147/AHMT.S54339](https://doi.org/10.2147/AHMT.S54339)
- 21
- 22
- 23 37. Owens EW, Behun RJ, Manning JC, Reid RC. The impact of Internet pornography on adolescents: A review of the research. *Sexual Addiction & Compulsivity* 2012;19(1-2):99-122. <https://doi.org/10.1080/10720162.2012.660431>
- 24
- 25
- 26
- 27 38. Dickson-Gomez J, Quinn K, Broaddus M, Pacella M. Gang masculinity and high-risk sexual behaviours. *Culture, health & sexuality* 2017; 19(2):165-78. doi: [10.1080/13691058.2016.1213422](https://doi.org/10.1080/13691058.2016.1213422)
- 28
- 29
- 30 39. Unicef. The State of the World's Children-Special Edition: Celebrating 20 Years on the Convention on the Rights of the Child: Executive Summary. Unicef, 2009.
- 31
- 32
- 33 40. Islam A. Crime and Delinquency among Slum Children of Dhaka City: A Sociological Study. Lambert Academic Publishing, 2015.
- 34
- 35
- 36 41. Lancet T. Adolescent health: Boys matter too. *The Lancet* 2015;386(10010):2227. doi:[https://doi.org/10.1016/S0140-6736\(15\)01160-5](https://doi.org/10.1016/S0140-6736(15)01160-5)
- 37
- 38
- 39 42. Peate I. Male adolescent health and wellbeing matters too. *British Journal of School Nursing* 2016; 11(1):33-5. Available: <https://doi.org/10.12968/bjsn.2016.11.1.33>
- 40
- 41
- 42
- 43
- 44
- 45
- 46
- 47
- 48
- 49
- 50
- 51
- 52
- 53
- 54
- 55
- 56
- 57
- 58
- 59
- 60

This consolidated criteria for reporting qualitative studies (COREQ) checklist for this article are described as follows-

| No Item                                        | Description                                                                                                                                                                                                                                                                                                                                                                                         |
|------------------------------------------------|-----------------------------------------------------------------------------------------------------------------------------------------------------------------------------------------------------------------------------------------------------------------------------------------------------------------------------------------------------------------------------------------------------|
| <b>Domain 1: Research team and reflexivity</b> |                                                                                                                                                                                                                                                                                                                                                                                                     |
| <b>Personal Characteristics</b>                |                                                                                                                                                                                                                                                                                                                                                                                                     |
| 1. Interviewer/facilitator                     | SubasBiswas with other researchers conducted the interviews and focus group discussion sessions. Sabina F Rashid trained researchers how to conduct interviews and focus group                                                                                                                                                                                                                      |
| 2. Credentials                                 | All of the researchers had minimum Master's degree in Anthropology, Public Health or Social Science Whereas Sabina F Rasid and ShuchKarim have PhD degree.                                                                                                                                                                                                                                          |
| 3. Occupation                                  | All of the researchers were full time engaged in this research; however, Sabina F Rashid and ShuchiKarim were also involved in teaching in universities.                                                                                                                                                                                                                                            |
| 4. Gender                                      | There were a group of researchers and both male and females researchers were in this group                                                                                                                                                                                                                                                                                                          |
| 5. Experience and training                     | All of the researchers had prior experience in conducting research. Moreover, all of the researchers were gone through several training and workshop sessions for present study                                                                                                                                                                                                                     |
| <b>Relationship with participants</b>          |                                                                                                                                                                                                                                                                                                                                                                                                     |
| 6. Relationship established                    | Prior to data collection a good rapport was established with each respondents and also community people. The researchers spent several weeks in the field and collected data.                                                                                                                                                                                                                       |
| 7. Participant knowledge of the interviewer    | Participants were informed about the researcher's identity, objectives and involvement in this study.                                                                                                                                                                                                                                                                                               |
| 8. Interviewer characteristics                 | Researcher informed participants about their designation, affiliation of the organization, aims and objectives of the study and what the involvements of the researchers in this study were. Participants were also informed how researchers would use this data and what would be the role of the researchers in presenting information to other audiences.                                        |
| <b>Domain 2: study design</b>                  |                                                                                                                                                                                                                                                                                                                                                                                                     |
| <b>Theoretical framework</b>                   |                                                                                                                                                                                                                                                                                                                                                                                                     |
| 9. Methodological orientation and Theory       | Content and thematic analysis were done to underpin the study                                                                                                                                                                                                                                                                                                                                       |
| <b>Participant selection</b>                   |                                                                                                                                                                                                                                                                                                                                                                                                     |
| 10. Sampling                                   | Purposive and snowballing methods were used to select participants                                                                                                                                                                                                                                                                                                                                  |
| 11. Method of approach                         | Participants were approached face-to-face                                                                                                                                                                                                                                                                                                                                                           |
| 12. Sample size                                | The broader research project collected both quantitative and qualitative data using questionnaire survey with 2136 adolescent girls and young women aged 13-24 years and 96 In-depth interview (IDI), and 12 focus group discussion (FGD) were conducted with married and unmarried adolescents and young girls and boys aged 15-24 years, their parents and 33 key-informant interviews (KII) with |

|                                        |                                                                                                                                                                                                                                                                                                                                                                                                                                                                                                                                                                        |
|----------------------------------------|------------------------------------------------------------------------------------------------------------------------------------------------------------------------------------------------------------------------------------------------------------------------------------------------------------------------------------------------------------------------------------------------------------------------------------------------------------------------------------------------------------------------------------------------------------------------|
|                                        | <p>community leaders, teachers, marriage registrars and program people.</p> <p>However, this present article used 22 In-depth interviews (IDIs) and 3 focus group discussions (FGD) with married and unmarried adolescent and young males aged 15-24 years; 13 IDIs and 4 FGDs with parents and 11 key-informant interviews (KIIs) with community leaders.</p>                                                                                                                                                                                                         |
| 13. Non-participation                  | About 10-12 young male respondents refused to participate in this study as they were not interested or they had no time enough to spend time as most of the interviews were conducted at the day tome and these potential participants were engaged in work during day time.                                                                                                                                                                                                                                                                                           |
| <b>Setting</b>                         |                                                                                                                                                                                                                                                                                                                                                                                                                                                                                                                                                                        |
| 14. Setting of data collection         | All of the interviews were conducted at participants own setting, whether it was in their home or near to their home where they felt comfort to talk.                                                                                                                                                                                                                                                                                                                                                                                                                  |
| 15. Presence of non-participants       | <p>When interviews were conducted in participant's own home, there were family members near to the interview sessions in some cases. But they were not present full time of the interview sessions.</p> <p>One researcher conduct one interview and audio recorder was used to record all of the conversations with the informed consent of the participants.</p> <p>Two researchers were involved to conduct focus group discussions session. Here researchers also used audio recorder to record all of the conversations with informed consent of participants.</p> |
| 16. Description of sample              | The sample characteristics include age, marital status, age at marriage, income and job status                                                                                                                                                                                                                                                                                                                                                                                                                                                                         |
| <b>Data collection</b>                 |                                                                                                                                                                                                                                                                                                                                                                                                                                                                                                                                                                        |
| 17. Interview guide                    | Data were collected using pretested guidelines phase by phase in two study sites                                                                                                                                                                                                                                                                                                                                                                                                                                                                                       |
| 18. Repeat interviews                  | No repeat interviews were conducted                                                                                                                                                                                                                                                                                                                                                                                                                                                                                                                                    |
| 19. Audio/visual recording             | The research use audio recording with informed consent of the participants to collect the data                                                                                                                                                                                                                                                                                                                                                                                                                                                                         |
| 20. Field notes                        | Field note were taken during and after the In-depth Interview (IDI) and Focus Group discussion (FGD) and also key-Informant Interviews(KII)                                                                                                                                                                                                                                                                                                                                                                                                                            |
| 21. Duration                           | For IDIs, the duration was about 90-100 minutes,<br>For FGDs, the duration was about 120-150 minutes<br>For KIIs, the duration was about 60-80 minutes                                                                                                                                                                                                                                                                                                                                                                                                                 |
| 22. Data saturation                    | Data saturation was not discussed                                                                                                                                                                                                                                                                                                                                                                                                                                                                                                                                      |
| 23. Transcripts returned               | Transcripts were not returned to participants for comment or correction                                                                                                                                                                                                                                                                                                                                                                                                                                                                                                |
| <b>Domain 3: analysis and findings</b> |                                                                                                                                                                                                                                                                                                                                                                                                                                                                                                                                                                        |
| <b>Data analysis</b>                   |                                                                                                                                                                                                                                                                                                                                                                                                                                                                                                                                                                        |
| 24. Number of data coders              | Eight data coders coded the data                                                                                                                                                                                                                                                                                                                                                                                                                                                                                                                                       |

|                                    |                                                                                                                                                         |
|------------------------------------|---------------------------------------------------------------------------------------------------------------------------------------------------------|
| 25. Description of the coding tree | The authors did not provide a description of the coding tree                                                                                            |
| 26. Derivation of themes           | Themes were derived from the data                                                                                                                       |
| 27. Software                       | Atlasti (version 8) software was used to manage the data                                                                                                |
| 28. Participant checking           | Participants did not check the findings                                                                                                                 |
| <b>Reporting</b>                   |                                                                                                                                                         |
| 29. Quotations presented           | Participant quotations are presented to illustrate the findings. Basic characteristics of these participants were also presented with these quotations. |
| 30. Data and findings consistent   | Consistency between the data and findings are discussed                                                                                                 |
| 31. Clarity of the major themes    | Major themes are clearly presented in the findings                                                                                                      |
| 32. Clarity of minor themes        | A description of diverse cases and discussion of minor themes are also presented                                                                        |
